# Supplementary material for: Loss of MIG-6 results in endometrial progesterone resistance via ERBB2
Source: Research Square preprint supplement (doi:10.21203/rs.3.rs-95903/v1), 2020-11-10
Supplement: Supplementary file 2 [file d3bf9d27e4839f7c9c2f2474.docx]

**
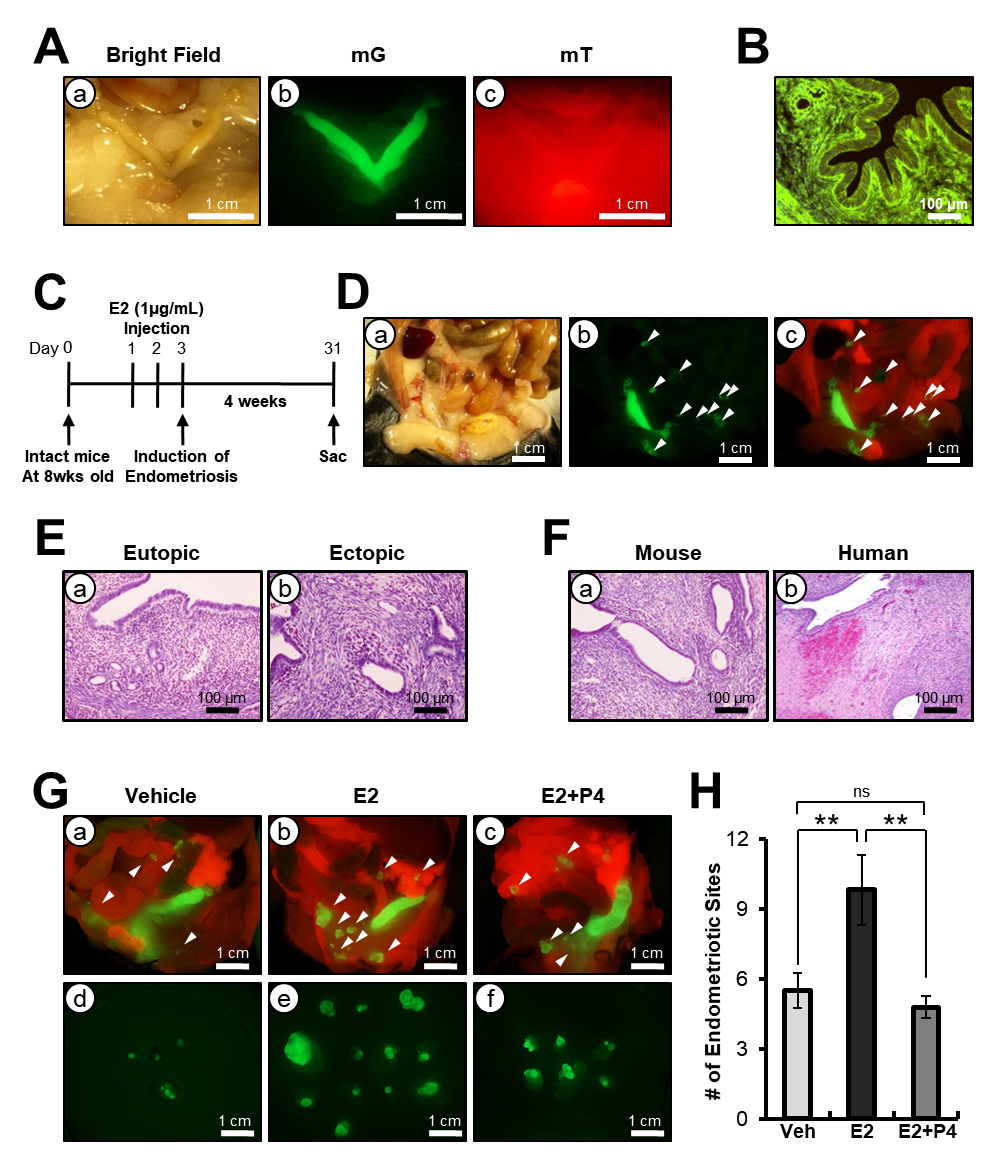
**

**Fig. S1. Development a mouse model of endometriosis in *Pgrcre/+Rosa26mT/mG* mice with a double-fluorescent Cre reporter. A,** Double-fluorescence based on Cre-recombinase activity in *Pgrcre/+Rosa26mT/mG* mice. **B,** Green fluorescence photomicrographs in uterus of *Pgrcre/+Rosa26mT/mG* mice. **C,** Process schematic diagram of the mouse model of endometriosis based on *mT/mG* mice. **D,** Fluorescence photomicrographs of endometriotic sites in *Pgrcre/+Rosa26mT/mG* mice. **E,** Hematoxylin and eosin (H&E) staining of eutopic endometrium and ectopic lesion in mouse model of endometriosis. **F,** H&E staining of ectopic lesions of mouse model of endometriosis and women with endometriosis. **G, H,** Fluorescence photomicrographs (G) and average total number (H) of endometriosis lesions in *Pgrcre/+mT/mG* mice treated with vehicle, E2, and E2+P4 for 1 month (n=6 or more per treatment). Arrowheads indicate lesions attached to the outside of uterus. Mean ± SEM, ** p<0.01, ANOVA followed by Tukey test.


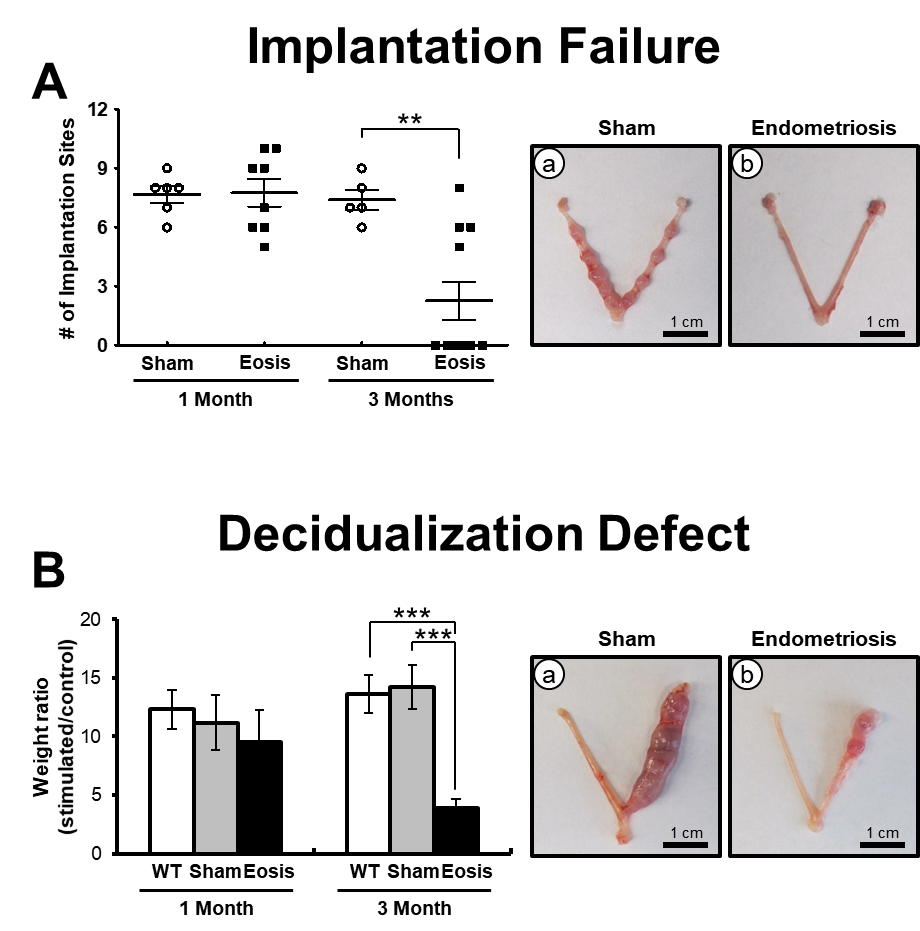


**Fig. S2.** **Defects of implantation and decidualization in the mouse with endometriosis. A,** Average number and uterine images of implantation sites at GD 7.5 in mice with endometriosis on 1 and 3 months after endometriosis induction (n=5 or more per period). **B,** Average ratio of stimulated uterine weight to control weight and uterine images of mice with endometriosis after artificially induced decidualization (n=5 or more per period). Mean ± SEM, ** p<0.01 and *** p<0.001, ANOVA followed by Tukey test.

**
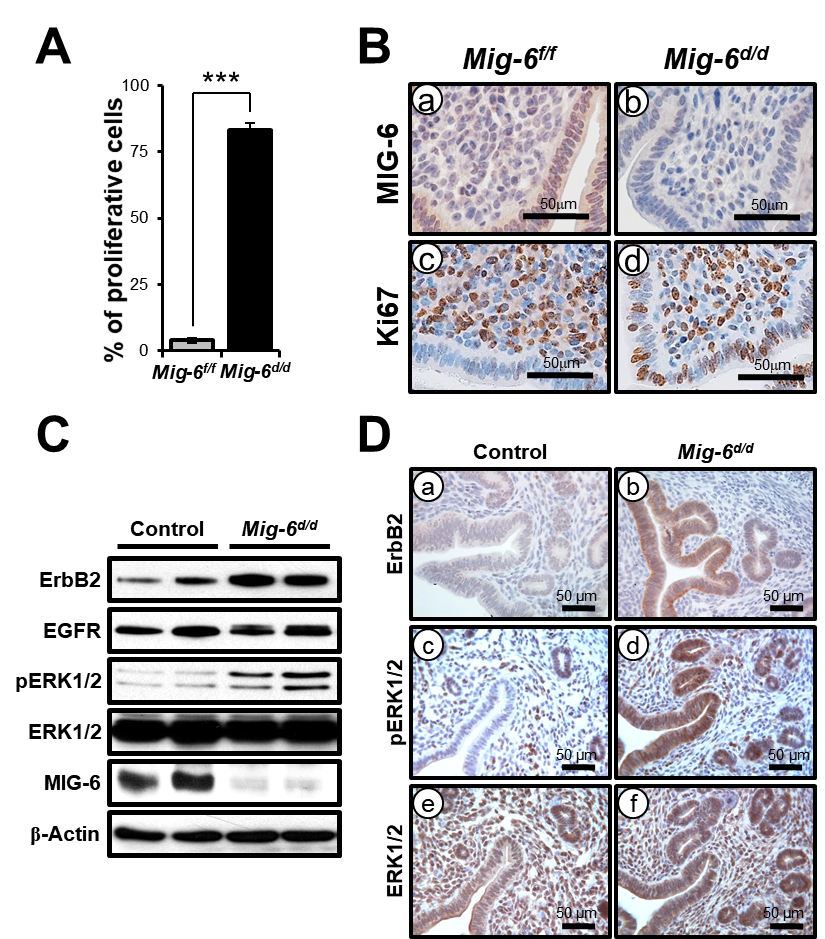
**

**Fig. S3. Aberrant activation of epithelial proliferation through ErbB2-ERK signaling by *Mig-6* loss. A, B,** The percentage (A) and representative photomicrograph of immunohistochemistry analysis (B) of Ki67 expressing as a proliferation marker in the endometrial epithelium of control and *Mig-6d/d* mice at GD 3.5 (n=5 per genotype). Mean ± SEM, *** p<0.001, Student’s t test. **C,** Western blot analysis of ErbB2, EGFR, pERK1/2, total ERK1/2, and MIG-6 in the uterus of control and *Mig-6d/d* mice at GD 3.5. β-actin was used as sample-loading control. **D,** Immunohistochemistry analysis of ErbB2, pERK1/2, total ERK1/2 in the uterus of control and *Mig-6d/d* mice at GD 3.5.

**
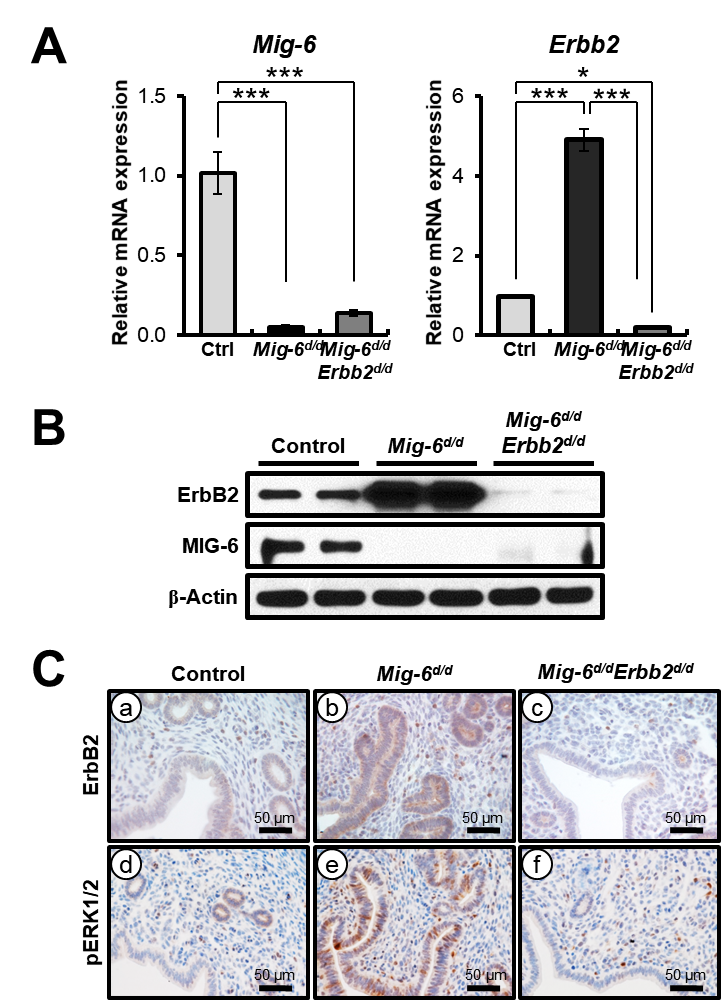
**

**Fig. S4. Generation of *Mig-6d/dErbb2d/d* mice. A,** RT-qPCR analysis of *Mig-6* and *Erbb2* gene expression in the uterus of control, *Mig-6d/d*, and *Mig-6d/dErbb2d/d* mice (n = 6 per genotype). Mean ± SEM, * p<0.05 and *** p<0.001, ANOVA followed by Tukey test. **B, C,** Western blot analysis of ErbB2 and MIG-6 proteins (B) and immunohistochemistry analysis of ErbB2 and pERK1/2 (C) in the uterus of control, *Mig-6d/d*, and *Mig-6d/dErbb2d/d* mice. β-actin was used as sample-loading control.

**
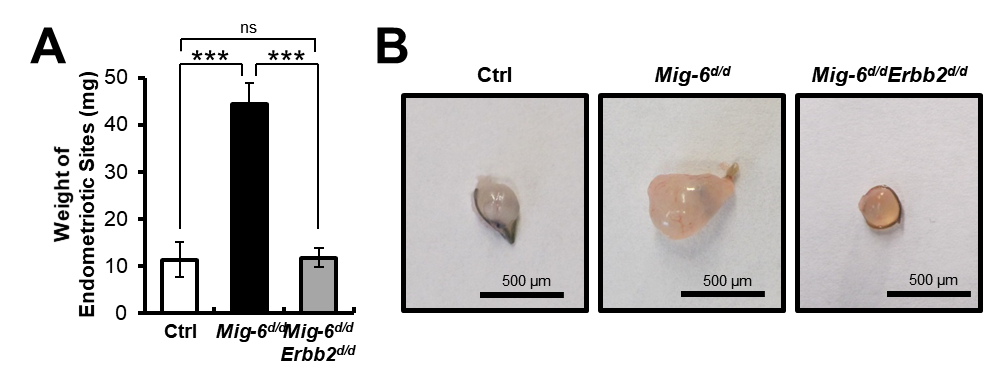
**

**Fig. S5. Effect of ErbB2 loss on endometriotic lesion development. A,** Quantitative weights of uteri in control, *Mig-6d/d*, and *Mig-6d/dErbb2d/d* mice (n=4 or more per genotype). Mean ± SEM, *** p<0.001, ANOVA followed by Tukey test. **B,** endometriotic lesions of control, *Mig-6d/d*, and *Mig-6d/dErbb2d/d* mice.

**
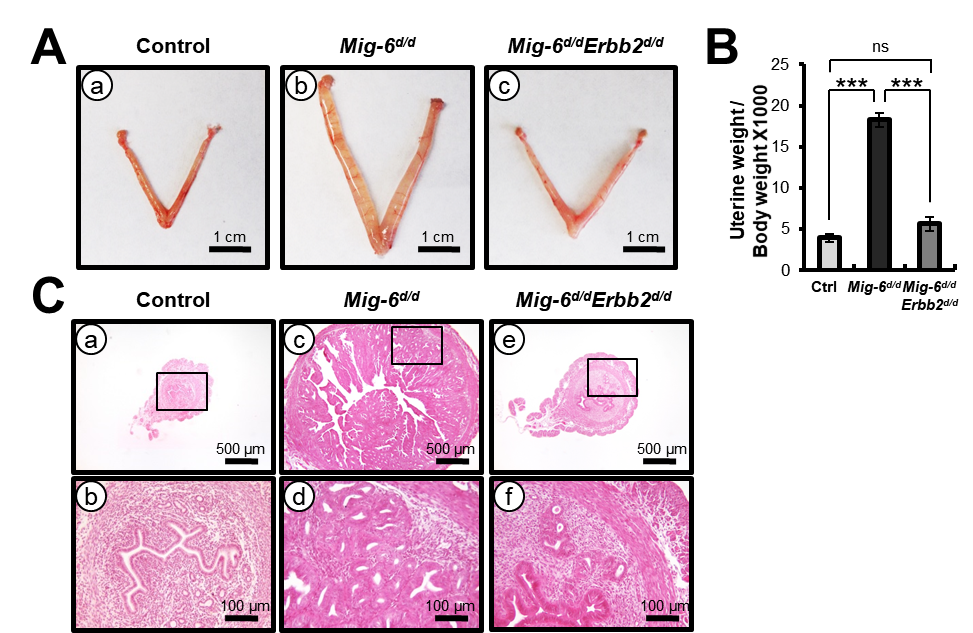
**

**Fig. S6.** **Reversal of endometrial hyperplasia in *Mig-6d/d* miceby *Erbb2* double ablation. A,** Uterine images of 5-month-old control, *Mig-6d/d*, and *Mig-6d/dErbb2d/d* mice. **B,** Quantitative weights of uteri in control, *Mig-6d/d*, and *Mig-6d/dErbb2d/d* mice (n=4 or more per genotype). Mean ± SEM, *** p<0.001, ANOVA followed by Tukey test. C**,** H&E staining in paired endometrium of 5-month-old control, *Mig-6d/d*, and *Mig-6d/dErbb2d/d* mice.

**Table S1.** The rescue of the infertility by *Mig-6* ablation in the *Mig-6*/*Erbb2* double ablation mice observed in a 6-month fertility trial.

| Genotype | Number of Litters | Number of Pups | Average Pups/Litter | Average Number of Litters/mouse |
| --- | --- | --- | --- | --- |
| Control | 27 | 196 | 7.29 ± 0.29 | 5.40 ± 0.40 |
| *Mig-6d/dErbb2d/d* | 24 | 156 | 6.40 ± 0.49 | 4.80 ± 0.49 |

| **Table S2**. List of genes regulated by *Mig-6* ablation | | | | |
| --- | --- | --- | --- | --- |
| **Probe Set ID** | **Accession_ID** | **Gene** | **Description** | **Fold** |
| 1419549_at | NM_007482 | Arg1 | arginase, liver | 35.89 |
| 1419167_at | NM_009475 | Prap1 | proline-rich acidic protein 1 | 35.02 |
| 1449133_at | NM_009264 | Sprr1a | small proline-rich protein 1A | 28.42 |
| 1455996_x_at | NM_009475 | Prap1 | proline-rich acidic protein 1 | 27.33 |
| 1419230_at | NM_010661 | Krt12 | keratin 12 | 24.89 |
| 1449254_at | NM_009263 | Spp1 | secreted phosphoprotein 1 | 24.62 |
| 1450618_a_at | NM_001164787 | Sprr2a1 /// Sprr2a2 | small proline-rich protein 2A1 /// small proline-rich protein 2A2 | 22.72 |
| 1416306_at | NM_017474 | Clca3 | chloride channel calcium activated 3 | 22.57 |
| 1438555_x_at | NM_080457 | Muc4 | mucin 4 | 20.00 |
| 1439016_x_at | NM_001164787 | Sprr2a1 /// Sprr2a2 /// Sprr2a3 | small proline-rich protein 2A1 /// small proline-rich protein 2A2 /// small proline-rich protein 2A3 | 19.55 |
| 1419231_s_at | NM_010661 | Krt12 | keratin 12 | 17.86 |
| 1418649_at | NM_028133 | Egln3 | EGL nine homolog 3 (C. elegans) | 15.92 |
| 1427747_a_at | NM_008491 | Lcn2 | lipocalin 2 | 15.37 |
| 1429950_at | NM_152823 | Unc5cl | unc-5 homolog C (C. elegans)-like | 14.39 |
| 1450009_at | NM_008522 | Ltf | lactotransferrin | 12.42 |
| 1455531_at | NM_001114662 | Mfsd4 | major facilitator superfamily domain containing 4 | 10.88 |
| 1436021_at | NM_001114662 | Mfsd4 | major facilitator superfamily domain containing 4 | 10.79 |
| 1434449_at | NM_009700 | Aqp4 | aquaporin 4 | 10.17 |
| 1452614_at | NM_001142959 | Bcl2l15 | BCLl2-like 15 | 9.11 |
| 1448566_at | NM_016917 | Slc40a1 | solute carrier family 40 (iron-regulated transporter), member 1 | 9.00 |
| 1419615_at | NM_022413 | Trpv6 | transient receptor potential cation channel, subfamily V, member 6 | 8.54 |
| 1450194_a_at | NM_010848 | Myb | myeloblastosis oncogene | 8.29 |
| 1418405_at | NM_019447 | Hgfac | hepatocyte growth factor activator | 8.28 |
| 1421317_x_at | NM_010848 | Myb | myeloblastosis oncogene | 8.07 |
| 1420352_at | NM_133731 | Prss22 | protease, serine, 22 | 7.91 |
| 1418509_at | NM_007621 | Cbr2 | carbonyl reductase 2 | 7.64 |
| 1420378_at | NM_009160 | Sftpd | surfactant associated protein D | 7.42 |
| 1422734_a_at | NM_010848 | Myb | myeloblastosis oncogene | 7.28 |
| 1452716_at | NM_027464 | 5730469M10Rik | RIKEN cDNA 5730469M10 gene | 7.19 |
| 1425233_at | NM_144544 | 2210407C18Rik | RIKEN cDNA 2210407C18 gene | 7.11 |
| 1423323_at | NM_020047 | Tacstd2 | tumor-associated calcium signal transducer 2 | 7.04 |
| 1417957_a_at | NM_133681 | Tspan1 | tetraspanin 1 | 6.87 |
| 1422760_at | NM_011061 | Padi4 | peptidyl arginine deiminase, type IV | 6.62 |
| 1453352_at | NM_176999 | Atp10b | ATPase, class V, type 10B | 6.56 |
| 1423804_a_at | NM_145360 | Idi1 | isopentenyl-diphosphate delta isomerase | 6.46 |
| 1436237_at | NM_001033149 | Ttc9 | tetratricopeptide repeat domain 9 | 6.45 |
| 1423952_a_at | NM_033073 | Krt7 | keratin 7 | 6.43 |
| 1417314_at | NM_001142706 | C2 /// Cfb | complement component 2 (within H-2S) /// complement factor B | 6.28 |
| 1417895_a_at | NM_025452 | Tmem54 | transmembrane protein 54 | 6.20 |
| 1427711_a_at | NM_001039185 | Ceacam1 | carcinoembryonic antigen-related cell adhesion molecule 1 | 6.17 |
| 1425382_a_at | NM_009700 | Aqp4 | aquaporin 4 | 6.08 |
| 1451461_a_at | NM_009657 | Aldoc | aldolase C, fructose-bisphosphate | 5.98 |
| 1435693_at | NM_145532 | Mall | mal, T-cell differentiation protein-like | 5.97 |
| 1419323_at | NM_011059 | Padi1 | peptidyl arginine deiminase, type I | 5.93 |
| 1424600_at | NM_001161621 | Abp1 | amiloride binding protein 1 (amine oxidase, copper-containing) | 5.86 |
| 1449833_at | NM_011472 | Sprr2f | small proline-rich protein 2F | 5.86 |
| 1416271_at | NM_022032 | Perp | PERP, TP53 apoptosis effector | 5.79 |
| 1417588_at | NM_015736 | Galnt3 | UDP-N-acetyl-alpha-D-galactosamine:polypeptide N-acetylgalactosaminyltransferase 3 | 5.74 |
| 1447774_x_at | NM_027464 | 5730469M10Rik | RIKEN cDNA 5730469M10 gene | 5.73 |
| 1452532_x_at | NM_001039185 | Ceacam1 | carcinoembryonic antigen-related cell adhesion molecule 1 | 5.65 |
| 1425675_s_at | NM_001039185 | Ceacam1 | carcinoembryonic antigen-related cell adhesion molecule 1 | 5.57 |
| 1424966_at | NM_001168256 | Tmem40 | transmembrane protein 40 | 5.51 |
| 1449199_at | NM_013605 | Muc1 | mucin 1, transmembrane | 5.51 |
| 1425065_at | NM_145227 | Oas2 | 2'-5' oligoadenylate synthetase 2 | 5.51 |
| 1425538_x_at | NM_001039185 | Ceacam1 | carcinoembryonic antigen-related cell adhesion molecule 1 | 5.51 |
| 1427042_at | NM_178920 | Mal2 | mal, T-cell differentiation protein 2 | 5.49 |
| 1451786_at | NM_001145874 | Muc20 | mucin 20 | 5.47 |
| 1422123_s_at | NM_001039185 | Ceacam1 /// Ceacam2 | carcinoembryonic antigen-related cell adhesion molecule 1 /// carcinoembryonic antigen-related cell adhesion molecule 2 | 5.47 |
| 1429520_a_at | NM_025408 | Acer3 | alkaline ceramidase 3 | 5.46 |
| 1423078_a_at | NM_025436 | Sc4mol | sterol-C4-methyl oxidase-like | 5.45 |
| 1438306_at | NM_027934 | Rnf180 | ring finger protein 180 | 5.35 |
| 1419571_at | NM_022317 | Slc28a3 | solute carrier family 28 (sodium-coupled nucleoside transporter), member 3 | 5.33 |
| 1435308_at | NM_010243 | Fut9 | fucosyltransferase 9 | 5.28 |
| 1427630_x_at | NM_001039185 | Ceacam1 | carcinoembryonic antigen-related cell adhesion molecule 1 | 5.26 |
| 1426872_at | NM_001122603 | Fcgbp | Fc fragment of IgG binding protein | 5.25 |
| 1450646_at | NM_020010 | Cyp51 | cytochrome P450, family 51 | 5.22 |
| 1418449_at | NM_133664 | Lad1 | ladinin | 5.21 |
| 1460682_s_at | NM_001039185 | Ceacam1 /// Ceacam2 | carcinoembryonic antigen-related cell adhesion molecule 1 /// carcinoembryonic antigen-related cell adhesion molecule 2 | 5.21 |
| 1438799_at | NR_015388 | Dlx6os1 | Dlx6 opposite strand transcript 1 | 5.16 |
| 1438512_at | NM_001193274 | BC048679 | cDNA sequence BC048679 | 5.11 |
| 1443933_at | NM_001082976 | Tc2n | tandem C2 domains, nuclear | 5.08 |
| 1450494_x_at | NM_001039185 | Ceacam1 | carcinoembryonic antigen-related cell adhesion molecule 1 | 5.06 |
| 1438160_x_at | NM_148933 | Slco4a1 | solute carrier organic anion transporter family, member 4a1 | 5.06 |
| 1416596_at | NM_023557 | Slc44a4 | solute carrier family 44, member 4 | 5.06 |
| 1448752_at | NM_009801 | Car2 | carbonic anhydrase 2 | 5.04 |
| 1417061_at | NM_016917 | Slc40a1 | solute carrier family 40 (iron-regulated transporter), member 1 | 5.04 |
| 1437760_at | NM_172693 | Galnt12 | UDP-N-acetyl-alpha-D-galactosamine:polypeptide N-acetylgalactosaminyltransferase 12 | 5.02 |
| 1417958_at | NM_133681 | Tspan1 | tetraspanin 1 | 4.99 |
| 1457409_at | NM_010243 | Fut9 | fucosyltransferase 9 | 4.87 |
| 1452087_at | NM_029495 | Epsti1 | epithelial stromal interaction 1 (breast) | 4.84 |
| 1432418_a_at | NM_009897 | Ckmt1 | creatine kinase, mitochondrial 1, ubiquitous | 4.74 |
| 1425298_a_at | NM_008670 | Naip1 | NLR family, apoptosis inhibitory protein 1 | 4.70 |
| 1447227_at | AI504711 | --- |  | 4.64 |
| 1426302_at | NM_145403 | Tmprss4 | transmembrane protease, serine 4 | 4.60 |
| 1451527_at | NM_029620 | Pcolce2 | procollagen C-endopeptidase enhancer 2 | 4.53 |
| 1451532_s_at | NM_027399 | Steap1 | six transmembrane epithelial antigen of the prostate 1 | 4.51 |
| 1442819_at | NM_183163 | Rhbdl2 | rhomboid, veinlet-like 2 (Drosophila) | 4.50 |
| 1451122_at | NM_145360 | Idi1 | isopentenyl-diphosphate delta isomerase | 4.45 |
| 1451191_at | NM_007759 | Crabp2 | cellular retinoic acid binding protein II | 4.45 |
| 1451895_a_at | NM_053272 | Dhcr24 | 24-dehydrocholesterol reductase | 4.45 |
| 1448393_at | NM_001193619 | Cldn7 | claudin 7 | 4.40 |
| 1416916_at | NM_001163131 | Elf3 | E74-like factor 3 | 4.39 |
| 1431805_a_at | NM_027897 | Rhpn2 | rhophilin, Rho GTPase binding protein 2 | 4.38 |
| 1455186_a_at | NM_029821 | 1190003J15Rik | RIKEN cDNA 1190003J15 gene | 4.37 |
| 1422533_at | NM_020010 | Cyp51 | cytochrome P450, family 51 | 4.35 |
| 1452326_at | NM_026922 | Atp2c2 | ATPase, Ca++ transporting, type 2C, member 2 | 4.34 |
| 1423418_at | NM_134469 | Fdps | farnesyl diphosphate synthetase | 4.31 |
| 1452661_at | NM_011638 | Tfrc | transferrin receptor | 4.28 |
| 1451610_at | NM_153576 | Cxcl17 | chemokine (C-X-C motif) ligand 17 | 4.27 |
| 1448734_at | NM_001042611 | Cp | ceruloplasmin | 4.27 |
| 1460681_at | NM_001039185 | Ceacam1 | carcinoembryonic antigen-related cell adhesion molecule 1 | 4.17 |
| 1444524_at | NR_028589 | Gm14005 | predicted gene 14005 | 4.16 |
| 1454169_a_at | NM_029495 | Epsti1 | epithelial stromal interaction 1 (breast) | 4.15 |
| 1443163_at | NM_001039676 | Slc39a2 | solute carrier family 39 (zinc transporter), member 2 | 4.13 |
| 1441917_s_at | NM_001168256 | Tmem40 | transmembrane protein 40 | 4.09 |
| 1431786_s_at | NM_029821 | 1190003J15Rik | RIKEN cDNA 1190003J15 gene | 4.08 |
| 1416673_at | NM_019517 | Bace2 | beta-site APP-cleaving enzyme 2 | 4.07 |
| 1428719_at | XM_913918 | 2010309G21Rik /// Igl-C2 | RIKEN cDNA 2010309G21 gene /// immunoglobulin lambda chain, constant region 2 | 4.07 |
| 1451457_at | NM_172769 | Sc5d | sterol-C5-desaturase (fungal ERG3, delta-5-desaturase) homolog (S. cerevisae) | 4.06 |
| 1435945_a_at | NM_001163510 | Kcnn4 | potassium intermediate/small conductance calcium-activated channel, subfamily N, member 4 | 4.05 |
| 1423954_at | NM_009778 | C3 | complement component 3 | 3.99 |
| 1453282_at | NM_001025192 | Cxadr | coxsackie virus and adenovirus receptor | 3.95 |
| 1451860_a_at | NM_009099 | Trim30a | tripartite motif-containing 30A | 3.95 |
| 1434628_a_at | NM_027897 | Rhpn2 | rhophilin, Rho GTPase binding protein 2 | 3.94 |
| 1452703_at | NM_001171000 | Ahcyl2 | S-adenosylhomocysteine hydrolase-like 2 | 3.92 |
| 1424938_at | NM_027399 | Steap1 | six transmembrane epithelial antigen of the prostate 1 | 3.90 |
| 1417089_a_at | NM_009897 | Ckmt1 | creatine kinase, mitochondrial 1, ubiquitous | 3.88 |
| 1420017_at | NM_001168679 | Tspan8 | tetraspanin 8 | 3.88 |
| 1439045_x_at | NM_001082976 | Tc2n | tandem C2 domains, nuclear | 3.81 |
| 1452354_at | NM_001144992 | 2810459M11Rik | RIKEN cDNA 2810459M11 gene | 3.80 |
| 1452861_at | NM_028096 | 2010300C02Rik | RIKEN cDNA 2010300C02 gene | 3.79 |
| 1426300_at | NM_009655 | Alcam | activated leukocyte cell adhesion molecule | 3.78 |
| 1436590_at | NM_177741 | Ppp1r3b | protein phosphatase 1, regulatory (inhibitor) subunit 3B | 3.78 |
| 1423271_at | NM_008125 | Gjb2 | gap junction protein, beta 2 | 3.76 |
| 1417155_at | NM_008709 | Mycn | v-myc myelocytomatosis viral related oncogene, neuroblastoma derived (avian) | 3.74 |
| 1418129_at | NM_053272 | Dhcr24 | 24-dehydrocholesterol reductase | 3.73 |
| 1424140_at | NM_178389 | Gale | galactose-4-epimerase, UDP | 3.72 |
| 1433579_at | NM_178715 | Tmem30b | transmembrane protein 30B | 3.70 |
| 1418025_at | NM_011498 | Bhlhe40 | basic helix-loop-helix family, member e40 | 3.69 |
| 1417884_at | NM_001029842 | Slc16a6 | solute carrier family 16 (monocarboxylic acid transporters), member 6 | 3.67 |
| 1417495_x_at | NM_001042611 | Cp | ceruloplasmin | 3.62 |
| 1418252_at | NM_008812 | Padi2 | peptidyl arginine deiminase, type II | 3.59 |
| 1437467_at | NM_009655 | Alcam | activated leukocyte cell adhesion molecule | 3.56 |
| 1455577_at | NM_020279 | Ccl28 | chemokine (C-C motif) ligand 28 | 3.54 |
| 1455618_x_at | NM_146173 | Tspan33 | tetraspanin 33 | 3.53 |
| 1417373_a_at | NM_009447 | Tuba4a | tubulin, alpha 4A | 3.52 |
| 1431076_at | NM_013458 | Add2 | adducin 2 (beta) | 3.52 |
| 1418734_at | NM_010392 | H2-Q2 | histocompatibility 2, Q region locus 2 | 3.52 |
| 1421525_a_at | NM_010870 | Naip5 | NLR family, apoptosis inhibitory protein 5 | 3.48 |
| 1416034_at | NM_009846 | Cd24a | CD24a antigen | 3.47 |
| 1417214_at | NM_001082553 | Rab27b | RAB27b, member RAS oncogene family | 3.46 |
| 1450218_at | NM_020279 | Ccl28 | chemokine (C-C motif) ligand 28 | 3.45 |
| 1429239_a_at | NM_133774 | Stard4 | StAR-related lipid transfer (START) domain containing 4 | 3.43 |
| 1417019_a_at | NM_001025779 | Cdc6 | cell division cycle 6 homolog (S. cerevisiae) | 3.41 |
| 1426911_at | NM_013505 | Dsc2 | desmocollin 2 | 3.38 |
| 1417156_at | NM_008471 | Krt19 | keratin 19 | 3.35 |
| 1418076_at | NM_011176 | St14 | suppression of tumorigenicity 14 (colon carcinoma) | 3.34 |
| 1438021_at | NM_001127382 | Rbm47 | RNA binding motif protein 47 | 3.33 |
| 1428720_s_at | XM_913918 | 2010309G21Rik /// Igl-C2 /// Igl-C3 | RIKEN cDNA 2010309G21 gene /// immunoglobulin lambda chain, constant region 2 /// immunoglobulin lambda chain, constant region 3 | 3.33 |
| 1416200_at | NM_001164724 | Il33 | interleukin 33 | 3.31 |
| 1453509_at | NM_026671 | Lypd2 | Ly6/Plaur domain containing 2 | 3.29 |
| 1431609_a_at | NM_001102404 | Acp5 | acid phosphatase 5, tartrate resistant | 3.29 |
| 1435452_at | NM_175507 | Tmem20 | transmembrane protein 20 | 3.28 |
| 1417896_at | NM_013769 | Tjp3 | tight junction protein 3 | 3.26 |
| 1418203_at | NM_021451 | Pmaip1 | phorbol-12-myristate-13-acetate-induced protein 1 | 3.26 |
| 1438435_at | NM_025408 | Acer3 | alkaline ceramidase 3 | 3.25 |
| 1424305_at | NM_152839 | Igj | immunoglobulin joining chain | 3.23 |
| 1439528_at | NM_001081664 | 4833423E24Rik | RIKEN cDNA 4833423E24 gene | 3.23 |
| 1430307_a_at | NM_008615 | Me1 | malic enzyme 1, NADP(+)-dependent, cytosolic | 3.22 |
| 1438408_at | NM_175270 | Ankrd56 | ankyrin repeat domain 56 | 3.20 |
| 1424404_at | NM_029554 | 0610040J01Rik | RIKEN cDNA 0610040J01 gene | 3.20 |
| 1421653_a_at | NM_134051 | Igh-2 /// Igh-VJ558 /// LOC544903 | immunoglobulin heavy chain 2 (serum IgA) /// immunoglobulin heavy chain (J558 family) /// similar to immunoglobulin mu-chain | 3.19 |
| 1437846_x_at | NM_019517 | Bace2 | beta-site APP-cleaving enzyme 2 | 3.18 |
| 1438322_x_at | NM_010191 | Fdft1 | farnesyl diphosphate farnesyl transferase 1 | 3.17 |
| 1421038_a_at | NM_001163510 | Kcnn4 | potassium intermediate/small conductance calcium-activated channel, subfamily N, member 4 | 3.17 |
| 1417494_a_at | NM_001042611 | Cp | ceruloplasmin | 3.16 |
| 1450781_at | NM_010441 | Hmga2 | high mobility group AT-hook 2 | 3.16 |
| 1448130_at | NM_010191 | Fdft1 | farnesyl diphosphate farnesyl transferase 1 | 3.15 |
| 1422666_at | NM_001161844 | Cblc | Casitas B-lineage lymphoma c | 3.14 |
| 1429891_at | NM_029341 | Capsl | calcyphosine-like | 3.14 |
| 1418648_at | NM_028133 | Egln3 | EGL nine homolog 3 (C. elegans) | 3.09 |
| 1437767_s_at | NM_010241 | Aktip | thymoma viral proto-oncogene 1 interacting protein | 3.07 |
| 1449424_at | NM_013738 | Plek2 | pleckstrin 2 | 3.06 |
| 1421362_a_at | NM_001159544 | Frk | fyn-related kinase | 3.06 |
| 1453264_at | NM_028584 | Marveld3 | MARVEL (membrane-associating) domain containing 3 | 3.05 |
| 1455649_at | NM_001033149 | Ttc9 | tetratricopeptide repeat domain 9 | 3.05 |
| 1424180_a_at | NM_011869 | Med24 | mediator complex subunit 24 | 3.03 |
| 1417961_a_at | NM_009099 | Trim30a | tripartite motif-containing 30A | 3.02 |
| 1430234_at | NM_027843 | Arl14 | ADP-ribosylation factor-like 14 | 3.01 |
| 1426570_a_at | NM_001159544 | Frk | fyn-related kinase | 3.01 |
| 1427302_at | NM_134005 | Enpp3 | ectonucleotide pyrophosphatase/phosphodiesterase 3 | 3.01 |
| 1434210_s_at | NM_008377 | Lrig1 | leucine-rich repeats and immunoglobulin-like domains 1 | 3.00 |
| 1417374_at | NM_009447 | Tuba4a | tubulin, alpha 4A | 3.00 |
| 1430111_a_at | NM_001024468 | Bcat1 | branched chain aminotransferase 1, cytosolic | 3.00 |
| 1435050_at | NM_001033258 | D10Bwg1379e | DNA segment, Chr 10, Brigham & Women's Genetics 1379 expressed | 2.99 |
| 1439753_x_at | NM_011382 | Six4 | sine oculis-related homeobox 4 homolog (Drosophila) | 2.99 |
| 1425763_x_at | BC019425 | Igh-2 /// Igh-VJ558 /// LOC544903 | immunoglobulin heavy chain 2 (serum IgA) /// immunoglobulin heavy chain (J558 family) /// similar to immunoglobulin mu-chain | 2.99 |
| 1449896_at | NM_053015 | Mlph | melanophilin | 2.97 |
| 1439764_s_at | NM_183029 | Igf2bp2 | insulin-like growth factor 2 mRNA binding protein 2 | 2.96 |
| 1428527_at | NM_001190156 | Snx7 | sorting nexin 7 | 2.95 |
| 1434109_at | NM_172507 | Sh3bgrl2 | SH3 domain binding glutamic acid-rich protein like 2 | 2.93 |
| 1457157_at | NM_001177732 | Plch1 | phospholipase C, eta 1 | 2.91 |
| 1453442_at | AK009785 | 2310043M15Rik | RIKEN cDNA 2310043M15 gene | 2.90 |
| 1451407_at | NM_001177886 | Igsf5 | immunoglobulin superfamily, member 5 | 2.89 |
| 1452227_at | NM_172710 | Sel1l3 | sel-1 suppressor of lin-12-like 3 (C. elegans) | 2.88 |
| 1455162_at | NM_001145948 | Ttc39a | tetratricopeptide repeat domain 39A | 2.88 |
| 1421821_at | NM_010700 | Ldlr | low density lipoprotein receptor | 2.88 |
| 1453041_at | NM_178381 | Ano9 | anoctamin 9 | 2.87 |
| 1437466_at | NM_009655 | Alcam | activated leukocyte cell adhesion molecule | 2.87 |
| 1438645_x_at | NM_019517 | Bace2 | beta-site APP-cleaving enzyme 2 | 2.86 |
| 1418672_at | NM_013778 | Akr1c13 | aldo-keto reductase family 1, member C13 | 2.86 |
| 1450871_a_at | NM_001024468 | Bcat1 | branched chain aminotransferase 1, cytosolic | 2.86 |
| 1426663_s_at | NM_001177628 | Slc45a3 | solute carrier family 45, member 3 | 2.85 |
| 1449484_at | NM_011491 | Stc2 | stanniocalcin 2 | 2.85 |
| 1451775_s_at | NM_133990 | Il13ra1 | interleukin 13 receptor, alpha 1 | 2.84 |
| 1415993_at | NM_009270 | Sqle | squalene epoxidase | 2.84 |
| 1449893_a_at | NM_008377 | Lrig1 | leucine-rich repeats and immunoglobulin-like domains 1 | 2.83 |
| 1449740_s_at | NM_007883 | Dsg2 | desmoglein 2 | 2.83 |
| 1456140_at | NM_022987 | Zic5 | zinc finger protein of the cerebellum 5 | 2.82 |
| 1449036_at | NM_023270 | Rnf128 | ring finger protein 128 | 2.82 |
| 1429183_at | NM_026163 | Pkp2 | plakophilin 2 | 2.81 |
| 1419705_at | NM_181315 | Car5b | carbonic anhydrase 5b, mitochondrial | 2.78 |
| 1422612_at | NM_013820 | Hk2 | hexokinase 2 | 2.78 |
| 1424951_at | NM_025833 | Baiap2l1 | BAI1-associated protein 2-like 1 | 2.78 |
| 1425619_s_at | NM_007883 | Dsg2 | desmoglein 2 | 2.77 |
| 1450780_s_at | NM_010441 | Hmga2 | high mobility group AT-hook 2 | 2.77 |
| 1417797_a_at | NM_001083916 | 1810019J16Rik | RIKEN cDNA 1810019J16 gene | 2.77 |
| 1418488_s_at | NM_023663 | Ripk4 | receptor-interacting serine-threonine kinase 4 | 2.77 |
| 1434678_at | NM_134163 | Mbnl3 | muscleblind-like 3 (Drosophila) | 2.77 |
| 1452384_at | NM_134005 | Enpp3 | ectonucleotide pyrophosphatase/phosphodiesterase 3 | 2.76 |
| 1448871_at | NM_011950 | Mapk13 | mitogen-activated protein kinase 13 | 2.76 |
| 1427357_at | NM_028176 | Cda | cytidine deaminase | 2.76 |
| 1426942_at | NM_172393 | Aim1 | absent in melanoma 1 | 2.75 |
| 1459299_at | NM_177376 | Myo3b | myosin IIIB | 2.75 |
| 1419074_at | NM_026527 | Chac2 | ChaC, cation transport regulator homolog 2 (E. coli) | 2.75 |
| 1435033_at | NM_183019 | Arhgef4 | Rho guanine nucleotide exchange factor (GEF) 4 | 2.75 |
| 1417541_at | NM_008234 | Hells | helicase, lymphoid specific | 2.74 |
| 1422823_at | NM_007945 | Eps8 | epidermal growth factor receptor pathway substrate 8 | 2.74 |
| 1415834_at | NM_026268 | Dusp6 | dual specificity phosphatase 6 | 2.73 |
| 1454671_at | NM_153526 | Insig1 | insulin induced gene 1 | 2.73 |
| 1416579_a_at | NM_008532 | Epcam | epithelial cell adhesion molecule | 2.73 |
| 1427434_at | NM_010871 | Naip6 | NLR family, apoptosis inhibitory protein 6 | 2.73 |
| 1423364_a_at | NM_010241 | Aktip | thymoma viral proto-oncogene 1 interacting protein | 2.72 |
| 1437341_x_at | NM_001146318 | Cnp | 2',3'-cyclic nucleotide 3' phosphodiesterase | 2.72 |
| 1423933_a_at | NM_029639 | 1600029D21Rik | RIKEN cDNA 1600029D21 gene | 2.71 |
| 1451210_at | NM_015817 | Ppap2c | phosphatidic acid phosphatase type 2C | 2.70 |
| 1428386_at | NM_001033606 | Acsl3 | acyl-CoA synthetase long-chain family member 3 | 2.69 |
| 1452081_a_at | NM_030218 | 9130017N09Rik | RIKEN cDNA 9130017N09 gene | 2.68 |
| 1426301_at | NM_009655 | Alcam | activated leukocyte cell adhesion molecule | 2.68 |
| 1416237_at | NM_007962 | Mpzl2 | myelin protein zero-like 2 | 2.67 |
| 1448931_at | NM_007974 | F2rl1 | coagulation factor II (thrombin) receptor-like 1 | 2.67 |
| 1435581_at | NM_019517 | Bace2 | beta-site APP-cleaving enzyme 2 | 2.66 |
| 1452912_at | NM_183089 | Dscc1 | defective in sister chromatid cohesion 1 homolog (S. cerevisiae) | 2.66 |
| 1436570_at | NM_001195031 | Pag1 | phosphoprotein associated with glycosphingolipid microdomains 1 | 2.66 |
| 1425163_at | NM_145489 | AI661453 | expressed sequence AI661453 | 2.65 |
| 1427878_at | NM_001081365 | 0610010O12Rik | RIKEN cDNA 0610010O12 gene | 2.65 |
| 1423691_x_at | NM_031170 | Krt8 | keratin 8 | 2.65 |
| 1455709_at | NM_001168679 | Tspan8 | Tetraspanin 8 | 2.65 |
| 1450744_at | NM_138953 | Ell2 | elongation factor RNA polymerase II 2 | 2.64 |
| 1452458_s_at | NM_001081406 | Ppil5 | peptidylprolyl isomerase (cyclophilin) like 5 | 2.63 |
| 1460273_a_at | NM_001126182 | Naip2 | NLR family, apoptosis inhibitory protein 2 | 2.62 |
| 1456862_at | NM_011382 | Six4 | sine oculis-related homeobox 4 homolog (Drosophila) | 2.62 |
| 1449799_s_at | NM_026163 | Pkp2 | plakophilin 2 | 2.61 |
| 1436413_at | NM_001159544 | Frk | fyn-related kinase | 2.59 |
| 1420647_a_at | NM_031170 | Krt8 | keratin 8 | 2.59 |
| 1426914_at | NM_001038602 | Marveld2 | MARVEL (membrane-associating) domain containing 2 | 2.58 |
| 1420008_s_at | NM_170779 | Wwc1 | WW, C2 and coiled-coil domain containing 1 | 2.56 |
| 1418744_s_at | NM_021344 | Tesc | tescalcin | 2.56 |
| 1452771_s_at | NM_001033606 | Acsl3 | acyl-CoA synthetase long-chain family member 3 | 2.56 |
| 1450455_s_at | NM_013777 | Akr1c12 /// Akr1c13 | aldo-keto reductase family 1, member C12 /// aldo-keto reductase family 1, member C13 | 2.56 |
| 1427165_at | NM_133990 | Il13ra1 | interleukin 13 receptor, alpha 1 | 2.56 |
| 1427164_at | NM_133990 | Il13ra1 | interleukin 13 receptor, alpha 1 | 2.55 |
| 1417394_at | NM_010637 | Klf4 | Kruppel-like factor 4 (gut) | 2.55 |
| 1439476_at | NM_007883 | Dsg2 | desmoglein 2 | 2.54 |
| 1447621_s_at | NM_028261 | Tmem173 | transmembrane protein 173 | 2.54 |
| 1440866_at | NM_011163 | Eif2ak2 | eukaryotic translation initiation factor 2-alpha kinase 2 | 2.54 |
| 1454254_s_at | NM_029639 | 1600029D21Rik | RIKEN cDNA 1600029D21 gene | 2.54 |
| 1429527_a_at | NM_011636 | Plscr1 | phospholipid scramblase 1 | 2.54 |
| 1454681_at | NM_194055 | Esrp1 | epithelial splicing regulatory protein 1 | 2.53 |
| 1448265_x_at | NM_007962 | Mpzl2 | myelin protein zero-like 2 | 2.53 |
| 1427229_at | NM_008255 | Hmgcr | 3-hydroxy-3-methylglutaryl-Coenzyme A reductase | 2.53 |
| 1417738_at | NM_016899 | Rab25 | RAB25, member RAS oncogene family | 2.52 |
| 1459894_at | NM_027711 | Iqgap2 | IQ motif containing GTPase activating protein 2 | 2.52 |
| 1426569_a_at | NM_001159544 | Frk | fyn-related kinase | 2.52 |
| 1421156_a_at | NM_013505 | Dsc2 | desmocollin 2 | 2.52 |
| 1449296_a_at | NM_001146318 | Cnp | 2',3'-cyclic nucleotide 3' phosphodiesterase | 2.52 |
| 1441891_x_at | NM_029001 | Elovl7 | ELOVL family member 7, elongation of long chain fatty acids (yeast) | 2.51 |
| 1451363_a_at | NM_001093754 | Dennd2d | DENN/MADD domain containing 2D | 2.51 |
| 1427261_at | NM_170779 | Wwc1 | WW, C2 and coiled-coil domain containing 1 | 2.51 |
| 1449265_at | NM_009807 | Casp1 | caspase 1 | 2.50 |
| 1416627_at | NM_016907 | Spint1 | serine protease inhibitor, Kunitz type 1 | 2.49 |
| 1424090_at | NM_145535 | Sdcbp2 | syndecan binding protein (syntenin) 2 | 2.49 |
| 1417812_a_at | NM_008484 | Lamb3 | laminin, beta 3 | 2.49 |
| 1419503_at | NM_011491 | Stc2 | stanniocalcin 2 | 2.49 |
| 1449357_at | NM_025865 | 2310030G06Rik | RIKEN cDNA 2310030G06 gene | 2.48 |
| 1418318_at | NM_023270 | Rnf128 | ring finger protein 128 | 2.48 |
| 1417292_at | NM_008330 | Ifi47 | interferon gamma inducible protein 47 | 2.48 |
| 1429086_at | NM_026496 | Gm16136 /// Grhl2 /// LOC100503499 | predicted gene 16136 /// grainyhead-like 2 (Drosophila) /// hypothetical LOC100503499 | 2.47 |
| 1429678_at | NM_027482 | 5730508B09Rik | RIKEN cDNA 5730508B09 gene | 2.47 |
| 1418818_at | NM_009701 | Aqp5 | aquaporin 5 | 2.46 |
| 1443736_at | BG868839 | Gm13648 | predicted gene 13648 | 2.45 |
| 1439260_a_at | NM_134005 | Enpp3 | ectonucleotide pyrophosphatase/phosphodiesterase 3 | 2.44 |
| 1452291_at | NM_178407 | Arap2 | ArfGAP with RhoGAP domain, ankyrin repeat and PH domain 2 | 2.44 |
| 1436472_at | NM_172796 | Slfn9 | schlafen 9 | 2.43 |
| 1456219_at | NM_022987 | Zic5 | zinc finger protein of the cerebellum 5 | 2.42 |
| 1448227_at | NM_010346 | Grb7 | growth factor receptor bound protein 7 | 2.42 |
| 1433842_at | NM_001111311 | Lrrfip1 | leucine rich repeat (in FLII) interacting protein 1 | 2.42 |
| 1437190_at | NM_172891 | Styk1 | serine/threonine/tyrosine kinase 1 | 2.42 |
| 1427660_x_at | BC013496 | Gm10883 /// Gm1420 /// Gm7202 /// Igk-C /// Igk-J1 /// Igk-V28 | predicted gene 10883 /// predicted gene 1420 /// predicted gene 7202 /// immunoglobulin kappa chain, constant region /// immunoglobulin kappa chain, joining region, 1 /// immunoglobulin kappa chain variable 28 (V28) | 2.42 |
| 1427095_at | NM_133974 | Cdcp1 | CUB domain containing protein 1 | 2.40 |
| 1455803_at | NM_148933 | Slco4a1 | solute carrier organic anion transporter family, member 4a1 | 2.40 |
| 1422430_at | NM_001163359 | Fignl1 | fidgetin-like 1 | 2.40 |
| 1417483_at | NM_001159394 | Nfkbiz | nuclear factor of kappa light polypeptide gene enhancer in B-cells inhibitor, zeta | 2.40 |
| 1452417_x_at | AV057155 | Gm10883 /// Gm1420 /// Gm7202 /// Igk-C /// Igk-J1 /// Igk-V28 | predicted gene 10883 /// predicted gene 1420 /// predicted gene 7202 /// immunoglobulin kappa chain, constant region /// immunoglobulin kappa chain, joining region, 1 /// immunoglobulin kappa chain variable 28 (V28) | 2.40 |
| 1451243_at | NM_001159624 | Rnpep | arginyl aminopeptidase (aminopeptidase B) | 2.39 |
| 1416715_at | NM_001160012 | Gjb3 | gap junction protein, beta 3 | 2.39 |
| 1453480_at | NM_029921 | Tmem213 | transmembrane protein 213 | 2.38 |
| 1450010_at | NM_019657 | Hsd17b12 | hydroxysteroid (17-beta) dehydrogenase 12 | 2.38 |
| 1435989_x_at | NM_031170 | Krt8 | keratin 8 | 2.38 |
| 1433683_at | NM_176838 | Esrp2 | epithelial splicing regulatory protein 2 | 2.37 |
| 1425452_s_at | NM_029007 | Fam84a | family with sequence similarity 84, member A | 2.37 |
| 1459890_s_at | NM_198001 | 1110008P14Rik | RIKEN cDNA 1110008P14 gene | 2.37 |
| 1458070_at | NM_178594 | Vtcn1 | V-set domain containing T cell activation inhibitor 1 | 2.36 |
| 1450627_at | NM_020332 | Ank | progressive ankylosis | 2.35 |
| 1424351_at | NM_026323 | Wfdc2 | WAP four-disulfide core domain 2 | 2.35 |
| 1460177_at | NM_023149 | Cndp2 | CNDP dipeptidase 2 (metallopeptidase M20 family) | 2.35 |
| 1460406_at | NM_001033210 | Pls1 | plastin 1 (I-isoform) | 2.35 |
| 1418374_at | NM_008557 | Fxyd3 | FXYD domain-containing ion transport regulator 3 | 2.35 |
| 1421817_at | NM_010344 | Gsr | glutathione reductase | 2.35 |
| 1433408_a_at | NM_027290 | Mcm10 | minichromosome maintenance deficient 10 (S. cerevisiae) | 2.34 |
| 1429055_at | NM_001114312 | 4930506M07Rik | RIKEN cDNA 4930506M07 gene | 2.34 |
| 1418980_a_at | NM_001146318 | Cnp | 2',3'-cyclic nucleotide 3' phosphodiesterase | 2.33 |
| 1428680_at | NM_173370 | Cds1 | CDP-diacylglycerol synthase 1 | 2.33 |
| 1421816_at | NM_010344 | Gsr | glutathione reductase | 2.33 |
| 1437409_s_at | NM_001002268 | Gpr126 | G protein-coupled receptor 126 | 2.33 |
| 1452426_x_at | BC004065 | --- |  | 2.33 |
| 1426808_at | NM_001145953 | Lgals3 | lectin, galactose binding, soluble 3 | 2.32 |
| 1417178_at | NM_016867 | Gipc2 | GIPC PDZ domain containing family, member 2 | 2.32 |
| 1418724_at | NM_007686 | Cfi | complement component factor i | 2.32 |
| 1455825_s_at | NM_001159577 | Lnx1 | ligand of numb-protein X 1 | 2.32 |
| 1450886_at | NM_010353 | Gsg2 | germ cell-specific gene 2 | 2.32 |
| 1431821_a_at | NM_026146 | Eps8l1 | EPS8-like 1 | 2.31 |
| 1439560_x_at | XR_105752 | Gm5480 | predicted gene 5480 | 2.31 |
| 1417398_at | NM_025846 | Rras2 | related RAS viral (r-ras) oncogene homolog 2 | 2.29 |
| 1446530_at | BG069648 | --- |  | 2.29 |
| 1416236_a_at | NM_007962 | Mpzl2 | myelin protein zero-like 2 | 2.29 |
| 1452298_a_at | NM_201600 | Myo5b | myosin VB | 2.28 |
| 1416527_at | NM_026405 | Rab32 | RAB32, member RAS oncogene family | 2.28 |
| 1418924_at | NM_025886 | Rassf7 | Ras association (RalGDS/AF-6) domain family (N-terminal) member 7 | 2.28 |
| 1420028_s_at | NM_008563 | Mcm3 | minichromosome maintenance deficient 3 (S. cerevisiae) | 2.26 |
| 1420824_at | NM_013660 | Sema4d | sema domain, immunoglobulin domain (Ig), transmembrane domain (TM) and short cytoplasmic domain, (semaphorin) 4D | 2.26 |
| 1416046_a_at | NM_025799 | Fuca2 | fucosidase, alpha-L- 2, plasma | 2.26 |
| 1460190_at | NM_001110300 | Ap1m2 | adaptor protein complex AP-1, mu 2 subunit | 2.26 |
| 1450771_at | NM_010243 | Fut9 | fucosyltransferase 9 | 2.25 |
| 1425027_s_at | NM_145512 | Sft2d2 | SFT2 domain containing 2 | 2.25 |
| 1434278_at | NM_001164190 | Mtm1 | X-linked myotubular myopathy gene 1 | 2.24 |
| 1455896_a_at | NM_008430 | Kcnk1 | potassium channel, subfamily K, member 1 | 2.24 |
| 1427046_at | NM_026496 | Grhl2 | grainyhead-like 2 (Drosophila) | 2.24 |
| 1416632_at | NM_008615 | Me1 | malic enzyme 1, NADP(+)-dependent, cytosolic | 2.24 |
| 1438852_x_at | NM_008567 | Mcm6 | minichromosome maintenance deficient 6 (MIS5 homolog, S. pombe) (S. cerevisiae) | 2.24 |
| 1459904_at | NR_033217 | BC030870 | cDNA sequence BC030870 | 2.24 |
| 1427797_s_at | BF580235 | --- |  | 2.23 |
| 1425753_a_at | NM_001040691 | Ung | uracil DNA glycosylase | 2.23 |
| 1424235_at | NM_024180 | Ormdl2 | ORM1-like 2 (S. cerevisiae) | 2.23 |
| 1433885_at | NM_027711 | Iqgap2 | IQ motif containing GTPase activating protein 2 | 2.23 |
| 1419494_a_at | NM_001025261 | Tpd52 | tumor protein D52 | 2.22 |
| 1420712_a_at | NM_001110252 | Hpn | hepsin | 2.22 |
| 1449164_at | NM_009853 | Cd68 | CD68 antigen | 2.21 |
| 1448182_a_at | NM_009846 | Cd24a | CD24a antigen | 2.21 |
| 1416854_at | NM_011402 | Slc34a2 | solute carrier family 34 (sodium phosphate), member 2 | 2.21 |
| 1419427_at | NM_009971 | Csf3 | colony stimulating factor 3 (granulocyte) | 2.21 |
| 1416617_at | NM_080575 | Acss1 | acyl-CoA synthetase short-chain family member 1 | 2.21 |
| 1423411_at | NM_001127382 | Rbm47 | RNA binding motif protein 47 | 2.20 |
| 1433446_at | NM_145942 | Hmgcs1 | 3-hydroxy-3-methylglutaryl-Coenzyme A synthase 1 | 2.20 |
| 1428483_a_at | NM_025642 | 2610039C10Rik | RIKEN cDNA 2610039C10 gene | 2.19 |
| 1448261_at | NM_009864 | Cdh1 | cadherin 1 | 2.19 |
| 1424901_at | NM_028087 | Gcnt3 | glucosaminyl (N-acetyl) transferase 3, mucin type | 2.19 |
| 1421731_a_at | NM_007999 | Fen1 | flap structure specific endonuclease 1 | 2.19 |
| 1425767_a_at | NM_011382 | Six4 | sine oculis-related homeobox 4 homolog (Drosophila) | 2.19 |
| 1417395_at | NM_010637 | Klf4 | Kruppel-like factor 4 (gut) | 2.19 |
| 1454783_at | NM_133990 | Il13ra1 | interleukin 13 receptor, alpha 1 | 2.19 |
| 1441963_at | NM_197945 | Prosapip1 | ProSAPiP1 protein | 2.19 |
| 1417506_at | NM_020567 | Gmnn | geminin | 2.19 |
| 1435484_at | NM_017391 | Slc5a3 | solute carrier family 5 (inositol transporters), member 3 | 2.18 |
| 1438018_at | NM_030014 | Hook1 | hook homolog 1 (Drosophila) | 2.18 |
| 1451255_at | NM_001164184 | Lsr | lipolysis stimulated lipoprotein receptor | 2.18 |
| 1450738_at | NM_001109040 | Kif21a | kinesin family member 21A | 2.18 |
| 1424464_s_at | NM_133829 | Mfsd6 | major facilitator superfamily domain containing 6 | 2.18 |
| 1438097_at | NM_011227 | Rab20 | RAB20, member RAS oncogene family | 2.17 |
| 1433487_at | NM_007711 | Clcn3 | chloride channel 3 | 2.17 |
| 1421947_at | NM_001177556 | Gng12 | guanine nucleotide binding protein (G protein), gamma 12 | 2.17 |
| 1451690_a_at | NM_001122680 | Pvrl4 | poliovirus receptor-related 4 | 2.17 |
| 1424148_a_at | NM_145934 | Stap2 | signal transducing adaptor family member 2 | 2.16 |
| 1434158_at | NM_146041 | Gmds | GDP-mannose 4, 6-dehydratase | 2.16 |
| 1457248_x_at | NM_010476 | Hsd17b7 | hydroxysteroid (17-beta) dehydrogenase 7 | 2.15 |
| 1427911_at | NM_028261 | Tmem173 | transmembrane protein 173 | 2.15 |
| 1440910_at | NM_001077354 | C77370 | expressed sequence C77370 | 2.15 |
| 1427386_at | NM_001112744 | Arhgef16 | Rho guanine nucleotide exchange factor (GEF) 16 | 2.15 |
| 1418572_x_at | NM_001161746 | Tnfrsf12a | tumor necrosis factor receptor superfamily, member 12a | 2.15 |
| 1418908_at | NM_013626 | Pam | peptidylglycine alpha-amidating monooxygenase | 2.15 |
| 1419249_at | NM_011074 | Cdk14 | cyclin-dependent kinase 14 | 2.14 |
| 1442347_at | NM_001080926 | Lrp8 | low density lipoprotein receptor-related protein 8, apolipoprotein e receptor | 2.14 |
| 1416635_at | NM_020561 | Smpdl3a | sphingomyelin phosphodiesterase, acid-like 3A | 2.14 |
| 1433977_at | NM_018805 | Hs3st3b1 | heparan sulfate (glucosamine) 3-O-sulfotransferase 3B1 | 2.14 |
| 1451139_at | NM_028064 | Slc39a4 | solute carrier family 39 (zinc transporter), member 4 | 2.14 |
| 1423284_at | NM_026345 | Mansc1 | MANSC domain containing 1 | 2.14 |
| 1415811_at | NM_001111078 | Uhrf1 | ubiquitin-like, containing PHD and RING finger domains, 1 | 2.13 |
| 1418831_at | NM_001162924 | Pkp3 | plakophilin 3 | 2.13 |
| 1452367_at | NM_001164804 | Coro2a | coronin, actin binding protein 2A | 2.13 |
| 1451219_at | NM_145517 | Ormdl1 | ORM1-like 1 (S. cerevisiae) | 2.13 |
| 1418248_at | NM_013463 | Gla | galactosidase, alpha | 2.12 |
| 1425933_a_at | NM_001164363 | Nt5c2 | 5'-nucleotidase, cytosolic II | 2.12 |
| 1429649_at | NM_144902 | Slc35a3 | solute carrier family 35 (UDP-N-acetylglucosamine (UDP-GlcNAc) transporter), member 3 | 2.12 |
| 1453181_x_at | NM_011636 | Plscr1 | phospholipid scramblase 1 | 2.12 |
| 1422836_at | NM_134163 | Mbnl3 | muscleblind-like 3 (Drosophila) | 2.11 |
| 1416794_at | NM_019717 | Atl2 | atlastin GTPase 2 | 2.11 |
| 1455399_at | NM_001081047 | Cnksr1 | connector enhancer of kinase suppressor of Ras 1 | 2.11 |
| 1455814_x_at | NM_197982 | Ddx39 | DEAD (Asp-Glu-Ala-Asp) box polypeptide 39 | 2.11 |
| 1427178_at | NM_181820 | Tmc4 | transmembrane channel-like gene family 4 | 2.11 |
| 1428587_at | NM_153525 | Tmem41b | transmembrane protein 41B | 2.10 |
| 1433531_at | NM_001033600 | Acsl4 | acyl-CoA synthetase long-chain family member 4 | 2.10 |
| 1418294_at | NM_019427 | Epb4.1l4b | erythrocyte protein band 4.1-like 4b | 2.10 |
| 1433769_at | NM_001146059 | Als2cl | ALS2 C-terminal like | 2.10 |
| 1452507_at | NM_010057 | Dlx6 | distal-less homeobox 6 | 2.10 |
| 1422663_at | NM_011015 | Orc1 | origin recognition complex, subunit 1 | 2.10 |
| 1421968_a_at | NM_023647 | Nipa2 | non imprinted in Prader-Willi/Angelman syndrome 2 homolog (human) | 2.09 |
| 1422460_at | NM_019499 | Mad2l1 | MAD2 mitotic arrest deficient-like 1 (yeast) | 2.09 |
| 1448690_at | NM_008430 | Kcnk1 | potassium channel, subfamily K, member 1 | 2.09 |
| 1452213_at | NM_198292 | Tex2 | testis expressed gene 2 | 2.08 |
| 1451838_a_at | NM_001082976 | Tc2n | tandem C2 domains, nuclear | 2.08 |
| 1450850_at | NM_009510 | Ezr | ezrin | 2.08 |
| 1451065_a_at | NM_197982 | Ddx39 | DEAD (Asp-Glu-Ala-Asp) box polypeptide 39 | 2.08 |
| 1419475_a_at | NM_007914 | Ehf | ets homologous factor | 2.08 |
| 1438195_at | NM_175380 | Gpd1l | glycerol-3-phosphate dehydrogenase 1-like | 2.07 |
| 1424440_at | NM_080456 | Mrps6 | mitochondrial ribosomal protein S6 | 2.07 |
| 1451608_a_at | NM_146173 | Tspan33 | tetraspanin 33 | 2.07 |
| 1426263_at | NM_153112 | Cadm4 | cell adhesion molecule 4 | 2.06 |
| 1425140_at | NM_145381 | Lactb2 | lactamase, beta 2 | 2.06 |
| 1450011_at | NM_019657 | Hsd17b12 | hydroxysteroid (17-beta) dehydrogenase 12 | 2.06 |
| 1435446_a_at | NM_001146690 | Chpt1 | choline phosphotransferase 1 | 2.06 |
| 1434322_at | NM_174850 | Micall2 | MICAL-like 2 | 2.06 |
| 1419647_a_at | NM_133662 | Ier3 | immediate early response 3 | 2.06 |
| 1418895_at | NM_018773 | Skap2 | src family associated phosphoprotein 2 | 2.06 |
| 1416564_at | NM_011446 | Sox7 | SRY-box containing gene 7 | 2.06 |
| 1451261_s_at | NM_145934 | Stap2 | signal transducing adaptor family member 2 | 2.05 |
| 1428195_at | NM_001171000 | Ahcyl2 | S-adenosylhomocysteine hydrolase-like 2 | 2.05 |
| 1448609_at | NM_009437 | Tst | thiosulfate sulfurtransferase, mitochondrial | 2.04 |
| 1457869_at | NR_028520 | Gm10451 | predicted gene 10451 | 2.04 |
| 1442549_at | NM_134163 | Mbnl3 | muscleblind-like 3 (Drosophila) | 2.04 |
| 1424652_at | NM_145570 | Fam176a | family with sequence similarity 176, member A | 2.04 |
| 1436200_at | NM_028894 | Lonrf3 | LON peptidase N-terminal domain and ring finger 3 | 2.04 |
| 1428066_at | NM_207202 | Ccdc120 | coiled-coil domain containing 120 | 2.04 |
| 1431829_a_at | NM_023622 | Rgl3 | ral guanine nucleotide dissociation stimulator-like 3 | 2.04 |
| 1417871_at | NM_010476 | Hsd17b7 | hydroxysteroid (17-beta) dehydrogenase 7 | 2.04 |
| 1418925_at | NM_009886 | Celsr1 | cadherin, EGF LAG seven-pass G-type receptor 1 (flamingo homolog, Drosophila) | 2.04 |
| 1449402_at | NM_021715 | Chst7 | carbohydrate (N-acetylglucosamino) sulfotransferase 7 | 2.04 |
| 1434520_at | NM_172769 | Sc5d | sterol-C5-desaturase (fungal ERG3, delta-5-desaturase) homolog (S. cerevisae) | 2.03 |
| 1456956_at | NM_011770 | Ikzf2 | IKAROS family zinc finger 2 | 2.03 |
| 1431089_at | NM_016856 | Cpsf2 | cleavage and polyadenylation specific factor 2 | 2.03 |
| 1418026_at | NM_012012 | Exo1 | exonuclease 1 | 2.03 |
| 1449281_at | NM_008738 | Nrtn | neurturin | 2.03 |
| 1415810_at | NM_001111078 | Uhrf1 | ubiquitin-like, containing PHD and RING finger domains, 1 | 2.03 |
| 1420013_s_at | NM_146006 | Lss | lanosterol synthase | 2.02 |
| 1417953_at | NM_138587 | Fam3c | family with sequence similarity 3, member C | 2.02 |
| 1421836_at | NM_001198635 | Mtap7 | microtubule-associated protein 7 | 2.02 |
| 1455843_at | NM_010242 | Fut4 | fucosyltransferase 4 | 2.02 |
| 1448273_at | NM_008180 | Gss | glutathione synthetase | 2.02 |
| 1449855_s_at | NM_016723 | Uchl3 /// Uchl4 | ubiquitin carboxyl-terminal esterase L3 (ubiquitin thiolesterase) /// ubiquitin carboxyl-terminal esterase L4 | 2.02 |
| 1428737_s_at | NM_026240 | Gramd3 | GRAM domain containing 3 | 2.02 |
| 1423947_at | NM_198001 | 1110008P14Rik | RIKEN cDNA 1110008P14 gene | 2.01 |
| 1424905_a_at | NM_001166503 | Slc39a11 | solute carrier family 39 (metal ion transporter), member 11 | 2.01 |
| 1430332_a_at | NM_010368 | Gusb | glucuronidase, beta | 2.00 |
| 1429295_s_at | NM_027182 | Trip13 | thyroid hormone receptor interactor 13 | 2.00 |
| 1426260_a_at | NM_013701 | Ugt1a1 /// Ugt1a10 /// Ugt1a2 /// Ugt1a5 /// Ugt1a6a /// Ugt1a6b /// Ugt1a7c /// Ugt1a9 | UDP glucuronosyltransferase 1 family, polypeptide A1 /// UDP glycosyltransferase 1 family, polypeptide A10 /// UDP glucuronosyltransferase 1 family, polypeptide A2 /// UDP glucuronosyltransferase 1 family, polypeptide A5 /// UDP glucuronosyltransferase 1 family, polypeptide A6A /// UDP glucuronosyltransferase 1 family, polypeptide A6B /// UDP glucuronosyltransferase 1 family, polypeptide A7C /// UDP glucuronosyltransferase 1 family, polypeptide A9 | 2.00 |
| 1439428_x_at | NM_146041 | Gmds | GDP-mannose 4, 6-dehydratase | 2.00 |
| 1425108_a_at | NM_001033872 | Smagp | small cell adhesion glycoprotein | 2.00 |
| 1424046_at | NM_001113179 | Bub1 | budding uninhibited by benzimidazoles 1 homolog (S. cerevisiae) | 2.00 |
| 1436808_x_at | NM_008566 | Mcm5 | minichromosome maintenance deficient 5, cell division cycle 46 (S. cerevisiae) | 1.99 |
| 1447928_at | NM_181315 | Car5b | carbonic anhydrase 5b, mitochondrial | 1.99 |
| 1434211_at | NM_172507 | Sh3bgrl2 | SH3 domain binding glutamic acid-rich protein like 2 | 1.99 |
| 1451375_at | NM_007914 | Ehf | ets homologous factor | 1.99 |
| 1433486_at | NM_007711 | Clcn3 | chloride channel 3 | 1.99 |
| 1436186_at | NM_001013368 | E2f8 | E2F transcription factor 8 | 1.98 |
| 1449167_at | NM_013512 | Epb4.1l4a | erythrocyte protein band 4.1-like 4a | 1.98 |
| 1423643_at | NM_197982 | Ddx39 | DEAD (Asp-Glu-Ala-Asp) box polypeptide 39 | 1.98 |
| 1424612_at | NM_145469 | Nipal2 | NIPA-like domain containing 2 | 1.98 |
| 1434851_s_at | NM_177638 | Crb3 | crumbs homolog 3 (Drosophila) | 1.98 |
| 1421529_a_at | NM_001042513 | Txnrd1 | thioredoxin reductase 1 | 1.97 |
| 1448263_a_at | NM_023149 | Cndp2 | CNDP dipeptidase 2 (metallopeptidase M20 family) | 1.97 |
| 1426146_a_at | NM_001146690 | Chpt1 | choline phosphotransferase 1 | 1.97 |
| 1439494_at | NM_145551 | Slc5a9 | solute carrier family 5 (sodium/glucose cotransporter), member 9 | 1.97 |
| 1420502_at | NM_009121 | Sat1 | spermidine/spermine N1-acetyl transferase 1 | 1.97 |
| 1423700_at | NM_027009 | Rfc3 | replication factor C (activator 1) 3 | 1.97 |
| 1454809_at | NM_001111267 | Ncoa7 | nuclear receptor coactivator 7 | 1.96 |
| 1438168_x_at | NM_197982 | Ddx39 | DEAD (Asp-Glu-Ala-Asp) box polypeptide 39 | 1.96 |
| 1424409_at | NM_027998 | Cldn23 | claudin 23 | 1.96 |
| 1422293_a_at | NM_001142731 | Kctd1 | potassium channel tetramerisation domain containing 1 | 1.96 |
| 1423714_at | NM_024184 | Asf1b | ASF1 anti-silencing function 1 homolog B (S. cerevisiae) | 1.96 |
| 1429831_at | NM_031376 | Pik3ap1 | phosphoinositide-3-kinase adaptor protein 1 | 1.96 |
| 1418879_at | NM_027828 | Fam110c | family with sequence similarity 110, member C | 1.95 |
| 1457915_at | NM_177101 | 4833442J19Rik | RIKEN cDNA 4833442J19 gene | 1.95 |
| 1421340_at | NM_008580 | Map3k5 | mitogen-activated protein kinase kinase kinase 5 | 1.95 |
| 1460563_at | NM_030250 | Nus1 | nuclear undecaprenyl pyrophosphate synthase 1 homolog (S. cerevisiae) | 1.95 |
| 1428713_s_at | NM_178856 | Gins2 | GINS complex subunit 2 (Psf2 homolog) | 1.95 |
| 1416832_at | NM_001135149 | Slc39a8 | solute carrier family 39 (metal ion transporter), member 8 | 1.95 |
| 1425733_a_at | NM_007945 | Eps8 | epidermal growth factor receptor pathway substrate 8 | 1.95 |
| 1423465_at | NM_001113478 | Frrs1 | ferric-chelate reductase 1 | 1.94 |
| 1422462_at | NM_026024 | Ube2t | ubiquitin-conjugating enzyme E2T (putative) | 1.94 |
| 1426652_at | NM_008563 | Mcm3 | minichromosome maintenance deficient 3 (S. cerevisiae) | 1.94 |
| 1453072_at | NM_001134385 | Gpr160 | G protein-coupled receptor 160 | 1.94 |
| 1417640_at | NM_008339 | Cd79b | CD79B antigen | 1.94 |
| 1449966_s_at | NM_026908 | Cab39l | calcium binding protein 39-like | 1.94 |
| 1435031_at | NM_172541 | Tmem120a | transmembrane protein 120A | 1.93 |
| 1448127_at | NM_009103 | Rrm1 | ribonucleotide reductase M1 | 1.93 |
| 1427364_a_at | NM_013614 | Odc1 | ornithine decarboxylase, structural 1 | 1.93 |
| 1452232_at | NM_001167981 | Galnt7 | UDP-N-acetyl-alpha-D-galactosamine: polypeptide N-acetylgalactosaminyltransferase 7 | 1.92 |
| 1418571_at | NM_001161746 | Tnfrsf12a | tumor necrosis factor receptor superfamily, member 12a | 1.92 |
| 1452741_s_at | NM_001145820 | Gpd2 | glycerol phosphate dehydrogenase 2, mitochondrial | 1.92 |
| 1448743_at | NM_138744 | Ssx2ip | synovial sarcoma, X breakpoint 2 interacting protein | 1.92 |
| 1434580_at | NM_199016 | Enpp4 | ectonucleotide pyrophosphatase/phosphodiesterase 4 | 1.92 |
| 1449865_at | NM_009152 | Sema3a | sema domain, immunoglobulin domain (Ig), short basic domain, secreted, (semaphorin) 3A | 1.92 |
| 1425029_a_at | NM_001083341 | Mboat2 | membrane bound O-acyltransferase domain containing 2 | 1.92 |
| 1425581_s_at | NM_001167981 | Galnt7 | UDP-N-acetyl-alpha-D-galactosamine: polypeptide N-acetylgalactosaminyltransferase 7 | 1.92 |
| 1460698_a_at | NM_025468 | Sec11c | SEC11 homolog C (S. cerevisiae) | 1.92 |
| 1436199_at | NM_029077 | Trim14 | tripartite motif-containing 14 | 1.92 |
| 1426147_s_at | NM_001160096 | Cldn10 | claudin 10 | 1.91 |
| 1452210_at | NM_177372 | Dna2 | DNA replication helicase 2 homolog (yeast) | 1.91 |
| 1455030_at | NM_001135657 | Ptprj | protein tyrosine phosphatase, receptor type, J | 1.90 |
| 1426261_s_at | NM_013701 | Ugt1a1 /// Ugt1a10 /// Ugt1a2 /// Ugt1a5 /// Ugt1a6a /// Ugt1a6b /// Ugt1a7c /// Ugt1a9 | UDP glucuronosyltransferase 1 family, polypeptide A1 /// UDP glycosyltransferase 1 family, polypeptide A10 /// UDP glucuronosyltransferase 1 family, polypeptide A2 /// UDP glucuronosyltransferase 1 family, polypeptide A5 /// UDP glucuronosyltransferase 1 family, polypeptide A6A /// UDP glucuronosyltransferase 1 family, polypeptide A6B /// UDP glucuronosyltransferase 1 family, polypeptide A7C /// UDP glucuronosyltransferase 1 family, polypeptide A9 | 1.90 |
| 1440874_at | NM_172841 | Slco5a1 | solute carrier organic anion transporter family, member 5A1 | 1.90 |
| 1449049_at | NM_030682 | Tlr1 | toll-like receptor 1 | 1.90 |
| 1450677_at | NM_007691 | Chek1 | checkpoint kinase 1 homolog (S. pombe) | 1.90 |
| 1422444_at | NM_008397 | Itga6 | integrin alpha 6 | 1.90 |
| 1431304_a_at | NM_001042485 | Tmem183a | transmembrane protein 183A | 1.90 |
| 1418281_at | NM_011234 | Rad51 | RAD51 homolog (S. cerevisiae) | 1.90 |
| 1437103_at | NM_183029 | Igf2bp2 | insulin-like growth factor 2 mRNA binding protein 2 | 1.90 |
| 1448899_s_at | NM_009013 | Rad51ap1 | RAD51 associated protein 1 | 1.89 |
| 1426540_at | NM_028013 | Endod1 | endonuclease domain containing 1 | 1.89 |
| 1416831_at | NM_010893 | Neu1 | neuraminidase 1 | 1.89 |
| 1434304_s_at | NM_030250 | Nus1 | nuclear undecaprenyl pyrophosphate synthase 1 homolog (S. cerevisiae) | 1.89 |
| 1449839_at | NM_009810 | Casp3 | caspase 3 | 1.89 |
| 1432474_a_at | NM_027221 | Krtcap3 | keratinocyte associated protein 3 | 1.89 |
| 1422721_at | NM_031880 | Tnk1 | tyrosine kinase, non-receptor, 1 | 1.89 |
| 1440220_at | NM_008756 | Ocln | occludin | 1.89 |
| 1451935_a_at | NM_001082548 | Spint2 | serine protease inhibitor, Kunitz type 2 | 1.88 |
| 1416368_at | NM_010357 | Gsta4 | glutathione S-transferase, alpha 4 | 1.88 |
| 1457676_at | NM_001177845 | Tirap | toll-interleukin 1 receptor (TIR) domain-containing adaptor protein | 1.88 |
| 1443869_at | NM_178668 | Pde12 | phosphodiesterase 12 | 1.88 |
| 1418778_at | NM_025779 | Ccdc109b | coiled-coil domain containing 109B | 1.88 |
| 1426913_at | AK014742 | --- |  | 1.88 |
| 1449579_at | NM_013709 | Sh3yl1 | Sh3 domain YSC-like 1 | 1.88 |
| 1458591_at | NM_001017427 | Rasef | RAS and EF hand domain containing | 1.88 |
| 1426908_at | NM_001167981 | Galnt7 | UDP-N-acetyl-alpha-D-galactosamine: polypeptide N-acetylgalactosaminyltransferase 7 | 1.87 |
| 1429270_a_at | NM_001168244 | Syce2 | synaptonemal complex central element protein 2 | 1.87 |
| 1419154_at | NM_015775 | Tmprss2 | transmembrane protease, serine 2 | 1.87 |
| 1426133_a_at | NM_026913 | Mitd1 | MIT, microtubule interacting and transport, domain containing 1 | 1.87 |
| 1449348_at | NM_001164733 | Mpp6 | membrane protein, palmitoylated 6 (MAGUK p55 subfamily member 6) | 1.87 |
| 1443698_at | NM_001037713 | Xaf1 | XIAP associated factor 1 | 1.87 |
| 1438116_x_at | NM_012030 | Slc9a3r1 | solute carrier family 9 (sodium/hydrogen exchanger), member 3 regulator 1 | 1.86 |
| 1418911_s_at | NM_001033600 | Acsl4 | acyl-CoA synthetase long-chain family member 4 | 1.86 |
| 1452626_a_at | NM_026928 | 1810014F10Rik | RIKEN cDNA 1810014F10 gene | 1.86 |
| 1437549_at | XR_104591 | 2810408I11Rik | RIKEN cDNA 2810408I11 gene | 1.86 |
| 1429352_at | NM_026779 | Mocos | molybdenum cofactor sulfurase | 1.86 |
| 1429240_at | NM_133774 | Stard4 | StAR-related lipid transfer (START) domain containing 4 | 1.86 |
| 1416386_a_at | NM_010749 | M6pr | mannose-6-phosphate receptor, cation dependent | 1.86 |
| 1425179_at | NM_009171 | Shmt1 | serine hydroxymethyltransferase 1 (soluble) | 1.86 |
| 1450131_a_at | NM_138653 | Bspry | B-box and SPRY domain containing | 1.86 |
| 1455477_s_at | NM_001164557 | Pdzk1ip1 | PDZK1 interacting protein 1 | 1.86 |
| 1441931_x_at | NM_008180 | Gss | glutathione synthetase | 1.85 |
| 1429262_at | NM_028478 | Rassf6 | Ras association (RalGDS/AF-6) domain family member 6 | 1.85 |
| 1449044_at | NM_025380 | Eef1e1 | eukaryotic translation elongation factor 1 epsilon 1 | 1.85 |
| 1433854_at | NM_177592 | Tmem164 | Transmembrane protein 164 | 1.85 |
| 1438115_a_at | NM_012030 | Slc9a3r1 | solute carrier family 9 (sodium/hydrogen exchanger), member 3 regulator 1 | 1.85 |
| 1456146_at | BI735554 | 2210411A11Rik | RIKEN cDNA 2210411A11 gene | 1.84 |
| 1449545_at | NM_008005 | Fgf18 | fibroblast growth factor 18 | 1.84 |
| 1453314_x_at | NM_025642 | 2610039C10Rik | RIKEN cDNA 2610039C10 gene | 1.84 |
| 1419153_at | NM_026515 | 2810417H13Rik | RIKEN cDNA 2810417H13 gene | 1.84 |
| 1429317_at | NM_001081054 | Qrsl1 | glutaminyl-tRNA synthase (glutamine-hydrolyzing)-like 1 | 1.84 |
| 1455285_at | NM_175090 | Slc31a1 | solute carrier family 31, member 1 | 1.84 |
| 1416743_at | NM_133806 | LOC640502 /// Uap1 | UDP-N-acetylhexosamine pyrophosphorylase-like /// UDP-N-acetylglucosamine pyrophosphorylase 1 | 1.84 |
| 1452152_at | NM_001045520 | Clint1 | clathrin interactor 1 | 1.84 |
| 1419474_a_at | NM_007914 | Ehf | ets homologous factor | 1.84 |
| 1447585_s_at | NM_080456 | Mrps6 | mitochondrial ribosomal protein S6 | 1.83 |
| 1456280_at | NM_175554 | Clspn | claspin homolog (Xenopus laevis) | 1.83 |
| 1416120_at | NM_009104 | Rrm2 | ribonucleotide reductase M2 | 1.83 |
| 1424924_at | NM_153055 | Sec63 | SEC63-like (S. cerevisiae) | 1.83 |
| 1424136_a_at | NM_001110129 | LOC433064 /// Ppih | peptidyl-prolyl cis-trans isomerase H-like /// peptidyl prolyl isomerase H | 1.82 |
| 1417010_at | NM_001012330 | Zfp238 | zinc finger protein 238 | 1.82 |
| 1448967_at | NM_025623 | Nipsnap3b | nipsnap homolog 3B (C. elegans) | 1.82 |
| 1452881_at | NM_178856 | Gins2 | GINS complex subunit 2 (Psf2 homolog) | 1.82 |
| 1427940_s_at | NM_019660 | Mycbp | c-myc binding protein | 1.82 |
| 1460431_at | NM_001136484 | Gcnt1 | glucosaminyl (N-acetyl) transferase 1, core 2 | 1.82 |
| 1424076_at | NM_025638 | Gdpd1 | glycerophosphodiester phosphodiesterase domain containing 1 | 1.82 |
| 1420646_at | NM_030250 | Nus1 | nuclear undecaprenyl pyrophosphate synthase 1 homolog (S. cerevisiae) | 1.81 |
| 1448627_s_at | NM_023209 | Pbk | PDZ binding kinase | 1.81 |
| 1428142_at | NM_023794 | Etv5 | ets variant gene 5 | 1.81 |
| 1417045_at | NM_007544 | Bid | BH3 interacting domain death agonist | 1.81 |
| 1417268_at | NM_009841 | Cd14 | CD14 antigen | 1.81 |
| 1431464_a_at | NM_016881 | Pmm2 | phosphomannomutase 2 | 1.81 |
| 1444479_at | AW540004 | --- |  | 1.80 |
| 1424110_a_at | NM_008704 | Nme1 | non-metastatic cells 1, protein (NM23A) expressed in | 1.80 |
| 1435155_at | NM_001037711 | Cgn | cingulin | 1.80 |
| 1423937_at | NM_027008 | Kctd5 | potassium channel tetramerisation domain containing 5 | 1.80 |
| 1418919_at | NM_028232 | Sgol1 | shugoshin-like 1 (S. pombe) | 1.80 |
| 1432538_a_at | NM_027009 | Rfc3 | replication factor C (activator 1) 3 | 1.80 |
| 1452504_s_at | NM_028836 | Ctbs | chitobiase, di-N-acetyl- | 1.80 |
| 1432016_a_at | NM_029573 | Idh3a | isocitrate dehydrogenase 3 (NAD+) alpha | 1.80 |
| 1429294_at | NM_027182 | Trip13 | thyroid hormone receptor interactor 13 | 1.80 |
| 1451764_at | NM_028584 | Marveld3 | MARVEL (membrane-associating) domain containing 3 | 1.80 |
| 1434200_at | AV270842 | BC010981 | cDNA sequence BC010981 | 1.80 |
| 1419700_a_at | NM_001163577 | Prom1 | prominin 1 | 1.80 |
| 1434094_at | NM_172383 | Tmem125 | transmembrane protein 125 | 1.80 |
| 1428834_at | NM_176933 | Dusp4 | dual specificity phosphatase 4 | 1.80 |
| 1418527_a_at | NM_001080387 | Srsf10 | serine/arginine-rich splicing factor 10 | 1.79 |
| 1421835_at | NM_001198635 | Mtap7 | microtubule-associated protein 7 | 1.79 |
| 1416410_at | NM_008776 | Pafah1b3 | platelet-activating factor acetylhydrolase, isoform 1b, subunit 3 | 1.79 |
| 1430483_a_at | NM_024246 | Tmem79 | transmembrane protein 79 | 1.79 |
| 1452493_s_at | NM_010460 | Hoxb7 /// Hoxb8 | homeobox B7 /// homeobox B8 | 1.78 |
| 1426415_a_at | NM_009546 | Trim25 | tripartite motif-containing 25 | 1.78 |
| 1419493_a_at | NM_001025261 | Tpd52 | tumor protein D52 | 1.78 |
| 1423686_a_at | NM_001170911 | Prr13 | proline rich 13 | 1.78 |
| 1418208_at | NM_011040 | Pax8 | paired box gene 8 | 1.78 |
| 1448865_at | NM_010476 | Hsd17b7 | hydroxysteroid (17-beta) dehydrogenase 7 | 1.78 |
| 1431692_a_at | NM_001161844 | Cblc | Casitas B-lineage lymphoma c | 1.78 |
| 1416667_at | NM_007898 | Ebp | phenylalkylamine Ca2+ antagonist (emopamil) binding protein | 1.78 |
| 1437327_x_at | NM_001163035 | Enoph1 | enolase-phosphatase 1 | 1.78 |
| 1438196_at | NM_175380 | Gpd1l | glycerol-3-phosphate dehydrogenase 1-like | 1.78 |
| 1426599_a_at | NM_011400 | Slc2a1 | solute carrier family 2 (facilitated glucose transporter), member 1 | 1.78 |
| 1418520_at | NM_009443 | Tgoln1 | trans-golgi network protein | 1.78 |
| 1428593_at | NM_029368 | 1700029F09Rik | RIKEN cDNA 1700029F09 gene | 1.78 |
| 1435046_at | BM240223 | --- |  | 1.77 |
| 1426626_at | NM_026816 | Gtf2f2 | general transcription factor IIF, polypeptide 2 | 1.77 |
| 1455699_at | NM_001024468 | Bcat1 | branched chain aminotransferase 1, cytosolic | 1.77 |
| 1435819_at | BB833422 | --- |  | 1.77 |
| 1433505_a_at | NM_001122768 | Lrrc8d | leucine rich repeat containing 8D | 1.77 |
| 1419172_at | NM_010049 | Dhfr | dihydrofolate reductase | 1.77 |
| 1450846_at | NM_025824 | Bzw1 | basic leucine zipper and W2 domains 1 | 1.77 |
| 1419298_at | NM_173006 | Pon3 | paraoxonase 3 | 1.77 |
| 1451912_a_at | NM_001164259 | Fgfrl1 | fibroblast growth factor receptor-like 1 | 1.76 |
| 1418681_at | NM_026247 | Alg13 | asparagine-linked glycosylation 13 homolog (S. cerevisiae) | 1.76 |
| 1448844_at | NM_025558 | Cyb5b | cytochrome b5 type B | 1.76 |
| 1450862_at | NM_001122958 | Rad54l | RAD54 like (S. cerevisiae) | 1.76 |
| 1454736_at | NM_172939 | Ankrd57 | ankyrin repeat domain 57 | 1.76 |
| 1419452_at | NM_001159866 | Uchl5 | ubiquitin carboxyl-terminal esterase L5 | 1.76 |
| 1424119_at | NM_031869 | Prkab1 | protein kinase, AMP-activated, beta 1 non-catalytic subunit | 1.76 |
| 1434889_at | NM_172743 | Plekha7 | pleckstrin homology domain containing, family A member 7 | 1.76 |
| 1418487_at | NM_023663 | Ripk4 | receptor-interacting serine-threonine kinase 4 | 1.76 |
| 1452139_at | NM_145832 | Slc35c1 | solute carrier family 35, member C1 | 1.76 |
| 1460427_a_at | NM_001048175 | Adam28 | a disintegrin and metallopeptidase domain 28 | 1.76 |
| 1416939_at | NM_026438 | Ppa1 | pyrophosphatase (inorganic) 1 | 1.76 |
| 1430291_at | NM_177780 | Dock5 | dedicator of cytokinesis 5 | 1.76 |
| 1454607_s_at | NM_177420 | Psat1 | phosphoserine aminotransferase 1 | 1.75 |
| 1416735_at | NM_019734 | Asah1 | N-acylsphingosine amidohydrolase 1 | 1.75 |
| 1452016_at | NM_009663 | Alox5ap | arachidonate 5-lipoxygenase activating protein | 1.75 |
| 1420554_a_at | NM_133223 | Rac3 | RAS-related C3 botulinum substrate 3 | 1.75 |
| 1449708_s_at | NM_007691 | Chek1 | checkpoint kinase 1 homolog (S. pombe) | 1.75 |
| 1416229_at | NM_019437 | Rfk | riboflavin kinase | 1.75 |
| 1426653_at | NM_008563 | Mcm3 | minichromosome maintenance deficient 3 (S. cerevisiae) | 1.75 |
| 1455144_s_at | NM_001099288 | AU040829 | expressed sequence AU040829 | 1.75 |
| 1429863_at | NM_028894 | Lonrf3 | LON peptidase N-terminal domain and ring finger 3 | 1.75 |
| 1449705_x_at | NM_008563 | Mcm3 | minichromosome maintenance deficient 3 (S. cerevisiae) | 1.75 |
| 1452067_at | NM_001163687 | Naaa | N-acylethanolamine acid amidase | 1.75 |
| 1455995_at | NM_001033258 | D10Bwg1379e | DNA segment, Chr 10, Brigham & Women's Genetics 1379 expressed | 1.75 |
| 1438968_x_at | NM_001082548 | Spint2 | serine protease inhibitor, Kunitz type 2 | 1.75 |
| 1416489_at | NM_025951 | Pi4k2b | phosphatidylinositol 4-kinase type 2 beta | 1.74 |
| 1436735_at | NM_178925 | Nsun3 | NOL1/NOP2/Sun domain family member 3 | 1.74 |
| 1436302_at | NM_029736 | Slc10a7 | solute carrier family 10 (sodium/bile acid cotransporter family), member 7 | 1.74 |
| 1417434_at | NM_001145820 | Gpd2 | glycerol phosphate dehydrogenase 2, mitochondrial | 1.74 |
| 1452246_at | NM_017375 | Ostf1 | osteoclast stimulating factor 1 | 1.74 |
| 1425860_x_at | NM_001037841 | Cklf | chemokine-like factor | 1.74 |
| 1424118_a_at | NM_025565 | Spc25 | SPC25, NDC80 kinetochore complex component, homolog (S. cerevisiae) | 1.74 |
| 1434015_at | NM_001177627 | Slc2a6 | solute carrier family 2 (facilitated glucose transporter), member 6 | 1.73 |
| 1434666_at | NM_029508 | Pcgf5 | polycomb group ring finger 5 | 1.73 |
| 1427798_x_at | BF580235 | --- |  | 1.73 |
| 1417473_a_at | NM_026494 | Ppcs | phosphopantothenoylcysteine synthetase | 1.73 |
| 1452754_at | NM_029720 | Creld2 | cysteine-rich with EGF-like domains 2 | 1.73 |
| 1451660_a_at | NM_008269 | Hoxb6 | homeobox B6 | 1.73 |
| 1448777_at | NM_008564 | Mcm2 | minichromosome maintenance deficient 2 mitotin (S. cerevisiae) | 1.73 |
| 1425193_at | NM_023220 | 2010106G01Rik | RIKEN cDNA 2010106G01 gene | 1.73 |
| 1427077_a_at | NM_001035854 | Ap2b1 | adaptor-related protein complex 2, beta 1 subunit | 1.72 |
| 1437694_at | NM_001164624 | Zfp809 | Zinc finger protein 809 | 1.72 |
| 1423122_at | NM_027106 | Avpi1 | arginine vasopressin-induced 1 | 1.72 |
| 1424156_at | NM_001139516 | Rbl1 | retinoblastoma-like 1 (p107) | 1.72 |
| 1430295_at | NM_010303 | Gna13 | guanine nucleotide binding protein, alpha 13 | 1.72 |
| 1450947_at | NM_025572 | 2610528J11Rik | RIKEN cDNA 2610528J11 gene | 1.72 |
| 1419350_at | NM_001167991 | Hook2 | hook homolog 2 (Drosophila) | 1.72 |
| 1448904_at | NM_138587 | Fam3c | family with sequence similarity 3, member C | 1.72 |
| 1416706_at | NM_025683 | Rpe | ribulose-5-phosphate-3-epimerase | 1.72 |
| 1438445_at | NM_028175 | Lrrc8e | leucine rich repeat containing 8 family, member E | 1.72 |
| 1428307_at | NM_028031 | Zdhhc13 | zinc finger, DHHC domain containing 13 | 1.72 |
| 1419024_at | NM_011200 | Ptp4a1 | protein tyrosine phosphatase 4a1 | 1.72 |
| 1430135_at | NM_010062 | Dnase2a | deoxyribonuclease II alpha | 1.71 |
| 1416896_at | NM_009097 | Rps6ka1 | ribosomal protein S6 kinase polypeptide 1 | 1.71 |
| 1460224_at | NM_026386 | Snx2 | sorting nexin 2 | 1.71 |
| 1417346_at | NM_023258 | Pycard | PYD and CARD domain containing | 1.71 |
| 1448013_at | NM_183225 | Usp24 | ubiquitin specific peptidase 24 | 1.71 |
| 1435951_at | NM_028736 | Grip1 | glutamate receptor interacting protein 1 | 1.71 |
| 1415945_at | NM_008566 | Mcm5 | minichromosome maintenance deficient 5, cell division cycle 46 (S. cerevisiae) | 1.71 |
| 1429261_at | NM_029384 | 2210411K11Rik | RIKEN cDNA 2210411K11 gene | 1.71 |
| 1416208_at | NM_001038589 | Usp14 | ubiquitin specific peptidase 14 | 1.71 |
| 1416689_at | NM_011656 | Tuft1 | tuftelin 1 | 1.70 |
| 1419270_a_at | NM_001159646 | Dut | deoxyuridine triphosphatase | 1.70 |
| 1422445_at | NM_008397 | Itga6 | integrin alpha 6 | 1.70 |
| 1450735_at | NM_025443 | Pno1 | partner of NOB1 homolog (S. cerevisiae) | 1.70 |
| 1420868_s_at | NM_019770 | Tmed2 | transmembrane emp24 domain trafficking protein 2 | 1.70 |
| 1435807_at | NM_009861 | Cdc42 | cell division cycle 42 homolog (S. cerevisiae) | 1.70 |
| 1422629_s_at | NM_001077595 | Shroom3 | shroom family member 3 | 1.70 |
| 1448689_at | NM_025846 | Rras2 | related RAS viral (r-ras) oncogene homolog 2 | 1.70 |
| 1426634_at | NM_145551 | Slc5a9 | solute carrier family 5 (sodium/glucose cotransporter), member 9 | 1.70 |
| 1426473_at | NM_134081 | Dnajc9 | DnaJ (Hsp40) homolog, subfamily C, member 9 | 1.70 |
| 1426744_at | NM_033218 | Srebf2 | sterol regulatory element binding factor 2 | 1.70 |
| 1448232_x_at | NM_009448 | Gm5620 /// Gm6682 /// Tuba1a /// Tuba1b /// Tuba1c | predicted gene 5620 /// predicted gene 6682 /// tubulin, alpha 1A /// tubulin, alpha 1B /// tubulin, alpha 1C | 1.69 |
| 1424698_s_at | NM_145523 | Gca | grancalcin | 1.69 |
| 1454963_at | NM_178668 | Pde12 | phosphodiesterase 12 | 1.69 |
| 1418983_at | NM_001005784 | Inadl | InaD-like (Drosophila) | 1.69 |
| 1423040_at | NM_025824 | Bzw1 | basic leucine zipper and W2 domains 1 | 1.69 |
| 1452902_at | NM_183286 | Dhrs13 | dehydrogenase/reductase (SDR family) member 13 | 1.69 |
| 1427147_at | NM_199467 | F730047E07Rik | RIKEN cDNA F730047E07 gene | 1.69 |
| 1449369_at | NM_015775 | Tmprss2 | transmembrane protease, serine 2 | 1.69 |
| 1428132_at | NM_001038708 | Cdc42se1 | CDC42 small effector 1 | 1.69 |
| 1452734_at | NM_001083938 | Rnaset2a /// Rnaset2b | ribonuclease T2A /// ribonuclease T2B | 1.69 |
| 1420831_at | NM_001024945 | Qsox1 | quiescin Q6 sulfhydryl oxidase 1 | 1.69 |
| 1424144_at | NM_026014 | Cdt1 | chromatin licensing and DNA replication factor 1 | 1.68 |
| 1455726_at | NM_001033236 | Gm71 | predicted gene 71 | 1.68 |
| 1423877_at | NM_028083 | Chaf1b | chromatin assembly factor 1, subunit B (p60) | 1.68 |
| 1426649_at | NM_021436 | Tmeff1 | transmembrane protein with EGF-like and two follistatin-like domains 1 | 1.68 |
| 1451374_x_at | NM_001037841 | Cklf | chemokine-like factor | 1.68 |
| 1438761_a_at | NM_013614 | Odc1 | ornithine decarboxylase, structural 1 | 1.68 |
| 1451318_a_at | NM_001111096 | Lyn | Yamaguchi sarcoma viral (v-yes-1) oncogene homolog | 1.68 |
| 1419239_at | NM_011760 | Zfp54 | zinc finger protein 54 | 1.68 |
| 1439830_at | NM_008580 | Map3k5 | mitogen-activated protein kinase kinase kinase 5 | 1.68 |
| 1433398_at | NM_015759 | Fgd3 | FYVE, RhoGEF and PH domain containing 3 | 1.67 |
| 1450745_at | NM_052993 | C1galt1 | core 1 synthase, glycoprotein-N-acetylgalactosamine 3-beta-galactosyltransferase, 1 | 1.67 |
| 1425104_at | NM_001142731 | Kctd1 | potassium channel tetramerisation domain containing 1 | 1.67 |
| 1449414_at | NM_013843 | Zfp53 | zinc finger protein 53 | 1.67 |
| 1427567_a_at | NM_022314 | Tpm3 | tropomyosin 3, gamma | 1.67 |
| 1431028_a_at | NM_001114339 | Pank1 | pantothenate kinase 1 | 1.67 |
| 1417405_at | NM_021547 | Stard3 | START domain containing 3 | 1.67 |
| 1429832_at | NM_001110129 | Ppih | peptidyl prolyl isomerase H | 1.67 |
| 1451346_at | NM_024433 | Mtap | methylthioadenosine phosphorylase | 1.67 |
| 1453030_at | NM_001100451 | Msl2 | male-specific lethal 2 homolog (Drosophila) | 1.67 |
| 1425107_a_at | NM_001113386 | Lifr | leukemia inhibitory factor receptor | 1.67 |
| 1451828_a_at | NM_001033600 | Acsl4 | acyl-CoA synthetase long-chain family member 4 | 1.67 |
| 1422483_a_at | NM_007808 | Cycs | cytochrome c, somatic | 1.66 |
| 1449186_at | NM_026121 | Bag4 | BCL2-associated athanogene 4 | 1.66 |
| 1418988_at | NM_001161825 | Pex7 | peroxisomal biogenesis factor 7 | 1.66 |
| 1418432_at | NM_133781 | Cab39 | calcium binding protein 39 | 1.66 |
| 1421013_at | NM_019640 | Pitpnb | phosphatidylinositol transfer protein, beta | 1.66 |
| 1456008_at | NM_028175 | Lrrc8e | leucine rich repeat containing 8 family, member E | 1.66 |
| 1432180_at | NM_001039507 | Lipe | lipase, hormone sensitive | 1.66 |
| 1425470_at | BC003855 | --- |  | 1.66 |
| 1425568_a_at | NM_028975 | Tmem33 | transmembrane protein 33 | 1.66 |
| 1425837_a_at | NM_009834 | Ccrn4l | CCR4 carbon catabolite repression 4-like (S. cerevisiae) | 1.66 |
| 1453726_s_at | NM_001040396 | 2810407C02Rik | RIKEN cDNA 2810407C02 gene | 1.66 |
| 1435076_at | NM_027773 | Fam57a | family with sequence similarity 57, member A | 1.66 |
| 1432188_s_at | NM_145706 | Nup43 | nucleoporin 43 | 1.66 |
| 1417648_s_at | NM_024225 | Snx5 | sorting nexin 5 | 1.66 |
| 1452678_a_at | NM_172404 | Ccbl1 | cysteine conjugate-beta lyase 1 | 1.65 |
| 1433506_at | NM_001122768 | Lrrc8d | leucine rich repeat containing 8D | 1.65 |
| 1456861_at | NR_028589 | Gm14005 | predicted gene 14005 | 1.65 |
| 1421052_a_at | NM_009214 | Sms | spermine synthase | 1.65 |
| 1448354_at | NM_008062 | G6pdx | glucose-6-phosphate dehydrogenase X-linked | 1.65 |
| 1423357_at | NM_026010 | Lipt2 | lipoyl(octanoyl) transferase 2 (putative) | 1.65 |
| 1448794_s_at | NM_009584 | Dnajc2 | DnaJ (Hsp40) homolog, subfamily C, member 2 | 1.65 |
| 1438712_at | NM_001093754 | Dennd2d | DENN/MADD domain containing 2D | 1.65 |
| 1429158_at | NM_175127 | Fbxo28 | F-box protein 28 | 1.65 |
| 1421102_a_at | NM_009498 | Vamp3 | vesicle-associated membrane protein 3 | 1.65 |
| 1439275_s_at | BG069453 | 9530010C24Rik | RIKEN cDNA 9530010C24 gene | 1.65 |
| 1428323_at | NM_001145820 | Gpd2 | glycerol phosphate dehydrogenase 2, mitochondrial | 1.65 |
| 1424991_s_at | NM_021288 | Tyms /// Tyms-ps | thymidylate synthase /// thymidylate synthase, pseudogene | 1.65 |
| 1438337_x_at | NM_177162 | 9930032O22Rik | RIKEN cDNA 9930032O22 gene | 1.65 |
| 1436541_at | NM_001168218 | 2310008H09Rik | RIKEN cDNA 2310008H09 gene | 1.65 |
| 1458599_at | BB009155 | --- |  | 1.65 |
| 1419057_at | NM_019810 | Slc5a1 | solute carrier family 5 (sodium/glucose cotransporter), member 1 | 1.64 |
| 1436502_at | NM_001005863 | Mtus1 | mitochondrial tumor suppressor 1 | 1.64 |
| 1448922_at | NM_024438 | Dusp19 | dual specificity phosphatase 19 | 1.64 |
| 1460619_at | NM_172499 | Mfsd9 | major facilitator superfamily domain containing 9 | 1.64 |
| 1415878_at | NM_009103 | Rrm1 | ribonucleotide reductase M1 | 1.64 |
| 1424030_at | NM_001161406 | Grhl1 | grainyhead-like 1 (Drosophila) | 1.64 |
| 1415823_at | NM_009128 | Scd2 | stearoyl-Coenzyme A desaturase 2 | 1.64 |
| 1428061_at | NM_026115 | Hat1 | histone aminotransferase 1 | 1.64 |
| 1449300_at | NM_001163332 | Cttnbp2nl | CTTNBP2 N-terminal like | 1.64 |
| 1439214_a_at | NM_007466 | Api5 | apoptosis inhibitor 5 | 1.64 |
| 1452214_at | NM_001039090 | Skil | SKI-like | 1.64 |
| 1452203_at | NM_028696 | Obfc2a | oligonucleotide/oligosaccharide-binding fold containing 2A | 1.64 |
| 1429418_at | NM_001122989 | Cdc14b | CDC14 cell division cycle 14 homolog B (S. cerevisiae) | 1.64 |
| 1440227_at | NM_017391 | Slc5a3 | solute carrier family 5 (inositol transporters), member 3 | 1.64 |
| 1440200_at | NM_021416 | Fam184b | family with sequence similarity 184, member B | 1.63 |
| 1429321_at | NM_001033135 | Rnf149 | ring finger protein 149 | 1.63 |
| 1448317_at | NM_025480 | Tmem128 | transmembrane protein 128 | 1.63 |
| 1417114_at | NM_011818 | Gmcl1 | germ cell-less homolog 1 (Drosophila) | 1.63 |
| 1431087_at | NM_026282 | Spc24 | SPC24, NDC80 kinetochore complex component, homolog (S. cerevisiae) | 1.63 |
| 1419820_at | NM_153179 | Pkhd1 | polycystic kidney and hepatic disease 1 | 1.63 |
| 1437198_at | NM_010716 | Lig3 | ligase III, DNA, ATP-dependent | 1.63 |
| 1418984_at | NM_001005784 | Inadl | InaD-like (Drosophila) | 1.63 |
| 1429533_at | NM_029673 | Immt | inner membrane protein, mitochondrial | 1.63 |
| 1416449_x_at | NM_011503 | Stxbp2 | syntaxin binding protein 2 | 1.63 |
| 1421089_a_at | NM_028228 | Pinx1 | PIN2/TERF1 interacting, telomerase inhibitor 1 | 1.63 |
| 1415828_a_at | NM_030685 | Serp1 | stress-associated endoplasmic reticulum protein 1 | 1.63 |
| 1438095_x_at | NM_153570 | Noc4l | Nucleolar complex associated 4 homolog (S. cerevisiae) | 1.62 |
| 1428378_at | NM_028421 | Zc3hav1 | zinc finger CCCH type, antiviral 1 | 1.62 |
| 1430053_a_at | NM_025942 | Ola1 | Obg-like ATPase 1 | 1.62 |
| 1425503_at | NM_008105 | Gcnt2 | glucosaminyl (N-acetyl) transferase 2, I-branching enzyme | 1.62 |
| 1426612_at | NM_025372 | Tipin | timeless interacting protein | 1.62 |
| 1431802_a_at | NM_027652 | Ept1 | ethanolaminephosphotransferase 1 (CDP-ethanolamine-specific) | 1.62 |
| 1424047_at | NM_172733 | Dera | 2-deoxyribose-5-phosphate aldolase homolog (C. elegans) | 1.62 |
| 1424383_at | NM_145402 | Tmem51 | transmembrane protein 51 | 1.62 |
| 1448659_at | NM_007611 | Casp7 | caspase 7 | 1.62 |
| 1457404_at | NM_001159394 | Nfkbiz | Nuclear factor of kappa light polypeptide gene enhancer in B-cells inhibitor, zeta | 1.62 |
| 1451064_a_at | NM_177420 | Psat1 | phosphoserine aminotransferase 1 | 1.62 |
| 1453365_at | NM_001038621 | Rabgap1l | RAB GTPase activating protein 1-like | 1.62 |
| 1450860_at | NM_024434 | Lap3 | leucine aminopeptidase 3 | 1.62 |
| 1416028_a_at | NM_008258 | Hn1 | hematological and neurological expressed sequence 1 | 1.62 |
| 1424202_at | NM_001039088 | Seh1l | SEH1-like (S. cerevisiae | 1.62 |
| 1424809_at | NM_177638 | Crb3 | crumbs homolog 3 (Drosophila) | 1.62 |
| 1449107_at | NM_027722 | Nudt4 | nudix (nucleoside diphosphate linked moiety X)-type motif 4 | 1.62 |
| 1431101_a_at | NM_175283 | Srd5a1 | steroid 5 alpha-reductase 1 | 1.61 |
| 1425058_at | NM_153063 | Zfp472 | zinc finger protein 472 | 1.61 |
| 1428151_x_at | NM_172404 | Ccbl1 | cysteine conjugate-beta lyase 1 | 1.61 |
| 1448591_at | NM_021281 | Ctss | cathepsin S | 1.61 |
| 1442465_s_at | NM_009261 | Strbp | spermatid perinuclear RNA binding protein | 1.61 |
| 1418685_at | NM_001177845 | Tirap | toll-interleukin 1 receptor (TIR) domain-containing adaptor protein | 1.61 |
| 1452273_at | NM_001168253 | Fam83h | family with sequence similarity 83, member H | 1.61 |
| 1454006_a_at | NM_178648 | Ubxn8 | UBX domain protein 8 | 1.61 |
| 1450387_s_at | NM_001177602 | Ak4 | adenylate kinase 4 | 1.61 |
| 1426062_a_at | NM_007611 | Casp7 | caspase 7 | 1.61 |
| 1430148_at | NM_011226 | Rab19 | RAB19, member RAS oncogene family | 1.61 |
| 1418371_at | NM_001168471 | Dynll2 | dynein light chain LC8-type 2 | 1.61 |
| 1456012_x_at | NM_001083938 | Rnaset2a /// Rnaset2b | ribonuclease T2A /// ribonuclease T2B | 1.61 |
| 1423642_at | NM_146116 | Tubb2c | tubulin, beta 2C | 1.61 |
| 1418102_at | NM_008235 | Hes1 | hairy and enhancer of split 1 (Drosophila) | 1.61 |
| 1416230_at | NM_019437 | Rfk | riboflavin kinase | 1.61 |
| 1428736_at | NM_026240 | Gramd3 | GRAM domain containing 3 | 1.61 |
| 1417162_at | NM_027154 | Tmbim1 | transmembrane BAX inhibitor motif containing 1 | 1.61 |
| 1433599_at | NM_013815 | Baz1a | bromodomain adjacent to zinc finger domain 1A | 1.61 |
| 1416258_at | NM_009387 | Tk1 | thymidine kinase 1 | 1.60 |
| 1426737_at | NM_001130008 | Gspt1 | G1 to S phase transition 1 | 1.60 |
| 1455851_at | NM_007555 | Bmp5 | bone morphogenetic protein 5 | 1.60 |
| 1430139_at | NM_008234 | Hells | helicase, lymphoid specific | 1.60 |
| 1429648_at | NM_144902 | Slc35a3 | solute carrier family 35 (UDP-N-acetylglucosamine (UDP-GlcNAc) transporter), member 3 | 1.60 |
| 1434882_at | NM_026002 | Mtdh | metadherin | 1.60 |
| 1416705_at | NM_025683 | Rpe | ribulose-5-phosphate-3-epimerase | 1.60 |
| 1419730_at | NM_001171000 | Ahcyl2 | S-adenosylhomocysteine hydrolase-like 2 | 1.60 |
| 1422917_at | NM_023580 | Epha1 | Eph receptor A1 | 1.60 |
| 1426934_at | NM_001163592 | Nhsl1 | NHS-like 1 | 1.60 |
| 1416251_at | NM_008567 | Mcm6 | minichromosome maintenance deficient 6 (MIS5 homolog, S. pombe) (S. cerevisiae) | 1.60 |
| 1451508_at | NM_001040399 | Larp1b | La ribonucleoprotein domain family, member 1B | 1.60 |
| 1426601_at | NM_153062 | Slc37a1 | solute carrier family 37 (glycerol-3-phosphate transporter), member 1 | 1.60 |
| 1416235_at | NM_133807 | Lrrc59 | leucine rich repeat containing 59 | 1.60 |
| 1434062_at | NM_001038621 | Rabgap1l | RAB GTPase activating protein 1-like | 1.60 |
| 1424127_at | NM_010165 | Eya2 | eyes absent 2 homolog (Drosophila) | 1.59 |
| 1416214_at | NM_008565 | Mcm4 | minichromosome maintenance deficient 4 homolog (S. cerevisiae) | 1.59 |
| 1437709_x_at | NM_145607 | Ttc13 | tetratricopeptide repeat domain 13 | 1.59 |
| 1427844_a_at | NM_009883 | Cebpb | CCAAT/enhancer binding protein (C/EBP), beta | 1.59 |
| 1433839_at | NM_153591 | Nars2 | asparaginyl-tRNA synthetase 2 (mitochondrial)(putative) | 1.59 |
| 1453149_at | NM_172402 | Slc25a32 | solute carrier family 25, member 32 | 1.59 |
| 1421065_at | NM_001048177 | Jak2 | Janus kinase 2 | 1.59 |
| 1417507_at | NM_007805 | Cyb561 | cytochrome b-561 | 1.59 |
| 1440299_at | NM_173386 | E330016A19Rik | RIKEN cDNA E330016A19 gene | 1.59 |
| 1424065_at | NM_138677 | Edem1 | ER degradation enhancer, mannosidase alpha-like 1 | 1.59 |
| 1428827_at | NM_001081102 | Whsc1 | Wolf-Hirschhorn syndrome candidate 1 (human) | 1.59 |
| 1417647_at | NM_024225 | Snx5 | sorting nexin 5 | 1.59 |
| 1454197_a_at | NM_023731 | Ccdc86 | coiled-coil domain containing 86 | 1.59 |
| 1436946_s_at | NM_010318 | Gm3150 /// Gng5 | predicted gene 3150 /// guanine nucleotide binding protein (G protein), gamma 5 | 1.59 |
| 1452608_at | NM_019660 | Mycbp | c-myc binding protein | 1.59 |
| 1455115_a_at | NM_177638 | Crb3 | crumbs homolog 3 (Drosophila) | 1.59 |
| 1419943_s_at | NM_172301 | Ccnb1 | cyclin B1 | 1.59 |
| 1440797_at | BB023120 | Dlx6os2 | Dlx6 opposite strand transcript 2 | 1.59 |
| 1428082_at | NM_027976 | Acsl5 | acyl-CoA synthetase long-chain family member 5 | 1.59 |
| 1460191_at | NM_019661 | Ykt6 | YKT6 homolog (S. Cerevisiae) | 1.59 |
| 1423174_a_at | NM_021409 | Pard6b | par-6 (partitioning defective 6) homolog beta (C. elegans) | 1.59 |
| 1433891_at | NM_172671 | Lgr4 | leucine-rich repeat-containing G protein-coupled receptor 4 | 1.58 |
| 1426572_at | NM_145494 | LOC100505264 /// Me2 | NAD-dependent malic enzyme, mitochondrial-like /// malic enzyme 2, NAD(+)-dependent, mitochondrial | 1.58 |
| 1421784_a_at | NM_007910 | Efna4 | ephrin A4 | 1.58 |
| 1417764_at | NM_025965 | Ssr1 | signal sequence receptor, alpha | 1.58 |
| 1433921_s_at | NM_001047433 | Dph3 | DPH3 homolog (KTI11, S. cerevisiae) | 1.58 |
| 1455102_at | NM_001024526 | Larp4 | La ribonucleoprotein domain family, member 4 | 1.58 |
| 1425603_at | NM_001098271 | Tmem176a | transmembrane protein 176A | 1.58 |
| 1455504_a_at | NM_018810 | Mkrn1 | makorin, ring finger protein, 1 | 1.58 |
| 1430221_at | NM_027834 | 9130008F23Rik | RIKEN cDNA 9130008F23 gene | 1.58 |
| 1419968_at | NM_001077354 | C77370 | expressed sequence C77370 | 1.58 |
| 1428671_at | NM_028179 | 2200002D01Rik | RIKEN cDNA 2200002D01 gene | 1.58 |
| 1441811_x_at | NM_001098271 | Tmem176a | transmembrane protein 176A | 1.58 |
| 1429087_at | NM_001013577 | 1110054O05Rik | RIKEN cDNA 1110054O05 gene | 1.58 |
| 1448938_at | NM_026632 | Rpa3 | replication protein A3 | 1.58 |
| 1435114_at | NM_172598 | Wdhd1 | WD repeat and HMG-box DNA binding protein 1 | 1.58 |
| 1423088_at | NM_016963 | Tmod3 | tropomodulin 3 | 1.58 |
| 1417947_at | NM_011045 | Pcna | proliferating cell nuclear antigen | 1.58 |
| 1427938_at | NM_019660 | Mycbp | c-myc binding protein | 1.58 |
| 1423766_at | NM_026550 | Pak1ip1 | PAK1 interacting protein 1 | 1.58 |
| 1424866_at | NM_173754 | Usp43 | ubiquitin specific peptidase 43 | 1.57 |
| 1426411_a_at | NM_009261 | Strbp | spermatid perinuclear RNA binding protein | 1.57 |
| 1454161_s_at | NM_021446 | 0610007P14Rik | RIKEN cDNA 0610007P14 gene | 1.57 |
| 1431339_a_at | NM_025994 | Efhd2 | EF hand domain containing 2 | 1.57 |
| 1420403_at | NM_001036684 | Atp2b2 | ATPase, Ca++ transporting, plasma membrane 2 | 1.57 |
| 1422303_a_at | NM_009400 | Tnfrsf18 | tumor necrosis factor receptor superfamily, member 18 | 1.57 |
| 1432187_at | NM_145706 | Nup43 | nucleoporin 43 | 1.57 |
| 1425279_at | NM_001163794 | Pdik1l | PDLIM1 interacting kinase 1 like | 1.57 |
| 1426893_at | NM_153560 | Fam102a | family with sequence similarity 102, member A | 1.57 |
| 1437772_s_at | NM_024243 | Fuca1 | fucosidase, alpha-L- 1, tissue | 1.57 |
| 1429284_at | NM_178061 | Mobkl2b | MOB1, Mps One Binder kinase activator-like 2B (yeast) | 1.57 |
| 1452226_at | NM_173867 | Rcc2 | regulator of chromosome condensation 2 | 1.57 |
| 1422707_at | NM_001146200 | Pik3cg | phosphoinositide-3-kinase, catalytic, gamma polypeptide | 1.57 |
| 1422327_s_at | NM_008062 | G6pd2 /// G6pdx | glucose-6-phosphate dehydrogenase 2 /// glucose-6-phosphate dehydrogenase X-linked | 1.57 |
| 1428794_at | NM_001029936 | Specc1 | sperm antigen with calponin homology and coiled-coil domains 1 | 1.57 |
| 1460623_at | NM_018773 | Skap2 | src family associated phosphoprotein 2 | 1.57 |
| 1423372_at | NM_025882 | Pole4 | polymerase (DNA-directed), epsilon 4 (p12 subunit) | 1.57 |
| 1426600_at | NM_011400 | Slc2a1 | solute carrier family 2 (facilitated glucose transporter), member 1 | 1.57 |
| 1416346_at | NM_013898 | Timm8a1 | translocase of inner mitochondrial membrane 8 homolog a1 (yeast) | 1.57 |
| 1452008_at | NM_027238 | Ttc39b | tetratricopeptide repeat domain 39B | 1.57 |
| 1452009_at | NM_027238 | Ttc39b | tetratricopeptide repeat domain 39B | 1.57 |
| 1424324_at | NM_001081222 | Esco1 | establishment of cohesion 1 homolog 1 (S. cerevisiae) | 1.56 |
| 1427539_a_at | NM_025635 | Zwint | ZW10 interactor | 1.56 |
| 1458440_at | NM_001029936 | Specc1 | sperm antigen with calponin homology and coiled-coil domains 1 | 1.56 |
| 1423524_at | NM_025979 | Mastl | microtubule associated serine/threonine kinase-like | 1.56 |
| 1440883_at | NM_001080548 | Usp6nl | USP6 N-terminal like | 1.56 |
| 1420088_at | NM_010907 | Nfkbia | nuclear factor of kappa light polypeptide gene enhancer in B-cells inhibitor, alpha | 1.56 |
| 1421491_a_at | NM_029478 | Tmem49 | transmembrane protein 49 | 1.56 |
| 1417990_at | NM_028104 | Ppp1r14d | protein phosphatase 1, regulatory (inhibitor) subunit 14D | 1.56 |
| 1449271_a_at | NM_019487 | Hebp2 | heme binding protein 2 | 1.56 |
| 1446720_at | AW547545 | --- |  | 1.56 |
| 1436947_a_at | NM_016792 | Txnl1 | thioredoxin-like 1 | 1.56 |
| 1419486_at | NM_008592 | Foxc1 | forkhead box C1 | 1.56 |
| 1437348_at | NM_175127 | Fbxo28 | F-box protein 28 | 1.55 |
| 1426894_s_at | NM_153560 | Fam102a | family with sequence similarity 102, member A | 1.55 |
| 1418387_at | NM_023773 | Mphosph8 | M-phase phosphoprotein 8 | 1.55 |
| 1433938_at | NM_173378 | Trp53bp2 | transformation related protein 53 binding protein 2 | 1.55 |
| 1416480_a_at | NM_001112668 | Gm9790 /// Higd1a | predicted gene 9790 /// HIG1 domain family, member 1A | 1.55 |
| 1416132_at | NM_133766 | Efr3a | EFR3 homolog A (S. cerevisiae) | 1.55 |
| 1435571_at | NM_001093749 | Mpzl3 | myelin protein zero-like 3 | 1.55 |
| 1453067_at | NM_027263 | Apitd1 | apoptosis-inducing, TAF9-like domain 1 | 1.55 |
| 1433696_at | NM_198937 | Hn1l | hematological and neurological expressed 1-like | 1.55 |
| 1417599_at | NM_133983 | Cd276 | CD276 antigen | 1.55 |
| 1426986_at | NM_176836 | Fam76b | family with sequence similarity 76, member B | 1.55 |
| 1434016_at | NM_199143 | Znrf2 | zinc and ring finger 2 | 1.55 |
| 1417457_at | NM_025415 | Cks2 | CDC28 protein kinase regulatory subunit 2 | 1.55 |
| 1426395_s_at | NM_144545 | Eif3j | eukaryotic translation initiation factor 3, subunit J | 1.55 |
| 1428069_at | NM_025866 | Cdca7 | cell division cycle associated 7 | 1.55 |
| 1453332_at | NM_001093759 | 2410002O22Rik | RIKEN cDNA 2410002O22 gene | 1.55 |
| 1416226_at | NM_023142 | Arpc1b | actin related protein 2/3 complex, subunit 1B | 1.55 |
| 1422508_at | NM_007508 | Atp6v1a | ATPase, H+ transporting, lysosomal V1 subunit A | 1.55 |
| 1415684_at | NM_053069 | Atg5 | autophagy-related 5 (yeast) | 1.55 |
| 1440676_at | NM_173425 | Fam124b | family with sequence similarity 124, member B | 1.55 |
| 1419737_a_at | NM_001136069 | Ldha | lactate dehydrogenase A | 1.55 |
| 1451345_at | NM_024433 | Mtap | methylthioadenosine phosphorylase | 1.55 |
| 1430134_a_at | NM_198246 | Yars2 | tyrosyl-tRNA synthetase 2 (mitochondrial) | 1.55 |
| 1419819_s_at | NM_153055 | Sec63 | SEC63-like (S. cerevisiae) | 1.55 |
| 1417192_at | NM_138599 | Tomm70a | translocase of outer mitochondrial membrane 70 homolog A (yeast) | 1.55 |
| 1424222_s_at | NM_009011 | Rad23b | RAD23b homolog (S. cerevisiae) | 1.54 |
| 1417293_at | NM_015818 | Hs6st1 | heparan sulfate 6-O-sulfotransferase 1 | 1.54 |
| 1420707_a_at | NM_011634 | Traip | TRAF-interacting protein | 1.54 |
| 1423985_at | NM_010318 | Gng5 | guanine nucleotide binding protein (G protein), gamma 5 | 1.54 |
| 1424579_at | NM_144902 | Slc35a3 | solute carrier family 35 (UDP-N-acetylglucosamine (UDP-GlcNAc) transporter), member 3 | 1.54 |
| 1437632_at | NM_001048208 | Med14 | mediator complex subunit 14 | 1.54 |
| 1440050_at | NM_001042593 | Hbs1l | Hbs1-like (S. cerevisiae) | 1.54 |
| 1425844_a_at | NM_011884 | Rngtt | RNA guanylyltransferase and 5'-phosphatase | 1.54 |
| 1417514_at | NM_138744 | Ssx2ip | synovial sarcoma, X breakpoint 2 interacting protein | 1.54 |
| 1458218_s_at | NM_001122759 | Pde7a | phosphodiesterase 7A | 1.54 |
| 1423519_at | NM_133722 | Fam108c | family with sequence similarity 108, member C | 1.54 |
| 1424343_a_at | NM_010120 | Eif1a | eukaryotic translation initiation factor 1A | 1.54 |
| 1440205_at | NM_026021 | Zmynd19 | zinc finger, MYND domain containing 19 | 1.54 |
| 1416942_at | NM_030711 | Erap1 | endoplasmic reticulum aminopeptidase 1 | 1.54 |
| 1423461_a_at | NM_011908 | Ubl3 | ubiquitin-like 3 | 1.54 |
| 1423938_at | NM_145438 | Llgl2 | lethal giant larvae homolog 2 (Drosophila) | 1.54 |
| 1417787_at | NM_015789 | Dkkl1 | dickkopf-like 1 | 1.53 |
| 1419163_s_at | NM_008929 | Dnajc3 | DnaJ (Hsp40) homolog, subfamily C, member 3 | 1.53 |
| 1424502_at | NM_146050 | Oit1 | oncoprotein induced transcript 1 | 1.53 |
| 1430289_a_at | NM_027432 | Wdr77 | WD repeat domain 77 | 1.53 |
| 1422443_at | NM_133216 | Xpnpep1 | X-prolyl aminopeptidase (aminopeptidase P) 1, soluble | 1.53 |
| 1431176_at | NM_025519 | Chmp4c | chromatin modifying protein 4C | 1.53 |
| 1448126_at | NM_019643 | Fam60a | family with sequence similarity 60, member A | 1.53 |
| 1444508_s_at | NM_001162485 | Arrdc1 | arrestin domain containing 1 | 1.53 |
| 1450113_at | NM_019579 | Mpp5 | membrane protein, palmitoylated 5 (MAGUK p55 subfamily member 5) | 1.53 |
| 1427094_at | NM_011133 | Pole2 | polymerase (DNA directed), epsilon 2 (p59 subunit) | 1.53 |
| 1435140_at | NM_031156 | Ide | insulin degrading enzyme | 1.53 |
| 1449252_at | NM_027828 | Fam110c | family with sequence similarity 110, member C | 1.53 |
| 1431506_s_at | NM_001110129 | Ppih | peptidyl prolyl isomerase H | 1.53 |
| 1448564_at | NM_011870 | Cib1 | calcium and integrin binding 1 (calmyrin) | 1.53 |
| 1448213_at | NM_010730 | Anxa1 | annexin A1 | 1.53 |
| 1428400_at | NM_026955 | 2200002K05Rik | RIKEN cDNA 2200002K05 gene | 1.53 |
| 1424981_at | NM_029447 | Nln | neurolysin (metallopeptidase M3 family) | 1.52 |
| 1436922_at | NM_001081406 | Ppil5 | peptidylprolyl isomerase (cyclophilin) like 5 | 1.52 |
| 1423924_s_at | NM_145928 | Tspan14 | tetraspanin 14 | 1.52 |
| 1428775_at | NM_025373 | 1110008L16Rik | RIKEN cDNA 1110008L16 gene | 1.52 |
| 1441629_at | BB451601 | --- |  | 1.52 |
| 1435815_at | NM_001018087 | Ldoc1 | leucine zipper, down-regulated in cancer 1 | 1.52 |
| 1418816_at | NM_024190 | Chmp1b | chromatin modifying protein 1B | 1.52 |
| 1424389_at | NM_170591 | Nupl1 | nucleoporin like 1 | 1.52 |
| 1416893_at | NM_025626 | Fam107b | family with sequence similarity 107, member B | 1.52 |
| 1423501_at | NM_001146176 | Max | Max protein | 1.52 |
| 1437553_at | NM_001166457 | Brcc3 | BRCA1/BRCA2-containing complex, subunit 3 | 1.52 |
| 1424378_at | NM_145554 | Ldlrap1 | low density lipoprotein receptor adaptor protein 1 | 1.52 |
| 1458823_at | BG071205 | --- |  | 1.52 |
| 1423322_at | NM_011699 | Lin7c | lin-7 homolog C (C. elegans) | 1.52 |
| 1448441_at | NM_016904 | Cks1b | CDC28 protein kinase 1b | 1.52 |
| 1430515_s_at | NM_026276 | Aasdhppt | aminoadipate-semialdehyde dehydrogenase-phosphopantetheinyl transferase | 1.52 |
| 1448722_s_at | NM_026494 | Ppcs | phosphopantothenoylcysteine synthetase | 1.52 |
| 1416128_at | NM_009448 | Gm5620 /// Gm6682 /// Tuba1a /// Tuba1b /// Tuba1c | predicted gene 5620 /// predicted gene 6682 /// tubulin, alpha 1A /// tubulin, alpha 1B /// tubulin, alpha 1C | 1.52 |
| 1452120_at | NM_027643 | Naa40 | N(alpha)-acetyltransferase 40, NatD catalytic subunit, homolog (S. cerevisiae) | 1.52 |
| 1436508_at | NM_175403 | Mlec | malectin | 1.51 |
| 1437013_x_at | NM_033617 | Atp6v0b | ATPase, H+ transporting, lysosomal V0 subunit B | 1.51 |
| 1421271_at | NM_021506 | Sh3rf1 | SH3 domain containing ring finger 1 | 1.51 |
| 1449211_at | NM_011794 | Bpnt1 /// LOC100504952 | bisphosphate 3'-nucleotidase 1 /// hypothetical LOC100504952 | 1.51 |
| 1428275_at | NM_001081119 | Abhd13 | abhydrolase domain containing 13 | 1.51 |
| 1428481_s_at | NM_026560 | Cdca8 | cell division cycle associated 8 | 1.51 |
| 1453782_at | NM_001164441 | Ankrd33b | ankyrin repeat domain 33B | 1.51 |
| 1450845_a_at | NM_025824 | Bzw1 | basic leucine zipper and W2 domains 1 | 1.51 |
| 1434079_s_at | NM_008564 | Mcm2 | minichromosome maintenance deficient 2 mitotin (S. cerevisiae) | 1.51 |
| 1423848_at | NM_026758 | Mphosph6 | M phase phosphoprotein 6 | 1.51 |
| 1418727_at | NM_133227 | Nup155 | nucleoporin 155 | 1.51 |
| 1439802_at | NM_001038635 | Stk35 | serine/threonine kinase 35 | 1.51 |
| 1453202_at | NM_173386 | E330016A19Rik | RIKEN cDNA E330016A19 gene | 1.51 |
| 1428544_at | NM_001081394 | 0610007L01Rik | RIKEN cDNA 0610007L01 gene | 1.51 |
| 1421322_a_at | NM_001159417 | Irf9 | interferon regulatory factor 9 | 1.51 |
| 1453052_at | NM_001163747 | Tmem192 | transmembrane protein 192 | 1.51 |
| 1422484_at | NM_007808 | Cycs | cytochrome c, somatic | 1.51 |
| 1449004_at | NM_023331 | Mrpl46 | mitochondrial ribosomal protein L46 | 1.51 |
| 1417952_at | NM_010008 | Cyp2j6 | cytochrome P450, family 2, subfamily j, polypeptide 6 | 1.51 |
| 1419322_at | NM_053072 | Fgd6 | FYVE, RhoGEF and PH domain containing 6 | 1.51 |
| 1418079_at | NM_011192 | Psme3 | proteaseome (prosome, macropain) 28 subunit, 3 | 1.51 |
| 1417773_at | NM_053179 | Nans | N-acetylneuraminic acid synthase (sialic acid synthase) | 1.50 |
| 1436008_at | NM_001025261 | Tpd52 | tumor protein D52 | 1.50 |
| 1450082_s_at | NM_023794 | Etv5 | ets variant gene 5 | 1.50 |
| 1439489_at | NM_181748 | Gpr120 | G protein-coupled receptor 120 | 1.50 |
| 1425715_at | NM_027163 | Il1f8 | interleukin 1 family, member 8 | 1.50 |
| 1451477_at | NM_001083918 | Gm13139 | predicted gene 13139 | 1.50 |
| 1448411_at | NM_011716 | Wfs1 | Wolfram syndrome 1 homolog (human) | 1.50 |
| 1452026_a_at | NM_023196 | Pla2g12a | phospholipase A2, group XIIA | 1.50 |
| 1439516_at | AW488471 | 2610201A13Rik | RIKEN cDNA 2610201A13 gene | 1.50 |
| 1452730_at | NR_003634 | Rps4y2 | ribosomal protein S4, Y-linked 2 | 1.50 |
| 1423299_at | NM_016792 | Txnl1 | thioredoxin-like 1 | 1.50 |
| 1450941_at | NM_001098227 | Sdcbp | syndecan binding protein | 1.50 |
| 1423673_at | NM_177630 | Ldoc1l | leucine zipper, down-regulated in cancer 1-like | -1.50 |
| 1449110_at | NM_007483 | Rhob | ras homolog gene family, member B | -1.50 |
| 1424051_at | NM_009932 | Col4a2 | collagen, type IV, alpha 2 | -1.50 |
| 1454711_at | NM_001081302 | Trio | triple functional domain (PTPRF interacting) | -1.50 |
| 1416289_at | NM_011122 | Plod1 | procollagen-lysine, 2-oxoglutarate 5-dioxygenase 1 | -1.50 |
| 1417218_at | NM_133746 | Calhm2 | calcium homeostasis modulator 2 | -1.50 |
| 1450981_at | NM_007725 | Cnn2 | calponin 2 | -1.50 |
| 1436546_at | NM_001163170 | Lix1l | Lix1-like | -1.50 |
| 1429579_at | BB266893 | 6330407I18Rik | RIKEN cDNA 6330407I18 gene | -1.50 |
| 1452660_s_at | NM_001161800 | Klhl7 | kelch-like 7 (Drosophila) | -1.50 |
| 1459847_x_at | NM_008115 | Gfra2 | glial cell line derived neurotrophic factor family receptor alpha 2 | -1.50 |
| 1440355_at | NM_175429 | Kctd12b | potassium channel tetramerisation domain containing 12b | -1.50 |
| 1421201_a_at | NM_001002272 | Tro | trophinin | -1.50 |
| 1442735_at | BM941420 | --- |  | -1.50 |
| 1455235_x_at | NM_008492 | Ldhb | lactate dehydrogenase B | -1.50 |
| 1459665_s_at | NM_010826 | Mrvi1 | MRV integration site 1 | -1.50 |
| 1427191_at | NM_173788 | Npr2 | natriuretic peptide receptor 2 | -1.50 |
| 1416863_at | NM_022419 | Abhd8 | abhydrolase domain containing 8 | -1.51 |
| 1424726_at | NM_144916 | Tmem150a | transmembrane protein 150A | -1.51 |
| 1422340_a_at | NM_009610 | Actg2 | actin, gamma 2, smooth muscle, enteric | -1.51 |
| 1415951_at | NM_001163481 | Fkbp10 | FK506 binding protein 10 | -1.51 |
| 1453102_at | NM_001172160 | Flrt3 | fibronectin leucine rich transmembrane protein 3 | -1.51 |
| 1436768_x_at | NM_001145921 | E130112L23Rik | RIKEN cDNA E130112L23 gene | -1.51 |
| 1427996_at | NM_153513 | BC028528 | cDNA sequence BC028528 | -1.51 |
| 1449851_at | NM_001159367 | Per1 | period homolog 1 (Drosophila) | -1.51 |
| 1432543_a_at | NM_021366 | Klf13 | Kruppel-like factor 13 | -1.51 |
| 1451969_s_at | NM_145619 | Parp3 | poly (ADP-ribose) polymerase family, member 3 | -1.51 |
| 1417505_s_at | NM_001099348 | Gm13305 /// Gm2002 /// Il11ra1 /// Il11ra2 | predicted gene 13305 /// predicted gene 2002 /// interleukin 11 receptor, alpha chain 1 /// interleukin 11 receptor, alpha chain 2 | -1.51 |
| 1438515_at | NM_001130169 | Zfp207 | zinc finger protein 207 | -1.51 |
| 1436354_at | NM_028258 | Dzip1l | DAZ interacting protein 1-like | -1.51 |
| 1439632_at | NM_013531 | Gnb4 | guanine nucleotide binding protein (G protein), beta 4 | -1.51 |
| 1448700_at | NM_008059 | G0s2 | G0/G1 switch gene 2 | -1.51 |
| 1453251_at | NM_133347 | Dhx30 | DEAH (Asp-Glu-Ala-His) box polypeptide 30 | -1.51 |
| 1436043_at | NM_009135 | Scn7a | sodium channel, voltage-gated, type VII, alpha | -1.51 |
| 1434752_at | XR_106210 | LOC100044751 | hypothetical LOC100044751 | -1.51 |
| 1439381_x_at | NM_183195 | Marveld1 | MARVEL (membrane-associating) domain containing 1 | -1.51 |
| 1419687_at | NM_134147 | Macrod1 | MACRO domain containing 1 | -1.51 |
| 1455040_s_at | NM_001163610 | Nhsl2 | NHS-like 2 | -1.51 |
| 1436363_a_at | NM_001081981 | Nfix | nuclear factor I/X | -1.51 |
| 1450027_at | NM_011520 | Sdc3 | syndecan 3 | -1.51 |
| 1454933_at | NM_172145 | Fam176b | family with sequence similarity 176, member B | -1.51 |
| 1426628_at | NM_145599 | Tmem184c | transmembrane protein 184C | -1.51 |
| 1448104_at | NM_134042 | Aldh6a1 | aldehyde dehydrogenase family 6, subfamily A1 | -1.51 |
| 1439549_at | NM_001081135 | Prrg3 | proline rich Gla (G-carboxyglutamic acid) 3 (transmembrane) | -1.52 |
| 1423878_at | NM_001048207 | Gypc | glycophorin C | -1.52 |
| 1420752_at | NM_030714 | Dtx3 | deltex 3 homolog (Drosophila) | -1.52 |
| 1440533_at | BF464033 | --- |  | -1.52 |
| 1424412_at | NM_001081079 | Ogfrl1 | opioid growth factor receptor-like 1 | -1.52 |
| 1450431_a_at | NM_010890 | Nedd4 | neural precursor cell expressed, developmentally down-regulated 4 | -1.52 |
| 1439852_at | BB036443 | --- |  | -1.52 |
| 1438861_at | NM_172870 | Bnc2 | basonuclin 2 | -1.52 |
| 1427044_a_at | NM_175007 | Amph | amphiphysin | -1.52 |
| 1424894_at | NM_026677 | Rab13 | RAB13, member RAS oncogene family | -1.52 |
| 1418475_at | NM_011325 | Scnn1b | sodium channel, nonvoltage-gated 1 beta | -1.52 |
| 1437902_s_at | NM_027852 | Rarres2 | retinoic acid receptor responder (tazarotene induced) 2 | -1.52 |
| 1451289_at | NM_001111051 | Dclk1 | doublecortin-like kinase 1 | -1.52 |
| 1416978_at | NM_010189 | Fcgrt | Fc receptor, IgG, alpha chain transporter | -1.52 |
| 1444646_at | NM_172870 | Bnc2 | basonuclin 2 | -1.52 |
| 1437122_at | NM_009741 | Bcl2 | B-cell leukemia/lymphoma 2 | -1.52 |
| 1451428_x_at | NM_001164564 | Egfl7 | EGF-like domain 7 | -1.52 |
| 1456623_at | NM_001164248 | Tpm1 | tropomyosin 1, alpha | -1.52 |
| 1452620_at | NM_028994 | Pck2 | phosphoenolpyruvate carboxykinase 2 (mitochondrial) | -1.52 |
| 1417804_at | NM_011242 | Rasgrp2 | RAS, guanyl releasing protein 2 | -1.52 |
| 1437197_at | NM_172752 | Sorbs2 | sorbin and SH3 domain containing 2 | -1.52 |
| 1452347_at | NM_001033713 | Mef2a | myocyte enhancer factor 2A | -1.52 |
| 1424041_s_at | NM_001097617 | C1s | complement component 1, s subcomponent | -1.52 |
| 1452792_at | NM_025943 | Dzip1 | DAZ interacting protein 1 | -1.52 |
| 1450939_at | NM_009848 | Entpd1 | ectonucleoside triphosphate diphosphohydrolase 1 | -1.52 |
| 1456602_at | NM_001033321 | Tmem231 | transmembrane protein 231 | -1.52 |
| 1459873_x_at | NM_030700 | Maged2 | Melanoma antigen, family D, 2 | -1.52 |
| 1418606_at | NM_013554 | Hoxd10 | homeobox D10 | -1.52 |
| 1435893_at | NM_001161420 | Vldlr | very low density lipoprotein receptor | -1.52 |
| 1436755_at | NM_172471 | Itih5 | inter-alpha (globulin) inhibitor H5 | -1.53 |
| 1446423_at | BB479853 | --- |  | -1.53 |
| 1421074_at | NM_007825 | Cyp7b1 | cytochrome P450, family 7, subfamily b, polypeptide 1 | -1.53 |
| 1435366_at | NM_001081022 | D430042O09Rik | RIKEN cDNA D430042O09 gene | -1.53 |
| 1459238_at | AV319481 | --- |  | -1.53 |
| 1421276_a_at | NM_133833 | Dst | dystonin | -1.53 |
| 1428372_at | NM_001001326 | St5 | suppression of tumorigenicity 5 | -1.53 |
| 1418534_at | NM_020510 | Fzd2 | frizzled homolog 2 (Drosophila) | -1.53 |
| 1455438_at | NM_021534 | Pxmp4 | peroxisomal membrane protein 4 | -1.53 |
| 1455562_at | NM_011438 | Sox12 | SRY-box containing gene 12 | -1.53 |
| 1452035_at | NM_009931 | Col4a1 | collagen, type IV, alpha 1 | -1.53 |
| 1455301_at | NM_001167860 | Wipf3 | WAS/WASL interacting protein family, member 3 | -1.53 |
| 1419739_at | NM_009416 | Tpm2 | tropomyosin 2, beta | -1.53 |
| 1437473_at | NM_001025577 | Maf | avian musculoaponeurotic fibrosarcoma (v-maf) AS42 oncogene homolog | -1.53 |
| 1428156_at | NM_001038637 | Gng2 | guanine nucleotide binding protein (G protein), gamma 2 | -1.53 |
| 1418939_at | NM_008250 | Hlx | H2.0-like homeobox | -1.53 |
| 1417806_at | NM_001081984 | Popdc2 | popeye domain containing 2 | -1.53 |
| 1416457_at | NM_001190449 | Ddah2 | dimethylarginine dimethylaminohydrolase 2 | -1.53 |
| 1442897_at | NM_146084 | Fam13b | family with sequence similarity 13, member B | -1.53 |
| 1422644_at | NM_015825 | Sh3bgr | SH3-binding domain glutamic acid-rich protein | -1.53 |
| 1450199_a_at | NM_138672 | Stab1 | stabilin 1 | -1.53 |
| 1452668_x_at | NM_172601 | Rab2b | RAB2B, member RAS oncogene family | -1.53 |
| 1419426_s_at | NM_001193666 | Ccl21a /// Ccl21b /// Ccl21c /// Gm10591 /// Gm13304 /// Gm1987 /// LOC100041593 | chemokine (C-C motif) ligand 21A (serine) /// chemokine (C-C motif) ligand 21B (leucine) /// chemokine (C-C motif) ligand 21C (leucine) /// predicted gene 10591 /// predicted gene 13304 /// predicted gene 1987 /// c-C motif chemokine 21a-like | -1.53 |
| 1447833_x_at | NM_001161799 | Mfap2 | microfibrillar-associated protein 2 | -1.53 |
| 1422437_at | NM_007737 | Col5a2 | collagen, type V, alpha 2 | -1.53 |
| 1453776_at | NM_133924 | Snx21 | sorting nexin family member 21 | -1.53 |
| 1438118_x_at | NM_011701 | Vim | vimentin | -1.54 |
| 1449815_a_at | NM_024186 | Ssbp2 | single-stranded DNA binding protein 2 | -1.54 |
| 1457434_s_at | NM_001012396 | Ptpla | protein tyrosine phosphatase-like (proline instead of catalytic arginine), member a | -1.54 |
| 1452474_a_at | NM_181728 | Art3 | ADP-ribosyltransferase 3 | -1.54 |
| 1426206_at | NM_028783 | Robo4 | roundabout homolog 4 (Drosophila) | -1.54 |
| 1436917_s_at | NM_153410 | Gpsm1 | G-protein signalling modulator 1 (AGS3-like, C. elegans) | -1.54 |
| 1416514_a_at | NM_007984 | Fscn1 | fascin homolog 1, actin bundling protein (Strongylocentrotus purpuratus) | -1.54 |
| 1434089_at | NM_001109975 | Synpo | synaptopodin | -1.54 |
| 1451506_at | NM_001170537 | Mef2c | myocyte enhancer factor 2C | -1.54 |
| 1426383_at | NM_001113333 | Cry2 | cryptochrome 2 (photolyase-like) | -1.54 |
| 1434115_at | NM_019707 | Cdh13 | cadherin 13 | -1.54 |
| 1424967_x_at | NM_001130174 | Tnnt2 | troponin T2, cardiac | -1.54 |
| 1438312_s_at | NM_008520 | Ltbp3 | latent transforming growth factor beta binding protein 3 | -1.54 |
| 1428097_at | NM_001001881 | 2510009E07Rik | RIKEN cDNA 2510009E07 gene | -1.54 |
| 1419356_at | NM_033563 | Klf7 | Kruppel-like factor 7 (ubiquitous) | -1.54 |
| 1415770_at | NM_031392 | Wdr6 | WD repeat domain 6 | -1.54 |
| 1421891_at | NM_009179 | St3gal2 | ST3 beta-galactoside alpha-2,3-sialyltransferase 2 | -1.54 |
| 1433770_at | NM_009955 | Dpysl2 | dihydropyrimidinase-like 2 | -1.54 |
| 1439278_at | NM_019778 | Zbtb20 | zinc finger and BTB domain containing 20 | -1.54 |
| 1428896_at | NM_026840 | Pdgfrl | platelet-derived growth factor receptor-like | -1.54 |
| 1455038_at | XM_906982 | 5730471H19Rik | RIKEN cDNA 5730471H19 gene | -1.54 |
| 1436849_x_at | NM_001159324 | Gaa | glucosidase, alpha, acid | -1.54 |
| 1449070_x_at | NM_133237 | Apcdd1 | adenomatosis polyposis coli down-regulated 1 | -1.54 |
| 1453163_at | NM_027892 | Ppp1r12a | protein phosphatase 1, regulatory (inhibitor) subunit 12A | -1.54 |
| 1426784_at | NM_172570 | Trim47 | tripartite motif-containing 47 | -1.54 |
| 1419745_at | NM_021493 | Arhgap23 | Rho GTPase activating protein 23 | -1.54 |
| 1418683_at | NM_011698 | Lin7b | lin-7 homolog B (C. elegans) | -1.54 |
| 1453266_at | NM_029348 | Zbtb4 | zinc finger and BTB domain containing 4 | -1.54 |
| 1435577_at | NM_010014 | Dab1 | disabled homolog 1 (Drosophila) | -1.55 |
| 1451063_at | NM_011505 | Stxbp4 | syntaxin binding protein 4 | -1.55 |
| 1453034_at | NM_001007568 | Zfp251 | zinc finger protein 251 | -1.55 |
| 1434943_at | NM_198108 | Morn4 | MORN repeat containing 4 | -1.55 |
| 1435029_at | NM_001164791 | B230120H23Rik | RIKEN cDNA B230120H23 gene | -1.55 |
| 1448154_at | NM_001145959 | Ndrg2 | N-myc downstream regulated gene 2 | -1.55 |
| 1416513_at | NM_008483 | Lamb2 | laminin, beta 2 | -1.55 |
| 1452968_at | NM_026778 | Cthrc1 | collagen triple helix repeat containing 1 | -1.55 |
| 1417937_at | NM_001190466 | Dact1 | dapper homolog 1, antagonist of beta-catenin (xenopus) | -1.55 |
| 1419378_a_at | NM_007503 | Fxyd2 | FXYD domain-containing ion transport regulator 2 | -1.55 |
| 1456110_at | NM_001081379 | Ankrd11 | ankyrin repeat domain 11 | -1.55 |
| 1456180_at | NM_001081425 | Rbm24 | RNA binding motif protein 24 | -1.55 |
| 1430245_at | BM209124 | --- |  | -1.55 |
| 1416889_at | NM_009405 | Tnni2 | troponin I, skeletal, fast 2 | -1.55 |
| 1457321_at | XM_001474094 | D130037M23Rik | RIKEN cDNA D130037M23 gene | -1.55 |
| 1451440_at | NM_139134 | Chodl | chondrolectin | -1.55 |
| 1425968_s_at | NM_001085370 | Speg | SPEG complex locus | -1.55 |
| 1441254_at | NM_001081050 | Pard3b | par-3 partitioning defective 3 homolog B (C. elegans) | -1.55 |
| 1429506_at | NM_001163660 | Nkd1 | naked cuticle 1 homolog (Drosophila) | -1.55 |
| 1420505_a_at | NM_001113569 | Stxbp1 | syntaxin binding protein 1 | -1.55 |
| 1449632_s_at | NM_001163481 | Fkbp10 | FK506 binding protein 10 | -1.55 |
| 1443867_at | NM_001025572 | Ankrd12 | ankyrin repeat domain 12 | -1.55 |
| 1424015_at | NM_021494 | Dennd5a | DENN/MADD domain containing 5A | -1.55 |
| 1434410_at | NM_174848 | Crybg3 | beta-gamma crystallin domain containing 3 | -1.55 |
| 1417846_at | NM_013881 | Ulk2 | Unc-51 like kinase 2 (C. elegans) | -1.55 |
| 1428288_at | NM_010638 | Klf9 | Kruppel-like factor 9 | -1.56 |
| 1434474_at | NM_147219 | Abca5 | ATP-binding cassette, sub-family A (ABC1), member 5 | -1.56 |
| 1434326_x_at | NM_175484 | Coro2b | coronin, actin binding protein, 2B | -1.56 |
| 1420422_at | NM_053146 | Pcdhb21 | protocadherin beta 21 | -1.56 |
| 1433588_at | NM_026585 | D6Wsu116e | DNA segment, Chr 6, Wayne State University 116, expressed | -1.56 |
| 1434557_at | NM_146001 | Hip1 | huntingtin interacting protein 1 | -1.56 |
| 1436870_s_at | NM_001177796 | Afap1l2 | actin filament associated protein 1-like 2 | -1.56 |
| 1427986_a_at | NM_028266 | Col16a1 | collagen, type XVI, alpha 1 | -1.56 |
| 1418170_a_at | NM_080855 | Zcchc14 | zinc finger, CCHC domain containing 14 | -1.56 |
| 1430375_a_at | NM_001048179 | Ccl27a /// Ccl27b | chemokine (C-C motif) ligand 27A /// chemokine (C-C motif) ligand 27b | -1.56 |
| 1418382_at | NM_133237 | Apcdd1 | adenomatosis polyposis coli down-regulated 1 | -1.56 |
| 1436966_at | NM_033602 | Peli2 | pellino 2 | -1.56 |
| 1415850_at | NM_009025 | Rasa3 | RAS p21 protein activator 3 | -1.56 |
| 1439295_x_at | NM_001008427 | Gm5595 | predicted gene 5595 | -1.56 |
| 1418058_at | NM_133222 | Eltd1 | EGF, latrophilin seven transmembrane domain containing 1 | -1.56 |
| 1427070_at | NM_133924 | Snx21 | sorting nexin family member 21 | -1.56 |
| 1422064_a_at | NM_019778 | Zbtb20 | zinc finger and BTB domain containing 20 | -1.56 |
| 1434141_at | NM_021896 | Gucy1a3 | guanylate cyclase 1, soluble, alpha 3 | -1.56 |
| 1416623_at | NM_013691 | Thbs3 | thrombospondin 3 | -1.56 |
| 1448259_at | NM_008047 | Fstl1 | follistatin-like 1 | -1.56 |
| 1416779_at | NM_138741 | Sdpr | serum deprivation response | -1.56 |
| 1416183_a_at | NM_008492 | Ldhb | lactate dehydrogenase B | -1.56 |
| 1417978_at | NM_025829 | Eif4e3 | eukaryotic translation initiation factor 4E member 3 | -1.56 |
| 1428064_at | NM_001040111 | Arap1 | ArfGAP with RhoGAP domain, ankyrin repeat and PH domain 1 | -1.56 |
| 1426511_at | NM_001162913 | Susd2 | sushi domain containing 2 | -1.56 |
| 1428510_at | NM_181039 | Lphn1 | latrophilin 1 | -1.56 |
| 1437291_at | NM_175381 | 2700081O15Rik | RIKEN cDNA 2700081O15 gene | -1.56 |
| 1449335_at | NM_011595 | Timp3 | tissue inhibitor of metalloproteinase 3 | -1.56 |
| 1419256_at | NM_009260 | Spnb2 | spectrin beta 2 | -1.56 |
| 1458268_s_at | NM_008343 | Igfbp3 | insulin-like growth factor binding protein 3 | -1.56 |
| 1427416_x_at | NM_153459 | Dusp7 | dual specificity phosphatase 7 | -1.57 |
| 1455706_at | NM_011505 | Stxbp4 | syntaxin binding protein 4 | -1.57 |
| 1418511_at | NM_019759 | Dpt | dermatopontin | -1.57 |
| 1435763_at | NM_172443 | Tbc1d16 | TBC1 domain family, member 16 | -1.57 |
| 1448944_at | NM_008737 | Nrp1 | neuropilin 1 | -1.57 |
| 1440087_at | BB560357 | --- |  | -1.57 |
| 1417181_a_at | NM_010629 | Kifap3 | kinesin-associated protein 3 | -1.57 |
| 1417734_at | NM_017476 | Akap8l | A kinase (PRKA) anchor protein 8-like | -1.57 |
| 1418393_a_at | NM_008398 | Itga7 | integrin alpha 7 | -1.57 |
| 1416164_at | NM_011812 | Fbln5 | fibulin 5 | -1.57 |
| 1425526_a_at | NM_001025570 | Prrx1 | paired related homeobox 1 | -1.57 |
| 1429494_at | NM_029979 | Trim35 | tripartite motif-containing 35 | -1.57 |
| 1437598_at | NM_019778 | Zbtb20 | zinc finger and BTB domain containing 20 | -1.57 |
| 1438183_x_at | NM_146126 | Sord | sorbitol dehydrogenase | -1.57 |
| 1450700_at | NM_026514 | Cdc42ep3 | CDC42 effector protein (Rho GTPase binding) 3 | -1.57 |
| 1455446_x_at | NM_025826 | Acadsb | acyl-Coenzyme A dehydrogenase, short/branched chain | -1.57 |
| 1425991_a_at | NM_145611 | Kank2 | KN motif and ankyrin repeat domains 2 | -1.57 |
| 1454734_at | NM_010703 | Lef1 | lymphoid enhancer binding factor 1 | -1.57 |
| 1419216_at | NM_009734 | Azi1 | 5-azacytidine induced gene 1 | -1.57 |
| 1436954_at | NM_153138 | Wipf1 | WAS/WASL interacting protein family, member 1 | -1.57 |
| 1429693_at | NM_001008702 | Dab2 | disabled homolog 2 (Drosophila) | -1.58 |
| 1419126_at | NM_013555 | Hoxd9 | homeobox D9 | -1.58 |
| 1460220_a_at | NM_001113529 | Csf1 | colony stimulating factor 1 (macrophage) | -1.58 |
| 1418455_at | NM_019877 | Copz2 | coatomer protein complex, subunit zeta 2 | -1.58 |
| 1451019_at | NM_019861 | Ctsf | cathepsin F | -1.58 |
| 1428960_at | NM_027728 | Enkur | enkurin, TRPC channel interacting protein | -1.58 |
| 1447788_s_at | NM_198617 | Tspyl3 | TSPY-like 3 | -1.58 |
| 1457058_at | NM_175643 | Adamts2 | a disintegrin-like and metallopeptidase (reprolysin type) with thrombospondin type 1 motif, 2 | -1.58 |
| 1417018_at | NM_001164352 | Efemp2 | epidermal growth factor-containing fibulin-like extracellular matrix protein 2 | -1.58 |
| 1435525_at | NM_001081367 | Kctd17 | potassium channel tetramerisation domain containing 17 | -1.58 |
| 1424157_at | NM_153068 | Ehd2 | EH-domain containing 2 | -1.58 |
| 1434196_at | NM_021422 | Dnaja4 | DnaJ (Hsp40) homolog, subfamily A, member 4 | -1.58 |
| 1419358_at | NM_030889 | Sorcs2 | sortilin-related VPS10 domain containing receptor 2 | -1.58 |
| 1418981_at | NM_009808 | Casp12 | caspase 12 | -1.58 |
| 1449577_x_at | NM_009416 | Tpm2 | tropomyosin 2, beta | -1.58 |
| 1417128_at | NM_023320 | Plekho1 | pleckstrin homology domain containing, family O member 1 | -1.58 |
| 1427307_a_at | NM_010014 | Dab1 | disabled homolog 1 (Drosophila) | -1.58 |
| 1433682_at | NM_001081116 | Arhgef17 | Rho guanine nucleotide exchange factor (GEF) 17 | -1.58 |
| 1435649_at | NM_199465 | Nexn | nexilin | -1.58 |
| 1435456_at | NM_024477 | Ttc28 | tetratricopeptide repeat domain 28 | -1.58 |
| 1448788_at | NM_010818 | Cd200 | CD200 antigen | -1.58 |
| 1423484_at | NM_031397 | Bicc1 | bicaudal C homolog 1 (Drosophila) | -1.58 |
| 1437201_at | NM_178725 | Lrrc4c | leucine rich repeat containing 4C | -1.58 |
| 1448656_at | NM_001044741 | Cacnb3 | calcium channel, voltage-dependent, beta 3 subunit | -1.59 |
| 1431833_a_at | NM_008256 | Hmgcs2 | 3-hydroxy-3-methylglutaryl-Coenzyme A synthase 2 | -1.59 |
| 1450449_a_at | NM_021430 | Rilpl1 | Rab interacting lysosomal protein-like 1 | -1.59 |
| 1456056_a_at | NM_026585 | D6Wsu116e | DNA segment, Chr 6, Wayne State University 116, expressed | -1.59 |
| 1429965_at | NM_001029878 | Lonrf2 | LON peptidase N-terminal domain and ring finger 2 | -1.59 |
| 1452283_at | NM_027760 | Rassf8 | Ras association (RalGDS/AF-6) domain family (N-terminal) member 8 | -1.59 |
| 1424270_at | NM_001111051 | Dclk1 | doublecortin-like kinase 1 | -1.59 |
| 1441945_s_at | NM_001110271 | Abhd14a | abhydrolase domain containing 14A | -1.59 |
| 1455143_at | NM_198862 | Nlgn2 | neuroligin 2 | -1.59 |
| 1434776_at | NM_009154 | Sema5a | sema domain, seven thrombospondin repeats (type 1 and type 1-like), transmembrane domain (TM) and short cytoplasmic domain, (semaphorin) 5A | -1.59 |
| 1451093_at | NM_025554 | Polr2e | polymerase (RNA) II (DNA directed) polypeptide E | -1.59 |
| 1451542_at | NM_024186 | Ssbp2 | single-stranded DNA binding protein 2 | -1.59 |
| 1436939_at | NM_178680 | Unc45b | unc-45 homolog B (C. elegans) | -1.59 |
| 1419872_at | NM_001037859 | Csf1r | colony stimulating factor 1 receptor | -1.59 |
| 1417179_at | NM_019571 | Tspan5 | tetraspanin 5 | -1.59 |
| 1456464_x_at | NM_018804 | Syt11 | Synaptotagmin XI | -1.59 |
| 1456765_at | NM_001163610 | Nhsl2 | NHS-like 2 | -1.59 |
| 1425639_at | NM_172133 | Adap2 | ArfGAP with dual PH domains 2 | -1.59 |
| 1425528_at | NM_001025570 | Prrx1 | paired related homeobox 1 | -1.59 |
| 1441732_at | AU042873 | --- |  | -1.59 |
| 1418237_s_at | NM_001109991 | Col18a1 | collagen, type XVIII, alpha 1 | -1.59 |
| 1418448_at | NM_009101 | Rras | Harvey rat sarcoma oncogene, subgroup R | -1.59 |
| 1439846_at | NM_010636 | Klf12 | Kruppel-like factor 12 | -1.59 |
| 1416590_a_at | NM_001159482 | Rab34 | RAB34, member of RAS oncogene family | -1.59 |
| 1432057_a_at | NM_027547 | Prdm5 | PR domain containing 5 | -1.59 |
| 1449536_at | NM_032397 | Kcnn1 | potassium intermediate/small conductance calcium-activated channel, subfamily N, member 1 | -1.59 |
| 1423507_a_at | NM_001122765 | Sirt2 | sirtuin 2 (silent mating type information regulation 2, homolog) 2 (S. cerevisiae) | -1.59 |
| 1455494_at | NM_007742 | Col1a1 | collagen, type I, alpha 1 | -1.60 |
| 1416206_at | NM_001164480 | Sipa1 | signal-induced proliferation associated gene 1 | -1.60 |
| 1424239_at | NM_001081241 | Fam65a | family with sequence similarity 65, member A | -1.60 |
| 1426615_s_at | NM_001195006 | Ndrg4 | N-myc downstream regulated gene 4 | -1.60 |
| 1449078_at | NM_018784 | St3gal6 | ST3 beta-galactoside alpha-2,3-sialyltransferase 6 | -1.60 |
| 1452187_at | NM_148930 | Rbm5 | RNA binding motif protein 5 | -1.60 |
| 1423551_at | NM_019707 | Cdh13 | cadherin 13 | -1.60 |
| 1452338_s_at | NM_001110275 | Itsn1 | intersectin 1 (SH3 domain protein 1A) | -1.60 |
| 1416431_at | NM_026473 | Tubb6 | tubulin, beta 6 | -1.60 |
| 1429487_at | NM_027892 | Ppp1r12a | protein phosphatase 1, regulatory (inhibitor) subunit 12A | -1.60 |
| 1448688_at | NM_013723 | Podxl | podocalyxin-like | -1.60 |
| 1416708_a_at | NM_027898 | Gramd1a | GRAM domain containing 1A | -1.60 |
| 1417836_at | NM_024198 | Gpx7 | glutathione peroxidase 7 | -1.60 |
| 1419283_s_at | NM_027884 | Tns1 | tensin 1 | -1.60 |
| 1418402_at | NM_009616 | Adam19 | a disintegrin and metallopeptidase domain 19 (meltrin beta) | -1.60 |
| 1455722_at | BB425316 | --- |  | -1.60 |
| 1425979_a_at | NM_172571 | Fbf1 | Fas (TNFRSF6) binding factor 1 | -1.60 |
| 1428769_at | NM_001163421 | Tatdn3 | TatD DNase domain containing 3 | -1.60 |
| 1445758_at | BG076276 | --- |  | -1.60 |
| 1448949_at | NM_007607 | Car4 | carbonic anhydrase 4 | -1.60 |
| 1423115_at | NM_001025310 | St6galnac6 | ST6 (alpha-N-acetyl-neuraminyl-2,3-beta-galactosyl-1,3)-N-acetylgalactosaminide alpha-2,6-sialyltransferase 6 | -1.60 |
| 1435600_s_at | NM_145536 | BC020535 | cDNA sequence BC020535 | -1.60 |
| 1452667_at | NM_172601 | Rab2b | RAB2B, member RAS oncogene family | -1.60 |
| 1436033_at | NM_001113283 | BC031353 | cDNA sequence BC031353 | -1.60 |
| 1435339_at | NM_146188 | Kctd15 | potassium channel tetramerisation domain containing 15 | -1.60 |
| 1456925_at | NM_001159561 | P2rx6 | purinergic receptor P2X, ligand-gated ion channel, 6 | -1.61 |
| 1434264_at | NM_001034168 | Ank2 | ankyrin 2, brain | -1.61 |
| 1439478_at | NM_134188 | Acot2 | acyl-CoA thioesterase 2 | -1.61 |
| 1434881_s_at | NM_177715 | Kctd12 | potassium channel tetramerisation domain containing 12 | -1.61 |
| 1426539_at | NM_145628 | Usp11 | ubiquitin specific peptidase 11 | -1.61 |
| 1440884_s_at | BB218047 | A530047J11Rik | RIKEN cDNA A530047J11 gene | -1.61 |
| 1421400_at | NM_031169 | Kcnmb1 | potassium large conductance calcium-activated channel, subfamily M, beta member 1 | -1.61 |
| 1418910_at | NM_007557 | Bmp7 | bone morphogenetic protein 7 | -1.61 |
| 1415712_at | NM_207302 | Zranb1 | zinc finger, RAN-binding domain containing 1 | -1.61 |
| 1453103_at | NM_001103177 | Ablim1 | actin-binding LIM protein 1 | -1.61 |
| 1456500_at | NM_177583 | Aph1b | anterior pharynx defective 1b homolog (C. elegans) | -1.61 |
| 1420498_a_at | NM_001008702 | Dab2 | disabled homolog 2 (Drosophila) | -1.61 |
| 1449178_at | NM_016798 | Pdlim3 | PDZ and LIM domain 3 | -1.61 |
| 1456763_at | NM_012027 | Mprip | myosin phosphatase Rho interacting protein | -1.61 |
| 1455467_at | NM_001142781 | Fam188b | family with sequence similarity 188, member B | -1.61 |
| 1415877_at | NM_001136086 | Dpysl3 | dihydropyrimidinase-like 3 | -1.61 |
| 1423606_at | NM_001198765 | Postn | periostin, osteoblast specific factor | -1.61 |
| 1455582_at | BI156044 | --- |  | -1.61 |
| 1435933_at | NM_001099298 | Scn2a1 | sodium channel, voltage-gated, type II, alpha 1 | -1.61 |
| 1426997_at | NM_178060 | Thra | thyroid hormone receptor alpha | -1.62 |
| 1424586_at | NM_153078 | Ehbp1 | EH domain binding protein 1 | -1.62 |
| 1422619_at | NM_008247 | Ppap2a | phosphatidic acid phosphatase type 2A | -1.62 |
| 1452761_a_at | NM_001172121 | Rbms3 | RNA binding motif, single stranded interacting protein | -1.62 |
| 1419039_at | NM_001163472 | Cyp2d22 | cytochrome P450, family 2, subfamily d, polypeptide 22 | -1.62 |
| 1416713_at | NM_026481 | Tppp3 | tubulin polymerization-promoting protein family member 3 | -1.62 |
| 1417933_at | NM_008344 | Igfbp6 | insulin-like growth factor binding protein 6 | -1.62 |
| 1450040_at | NM_011594 | Timp2 | tissue inhibitor of metalloproteinase 2 | -1.62 |
| 1433745_at | NM_001081302 | Trio | triple functional domain (PTPRF interacting) | -1.62 |
| 1416846_a_at | NM_018884 | Pdzrn3 | PDZ domain containing RING finger 3 | -1.62 |
| 1417278_a_at | NM_001163660 | Nkd1 | naked cuticle 1 homolog (Drosophila) | -1.62 |
| 1435823_x_at | NM_001164564 | Egfl7 | EGF-like domain 7 | -1.62 |
| 1454726_s_at | NM_207232 | Ptpdc1 | protein tyrosine phosphatase domain containing 1 | -1.62 |
| 1435321_at | NM_001001980 | Limch1 | LIM and calponin homology domains 1 | -1.62 |
| 1448839_at | NM_030697 | Kank3 | KN motif and ankyrin repeat domains 3 | -1.62 |
| 1417169_at | NM_016808 | Usp2 | ubiquitin specific peptidase 2 | -1.62 |
| 1418446_at | NM_009197 | Slc16a2 | solute carrier family 16 (monocarboxylic acid transporters), member 2 | -1.62 |
| 1417071_s_at | NM_133969 | Cyp4v3 | cytochrome P450, family 4, subfamily v, polypeptide 3 | -1.62 |
| 1424008_a_at | NM_028030 | Rbpms2 | RNA binding protein with multiple splicing 2 | -1.62 |
| 1424382_at | NM_026555 | Rcn3 | reticulocalbin 3, EF-hand calcium binding domain | -1.62 |
| 1419259_at | NM_009105 | Rsu1 | Ras suppressor protein 1 | -1.62 |
| 1429582_at | NM_001037098 | Nacc2 | nucleus accumbens associated 2, BEN and BTB (POZ) domain containing | -1.62 |
| 1460210_at | NM_013630 | Pkd1 | polycystic kidney disease 1 homolog | -1.62 |
| 1427508_at | NM_001038499 | Arsi | arylsulfatase i | -1.62 |
| 1418450_at | NM_001195431 | Islr | immunoglobulin superfamily containing leucine-rich repeat | -1.62 |
| 1424567_at | NM_027533 | Tspan2 | tetraspanin 2 | -1.62 |
| 1455033_at | NM_001163567 | Fam102b | family with sequence similarity 102, member B | -1.62 |
| 1437003_at | BB323930 | --- |  | -1.62 |
| 1428540_at | NM_029930 | Fam115a | family with sequence similarity 115, member A | -1.63 |
| 1451621_at | NM_024282 | Pppde1 | PPPDE peptidase domain containing 1 | -1.63 |
| 1422245_a_at | NM_010826 | Mrvi1 | MRV integration site 1 | -1.63 |
| 1434528_at | NM_175503 | Aard | alanine and arginine rich domain containing protein | -1.63 |
| 1417116_at | NM_001142809 | Slc6a8 | solute carrier family 6 (neurotransmitter transporter, creatine), member 8 | -1.63 |
| 1441870_s_at | NM_008861 | Pkd2 | polycystic kidney disease 2 | -1.63 |
| 1454675_at | NM_178060 | Thra | thyroid hormone receptor alpha | -1.63 |
| 1427371_at | NM_153145 | Abca8a | ATP-binding cassette, sub-family A (ABC1), member 8a | -1.63 |
| 1453855_at | NM_026280 | Mxra7 | matrix-remodelling associated 7 | -1.63 |
| 1435130_at | NM_001013778 | Fam18a | family with sequence similarity 18, member A | -1.63 |
| 1416778_at | NM_138741 | Sdpr | serum deprivation response | -1.63 |
| 1449466_at | NM_011606 | Clec3b | C-type lectin domain family 3, member b | -1.63 |
| 1455607_at | NM_028351 | Rspo3 | R-spondin 3 homolog (Xenopus laevis) | -1.63 |
| 1427560_at | NM_011383 | Six5 | sine oculis-related homeobox 5 homolog (Drosophila) | -1.63 |
| 1418187_at | NM_019444 | Ramp2 | receptor (calcitonin) activity modifying protein 2 | -1.63 |
| 1448529_at | NM_009378 | Thbd | thrombomodulin | -1.63 |
| 1417644_at | NM_010656 | Sspn | sarcospan | -1.63 |
| 1451500_at | NM_181418 | Ushbp1 | Usher syndrome 1C binding protein 1 | -1.63 |
| 1435589_at | NM_198616 | Ccdc85b | coiled-coil domain containing 85B | -1.63 |
| 1452889_at | NM_029609 | Lhpp | phospholysine phosphohistidine inorganic pyrophosphate phosphatase | -1.63 |
| 1460287_at | NM_011594 | Timp2 | tissue inhibitor of metalloproteinase 2 | -1.63 |
| 1424596_s_at | NM_144799 | Lmcd1 | LIM and cysteine-rich domains 1 | -1.63 |
| 1448785_at | NM_001111026 | Runx1t1 | runt-related transcription factor 1; translocated to, 1 (cyclin D-related) | -1.64 |
| 1417558_at | NM_001122892 | Fyn | Fyn proto-oncogene | -1.64 |
| 1436350_at | NM_175514 | Fam171b | family with sequence similarity 171, member B | -1.64 |
| 1450928_at | NM_031166 | Id4 | inhibitor of DNA binding 4 | -1.64 |
| 1434073_at | NM_001163015 | Gprasp2 /// LOC100504991 | G protein-coupled receptor associated sorting protein 2 /// hypothetical LOC100504991 | -1.64 |
| 1456439_x_at | NM_001164433 | Mical1 | microtubule associated monoxygenase, calponin and LIM domain containing 1 | -1.64 |
| 1424862_s_at | NM_145124 | Mib2 | mindbomb homolog 2 (Drosophila) | -1.64 |
| 1456253_s_at | NM_198305 | Klhl17 | kelch-like 17 (Drosophila) | -1.64 |
| 1455251_at | NM_001033228 | Itga1 | integrin alpha 1 | -1.64 |
| 1455090_at | NM_011923 | Angptl2 | angiopoietin-like 2 | -1.64 |
| 1419089_at | NM_011595 | Timp3 | tissue inhibitor of metalloproteinase 3 | -1.64 |
| 1439926_at | NM_175256 | Heg1 | HEG homolog 1 (zebrafish) | -1.64 |
| 1423352_at | NM_031402 | Crispld1 | cysteine-rich secretory protein LCCL domain containing 1 | -1.64 |
| 1423677_at | NM_012056 | Fkbp9 | FK506 binding protein 9 | -1.64 |
| 1437216_at | NM_176841 | Ccdc88a | coiled coil domain containing 88A | -1.64 |
| 1437066_at | NM_019778 | Zbtb20 | zinc finger and BTB domain containing 20 | -1.64 |
| 1448890_at | NM_008452 | Klf2 | Kruppel-like factor 2 (lung) | -1.64 |
| 1450919_at | NM_008621 | Mpp1 | membrane protein, palmitoylated | -1.64 |
| 1450922_a_at | NM_009367 | Tgfb2 | transforming growth factor, beta 2 | -1.64 |
| 1455064_at | NM_029781 | Rab36 | RAB36, member RAS oncogene family | -1.65 |
| 1418201_at | NM_001083912 | Plekhg2 | pleckstrin homology domain containing, family G (with RhoGef domain) member 2 | -1.65 |
| 1439518_at | NM_153127 | Mmrn2 | multimerin 2 | -1.65 |
| 1451782_a_at | NM_022880 | Slc29a1 | solute carrier family 29 (nucleoside transporters), member 1 | -1.65 |
| 1416080_at | NM_001037722 | Adam15 | a disintegrin and metallopeptidase domain 15 (metargidin) | -1.65 |
| 1428646_at | NM_008783 | Pbx1 | pre B-cell leukemia transcription factor 1 | -1.65 |
| 1428394_at | NM_172267 | Phyhd1 | phytanoyl-CoA dioxygenase domain containing 1 | -1.65 |
| 1449145_a_at | NM_007616 | Cav1 | caveolin 1, caveolae protein | -1.65 |
| 1451469_at | NM_175275 | Cntln | centlein, centrosomal protein | -1.65 |
| 1424669_at | NM_026752 | Zfyve21 | zinc finger, FYVE domain containing 21 | -1.65 |
| 1419703_at | NM_016919 | Col5a3 | collagen, type V, alpha 3 | -1.65 |
| 1420371_at | NM_009229 | Sntb2 | syntrophin, basic 2 | -1.65 |
| 1420532_at | NM_001170745 | Magi2 | membrane associated guanylate kinase, WW and PDZ domain containing 2 | -1.65 |
| 1436277_at | NM_001033489 | Rnf207 | ring finger protein 207 | -1.65 |
| 1459897_a_at | NM_001083903 | Sbsn | suprabasin | -1.65 |
| 1434265_s_at | NM_001034168 | Ank2 | ankyrin 2, brain | -1.65 |
| 1434442_at | NM_175096 | Stbd1 | starch binding domain 1 | -1.65 |
| 1458662_at | NM_026102 | Daam1 | dishevelled associated activator of morphogenesis 1 | -1.65 |
| 1456424_s_at | NM_011125 | Pltp | phospholipid transfer protein | -1.65 |
| 1424374_at | NM_174990 | Gimap4 | GTPase, IMAP family member 4 | -1.65 |
| 1454867_at | NM_001081235 | Mn1 | meningioma 1 | -1.65 |
| 1455717_s_at | NM_001008231 | Daam2 | dishevelled associated activator of morphogenesis 2 | -1.65 |
| 1447852_x_at | NM_021430 | Rilpl1 | Rab interacting lysosomal protein-like 1 | -1.65 |
| 1455558_at | NM_001033298 | Plk1s1 | polo-like kinase 1 substrate 1 | -1.66 |
| 1455870_at | NM_001035532 | Akap2 | A kinase (PRKA) anchor protein 2 | -1.66 |
| 1441704_at | BB369657 | --- |  | -1.66 |
| 1439128_at | NM_019778 | Zbtb20 | zinc finger and BTB domain containing 20 | -1.66 |
| 1454848_at | NM_029834 | Ppp1r12c | protein phosphatase 1, regulatory (inhibitor) subunit 12C | -1.66 |
| 1453285_at | NM_025915 | Tmem88 | transmembrane protein 88 | -1.66 |
| 1417009_at | NM_023143 | C1ra | complement component 1, r subcomponent A | -1.66 |
| 1424393_s_at | NM_175236 | Adhfe1 | alcohol dehydrogenase, iron containing, 1 | -1.66 |
| 1436459_at | BG073622 | --- |  | -1.66 |
| 1427167_at | XM_003086849 | Armcx4 /// LOC100504837 | armadillo repeat containing, X-linked 4 /// armadillo repeat-containing X-linked protein 5-like | -1.66 |
| 1459807_x_at | NM_028944 | P4htm | prolyl 4-hydroxylase, transmembrane (endoplasmic reticulum) | -1.66 |
| 1448664_a_at | NM_001085370 | Speg | SPEG complex locus | -1.66 |
| 1430543_at | NM_001081114 | Clip3 | CAP-GLY domain containing linker protein 3 | -1.66 |
| 1437933_at | NM_020259 | Hhip | Hedgehog-interacting protein | -1.66 |
| 1448925_at | NM_007855 | Twist2 | twist homolog 2 (Drosophila) | -1.66 |
| 1454953_at | NM_027258 | Rnf157 | ring finger protein 157 | -1.66 |
| 1440619_at | NM_011162 | Mapk8ip1 | mitogen-activated protein kinase 8 interacting protein 1 | -1.66 |
| 1425582_a_at | NM_001163522 | Emcn | endomucin | -1.66 |
| 1427240_at | NM_177030 | Dock6 | dedicator of cytokinesis 6 | -1.66 |
| 1455061_a_at | NM_177470 | Acaa2 | acetyl-Coenzyme A acyltransferase 2 (mitochondrial 3-oxoacyl-Coenzyme A thiolase) | -1.66 |
| 1437161_x_at | NM_001042674 | Rbpms | RNA binding protein gene with multiple splicing | -1.66 |
| 1436616_at | NM_030266 | Inpp4a | inositol polyphosphate-4-phosphatase, type I | -1.66 |
| 1457587_at | NM_001160139 | Kcnq5 | potassium voltage-gated channel, subfamily Q, member 5 | -1.66 |
| 1452072_at | NM_026793 | Myct1 | myc target 1 | -1.66 |
| 1429235_at | NM_030166 | Galntl2 | UDP-N-acetyl-alpha-D-galactosamine:polypeptide N-acetylgalactosaminyltransferase-like 2 | -1.66 |
| 1456721_at | NM_001164805 | Thsd7a | thrombospondin, type I, domain containing 7A | -1.66 |
| 1420408_a_at | NM_001044720 | Abcc9 | ATP-binding cassette, sub-family C (CFTR/MRP), member 9 | -1.66 |
| 1437439_at | NM_001162906 | 2410089E03Rik | RIKEN cDNA 2410089E03 gene | -1.67 |
| 1416474_at | NM_020043 | Igdcc4 | immunoglobulin superfamily, DCC subclass, member 4 | -1.67 |
| 1434333_a_at | NM_178900 | Prkd2 | protein kinase D2 | -1.67 |
| 1448602_at | NM_011224 | Pygm | muscle glycogen phosphorylase | -1.67 |
| 1419040_at | NM_001163472 | Cyp2d22 | cytochrome P450, family 2, subfamily d, polypeptide 22 | -1.67 |
| 1437633_at | NM_001081379 | Ankrd11 | ankyrin repeat domain 11 | -1.67 |
| 1436991_x_at | NM_146120 | Gsn | gelsolin | -1.67 |
| 1447851_x_at | NM_009728 | Atp10a | ATPase, class V, type 10A | -1.67 |
| 1423071_x_at | XR_107730 | LOC100505088 | hypothetical LOC100505088 | -1.67 |
| 1435910_at | NM_021890 | Fads3 | fatty acid desaturase 3 | -1.67 |
| 1428647_at | NM_008783 | Pbx1 | pre B-cell leukemia transcription factor 1 | -1.67 |
| 1455522_at | NM_177566 | Arhgef15 | Rho guanine nucleotide exchange factor (GEF) 15 | -1.67 |
| 1422184_a_at | NM_001198790 | Ak1 | adenylate kinase 1 | -1.67 |
| 1455277_at | NM_020259 | Hhip | Hedgehog-interacting protein | -1.67 |
| 1416072_at | NM_001111059 | Cd34 | CD34 antigen | -1.68 |
| 1435041_at | NM_010860 | Myl6 | myosin, light polypeptide 6, alkali, smooth muscle and non-muscle | -1.68 |
| 1418533_s_at | NM_020510 | Fzd2 | frizzled homolog 2 (Drosophila) | -1.68 |
| 1440975_at | NM_026280 | Mxra7 | matrix-remodelling associated 7 | -1.68 |
| 1457589_at | NM_001080814 | Fat3 | FAT tumor suppressor homolog 3 (Drosophila) | -1.68 |
| 1439527_at | NM_008829 | Pgr | progesterone receptor | -1.68 |
| 1437479_x_at | NM_011535 | Tbx3 | T-box 3 | -1.68 |
| 1416740_at | NM_015734 | Col5a1 | collagen, type V, alpha 1 | -1.68 |
| 1425091_at | NM_027852 | Rarres2 | retinoic acid receptor responder (tazarotene induced) 2 | -1.68 |
| 1443952_at | NM_178060 | Thra | thyroid hormone receptor alpha | -1.68 |
| 1418059_at | NM_133222 | Eltd1 | EGF, latrophilin seven transmembrane domain containing 1 | -1.68 |
| 1448237_x_at | NM_008492 | Ldhb | lactate dehydrogenase B | -1.68 |
| 1450209_at | NM_010469 | Hoxd4 | homeobox D4 | -1.68 |
| 1417756_a_at | NM_001136071 | Lsp1 | lymphocyte specific 1 | -1.68 |
| 1451173_at | NM_001146046 | Lrrc49 | leucine rich repeat containing 49 | -1.68 |
| 1422758_at | NM_018763 | Chst2 | carbohydrate sulfotransferase 2 | -1.68 |
| 1437310_at | NM_001033128 | Bbs1 | Bardet-Biedl syndrome 1 (human) | -1.69 |
| 1418926_at | NM_011546 | Zeb1 | zinc finger E-box binding homeobox 1 | -1.69 |
| 1438143_s_at | NM_009125 | Atxn2 | ataxin 2 | -1.69 |
| 1427344_s_at | NM_029182 | Rasd2 | RASD family, member 2 | -1.69 |
| 1416780_at | NM_001163487 | Pfkm | phosphofructokinase, muscle | -1.69 |
| 1428431_at | NM_001101433 | Zcchc24 | zinc finger, CCHC domain containing 24 | -1.69 |
| 1426951_at | NM_015800 | Crim1 | cysteine rich transmembrane BMP regulator 1 (chordin like) | -1.69 |
| 1460081_at | NM_018801 | Syt7 | synaptotagmin VII | -1.69 |
| 1421006_at | NM_053185 | Col4a6 | collagen, type IV, alpha 6 | -1.69 |
| 1421075_s_at | NM_007825 | Cyp7b1 | cytochrome P450, family 7, subfamily b, polypeptide 1 | -1.69 |
| 1437089_at | NM_029011 | Pyroxd2 | pyridine nucleotide-disulphide oxidoreductase domain 2 | -1.69 |
| 1422710_a_at | NM_001163691 | Cacna1h | calcium channel, voltage-dependent, T type, alpha 1H subunit | -1.69 |
| 1426851_a_at | NM_010930 | Nov | nephroblastoma overexpressed gene | -1.69 |
| 1419584_at | NM_024477 | Ttc28 | tetratricopeptide repeat domain 28 | -1.69 |
| 1426584_a_at | NM_146126 | Sord | sorbitol dehydrogenase | -1.69 |
| 1437123_at | NM_153127 | Mmrn2 | multimerin 2 | -1.69 |
| 1417780_at | NM_026058 | Lass4 | LAG1 homolog, ceramide synthase 4 | -1.69 |
| 1454613_at | NM_001136086 | Dpysl3 | dihydropyrimidinase-like 3 | -1.69 |
| 1416007_at | NM_001163630 | Satb1 | special AT-rich sequence binding protein 1 | -1.70 |
| 1429543_at | AI553459 | 6230424C14Rik | RIKEN cDNA 6230424C14 gene | -1.70 |
| 1422622_at | NM_008713 | Nos3 | nitric oxide synthase 3, endothelial cell | -1.70 |
| 1433538_at | NM_183195 | Marveld1 | MARVEL (membrane-associating) domain containing 1 | -1.70 |
| 1438104_at | BB122985 | --- |  | -1.70 |
| 1435895_at | NM_175548 | Lsamp | limbic system-associated membrane protein | -1.70 |
| 1455447_at | NR_015481 | D430019H16Rik | RIKEN cDNA D430019H16 gene | -1.70 |
| 1435148_at | NM_013415 | Atp1b2 | ATPase, Na+/K+ transporting, beta 2 polypeptide | -1.70 |
| 1418726_a_at | NM_001130174 | Tnnt2 | troponin T2, cardiac | -1.70 |
| 1416675_s_at | NM_019676 | Plcd1 | phospholipase C, delta 1 | -1.70 |
| 1417951_at | NM_001136062 | Eno3 | enolase 3, beta muscle | -1.70 |
| 1442187_at | NM_009747 | Bdkrb2 | Bradykinin receptor, beta 2 | -1.71 |
| 1424394_at | NM_053267 | Selm | selenoprotein M | -1.71 |
| 1423585_at | NM_001159518 | Igfbp7 | insulin-like growth factor binding protein 7 | -1.71 |
| 1438606_a_at | NM_013885 | Clic4 | chloride intracellular channel 4 (mitochondrial) | -1.71 |
| 1460578_at | NM_172731 | Fgd5 | FYVE, RhoGEF and PH domain containing 5 | -1.71 |
| 1421297_a_at | NM_001159533 | Cacna1c | calcium channel, voltage-dependent, L type, alpha 1C subunit | -1.71 |
| 1426210_x_at | NM_145619 | Parp3 | poly (ADP-ribose) polymerase family, member 3 | -1.71 |
| 1434362_at | BM249454 | --- |  | -1.71 |
| 1428289_at | NM_010638 | Klf9 | Kruppel-like factor 9 | -1.71 |
| 1435730_at | BM118190 | D930026N18Rik | RIKEN cDNA D930026N18 gene | -1.71 |
| 1427320_at | NR_002845 | Copg2as2 | coatomer protein complex, subunit gamma 2, antisense 2 | -1.71 |
| 1416159_at | NM_009697 | Nr2f2 | nuclear receptor subfamily 2, group F, member 2 | -1.71 |
| 1449135_at | NM_009236 | Sox18 | SRY-box containing gene 18 | -1.71 |
| 1448816_at | NM_008968 | Ptgis | prostaglandin I2 (prostacyclin) synthase | -1.71 |
| 1440739_at | NM_009506 | Vegfc | vascular endothelial growth factor C | -1.71 |
| 1417645_at | NM_010656 | Sspn | sarcospan | -1.71 |
| 1437417_s_at | NM_001079844 | Gpc6 | glypican 6 | -1.71 |
| 1455626_at | NM_010456 | Hoxa9 | homeobox A9 | -1.71 |
| 1454677_at | NM_011594 | Timp2 | tissue inhibitor of metalloproteinase 2 | -1.71 |
| 1418090_at | NM_032398 | Plvap | plasmalemma vesicle associated protein | -1.72 |
| 1448316_at | NM_024217 | Cmtm3 | CKLF-like MARVEL transmembrane domain containing 3 | -1.72 |
| 1418164_at | NM_007941 | Stx2 | syntaxin 2 | -1.72 |
| 1437392_at | NM_001085521 | Tmem90b | transmembrane protein 90B | -1.72 |
| 1450397_at | NM_008634 | Mtap1b | microtubule-associated protein 1B | -1.72 |
| 1437429_at | NM_029967 | Adamtsl1 | ADAMTS-like 1 | -1.72 |
| 1417741_at | NM_133198 | Pygl | liver glycogen phosphorylase | -1.72 |
| 1417839_at | NM_013805 | Cldn5 | claudin 5 | -1.72 |
| 1428146_s_at | NM_177470 | Acaa2 | acetyl-Coenzyme A acyltransferase 2 (mitochondrial 3-oxoacyl-Coenzyme A thiolase) | -1.72 |
| 1426832_at | NM_172779 | Ddx26b | DEAD/H (Asp-Glu-Ala-Asp/His) box polypeptide 26B | -1.72 |
| 1426955_at | NM_001109991 | Col18a1 | collagen, type XVIII, alpha 1 | -1.73 |
| 1433523_at | NM_178702 | Radil | Ras association and DIL domains | -1.73 |
| 1432176_a_at | NM_001146348 | Eng | endoglin | -1.73 |
| 1426097_a_at | NM_146178 | Ccdc106 | coiled-coil domain containing 106 | -1.73 |
| 1439044_at | NM_013922 | Zfp354c | zinc finger protein 354C | -1.73 |
| 1433662_s_at | NM_011594 | Timp2 | tissue inhibitor of metalloproteinase 2 | -1.73 |
| 1439827_at | NM_175501 | Adamts12 | a disintegrin-like and metallopeptidase (reprolysin type) with thrombospondin type 1 motif, 12 | -1.73 |
| 1459903_at | NM_011352 | Sema7a | sema domain, immunoglobulin domain (Ig), and GPI membrane anchor, (semaphorin) 7A | -1.73 |
| 1452832_s_at | NM_138651 | Cds2 | CDP-diacylglycerol synthase (phosphatidate cytidylyltransferase) 2 | -1.73 |
| 1443219_at | BM232535 | --- |  | -1.73 |
| 1423885_at | NM_010683 | Lamc1 | laminin, gamma 1 | -1.73 |
| 1448250_at | NM_133733 | 9030425E11Rik | RIKEN cDNA 9030425E11 gene | -1.73 |
| 1416405_at | NM_007542 | Bgn | biglycan | -1.73 |
| 1418379_s_at | NM_054044 | Gpr124 | G protein-coupled receptor 124 | -1.73 |
| 1428538_s_at | NM_027852 | Rarres2 | retinoic acid receptor responder (tazarotene induced) 2 | -1.73 |
| 1434194_at | NM_001039934 | Mtap2 | microtubule-associated protein 2 | -1.73 |
| 1422941_at | NM_053116 | Wnt16 | wingless-related MMTV integration site 16 | -1.73 |
| 1460559_at | NM_145611 | Kank2 | KN motif and ankyrin repeat domains 2 | -1.74 |
| 1418250_at | NM_025404 | Arl4d | ADP-ribosylation factor-like 4D | -1.74 |
| 1424852_at | NM_001170537 | Mef2c | myocyte enhancer factor 2C | -1.74 |
| 1448823_at | NM_001012477 | Cxcl12 | chemokine (C-X-C motif) ligand 12 | -1.74 |
| 1448696_at | NM_001159627 | Heph | hephaestin | -1.74 |
| 1417130_s_at | NM_020581 | Angptl4 | angiopoietin-like 4 | -1.74 |
| 1453152_at | NM_174857 | Mamdc2 | MAM domain containing 2 | -1.74 |
| 1416414_at | NM_133918 | Emilin1 | elastin microfibril interfacer 1 | -1.74 |
| 1448494_at | NM_008086 | Gas1 | growth arrest specific 1 | -1.74 |
| 1449687_at | NM_001166413 | D10Ertd610e | DNA segment, Chr 10, ERATO Doi 610, expressed | -1.74 |
| 1417872_at | NM_001077361 | Fhl1 | four and a half LIM domains 1 | -1.74 |
| 1422788_at | NM_021398 | Slc43a3 | solute carrier family 43, member 3 | -1.74 |
| 1460222_at | NM_009164 | Sh3bp1 | SH3-domain binding protein 1 | -1.74 |
| 1440244_at | NM_133659 | Erg | avian erythroblastosis virus E-26 (v-ets) oncogene related | -1.74 |
| 1436985_at | NM_026856 | Zfp644 | zinc finger protein 644 | -1.74 |
| 1435537_at | NM_001014288 | Ptprd | protein tyrosine phosphatase, receptor type, D | -1.74 |
| 1448251_at | NM_133733 | 9030425E11Rik | RIKEN cDNA 9030425E11 gene | -1.74 |
| 1448209_a_at | NM_021551 | Slc22a17 | solute carrier family 22 (organic cation transporter), member 17 | -1.75 |
| 1448475_at | NM_133859 | Olfml3 | olfactomedin-like 3 | -1.75 |
| 1444229_at | NM_009697 | Nr2f2 | nuclear receptor subfamily 2, group F, member 2 | -1.75 |
| 1449396_at | NM_009675 | Aoc3 | amine oxidase, copper containing 3 | -1.75 |
| 1417104_at | NM_001146346 | Emp3 | epithelial membrane protein 3 | -1.75 |
| 1435701_at | NM_144853 | Cyyr1 | cysteine and tyrosine-rich protein 1 | -1.75 |
| 1435459_at | NM_018881 | Fmo2 | flavin containing monooxygenase 2 | -1.75 |
| 1447849_s_at | NM_001025577 | Maf | avian musculoaponeurotic fibrosarcoma (v-maf) AS42 oncogene homolog | -1.75 |
| 1433716_x_at | NM_008115 | Gfra2 | glial cell line derived neurotrophic factor family receptor alpha 2 | -1.75 |
| 1437422_at | NM_009154 | Sema5a | sema domain, seven thrombospondin repeats (type 1 and type 1-like), transmembrane domain (TM) and short cytoplasmic domain, (semaphorin) 5A | -1.75 |
| 1428026_at | NM_080455 | Tshz2 | teashirt zinc finger family member 2 | -1.75 |
| 1454997_at | NM_177092 | Msrb3 | methionine sulfoxide reductase B3 | -1.75 |
| 1429726_at | NM_025807 | Slc16a9 | solute carrier family 16 (monocarboxylic acid transporters), member 9 | -1.75 |
| 1455622_at | NM_176973 | Podxl2 | podocalyxin-like 2 | -1.75 |
| 1434581_at | NM_026629 | 2410066E13Rik | RIKEN cDNA 2410066E13 gene | -1.75 |
| 1453159_at | NM_027974 | Efhc1 | EF-hand domain (C-terminal) containing 1 | -1.75 |
| 1449626_s_at | NM_025988 | Acbd4 | acyl-Coenzyme A binding domain containing 4 | -1.75 |
| 1422906_at | NM_011920 | Abcg2 | ATP-binding cassette, sub-family G (WHITE), member 2 | -1.75 |
| 1450641_at | NM_011701 | Vim | vimentin | -1.75 |
| 1453185_at | NM_025669 | Sfrs18 | serine/arginine-rich splicing factor 18 | -1.76 |
| 1429313_at | NM_013845 | Ror1 | receptor tyrosine kinase-like orphan receptor 1 | -1.76 |
| 1426708_at | NM_133738 | Antxr2 | anthrax toxin receptor 2 | -1.76 |
| 1435578_s_at | NM_010014 | Dab1 | disabled homolog 1 (Drosophila) | -1.76 |
| 1439348_at | NM_009112 | S100a10 | S100 calcium binding protein A10 (calpactin) | -1.76 |
| 1449520_at | NM_024477 | Ttc28 | tetratricopeptide repeat domain 28 | -1.76 |
| 1452114_s_at | NM_010518 | Igfbp5 | insulin-like growth factor binding protein 5 | -1.76 |
| 1418485_at | NM_009208 | Slc4a3 | solute carrier family 4 (anion exchanger), member 3 | -1.76 |
| 1434819_at | NM_172829 | St6gal2 | beta galactoside alpha 2,6 sialyltransferase 2 | -1.76 |
| 1438299_at | XM_974671 | 9230108I15Rik | RIKEN cDNA 9230108I15 gene | -1.76 |
| 1450798_at | NM_031176 | Tnxb | tenascin XB | -1.76 |
| 1418467_at | NM_025891 | Smarcd3 | SWI/SNF related, matrix associated, actin dependent regulator of chromatin, subfamily d, member 3 | -1.76 |
| 1456111_at | NM_172921 | Fam55d | family with sequence similarity 55, member D | -1.76 |
| 1452913_at | NM_025557 | Pcp4l1 | Purkinje cell protein 4-like 1 | -1.76 |
| 1418445_at | NM_009197 | Slc16a2 | solute carrier family 16 (monocarboxylic acid transporters), member 2 | -1.76 |
| 1438258_at | NM_001161420 | Vldlr | very low density lipoprotein receptor | -1.76 |
| 1435281_at | NM_153679 | Cpt1c | carnitine palmitoyltransferase 1c | -1.77 |
| 1422118_at | NM_023485 | Sync | syncoilin | -1.77 |
| 1419706_a_at | NM_031185 | Akap12 | A kinase (PRKA) anchor protein (gravin) 12 | -1.77 |
| 1426855_at | NM_001166413 | D10Ertd610e | DNA segment, Chr 10, ERATO Doi 610, expressed | -1.77 |
| 1417439_at | NM_054042 | Cd248 | CD248 antigen, endosialin | -1.77 |
| 1424807_at | NM_010681 | Lama4 | laminin, alpha 4 | -1.77 |
| 1416716_at | NM_010112 | Efs | embryonal Fyn-associated substrate | -1.77 |
| 1426285_at | NM_008481 | Lama2 | laminin, alpha 2 | -1.77 |
| 1418269_at | NM_013586 | Loxl3 | lysyl oxidase-like 3 | -1.77 |
| 1434735_at | NM_172563 | Hlf | hepatic leukemia factor | -1.77 |
| 1430568_at | NM_026083 | Zc3h13 | zinc finger CCCH type containing 13 | -1.78 |
| 1437218_at | NM_010233 | Fn1 | fibronectin 1 | -1.78 |
| 1435796_at | NM_177292 | Wscd2 | WSC domain containing 2 | -1.78 |
| 1457198_at | NM_008737 | Nrp1 | neuropilin 1 | -1.78 |
| 1449530_at | NM_032000 | Trps1 | trichorhinophalangeal syndrome I (human) | -1.78 |
| 1424186_at | NM_026439 | Ccdc80 | coiled-coil domain containing 80 | -1.78 |
| 1428332_at | NM_178149 | Pik3ip1 | phosphoinositide-3-kinase interacting protein 1 | -1.78 |
| 1439754_at | NM_011438 | Sox12 | SRY-box containing gene 12 | -1.78 |
| 1454790_at | NM_001159527 | Wdr35 | WD repeat domain 35 | -1.78 |
| 1420444_at | NM_011395 | Slc22a3 | solute carrier family 22 (organic cation transporter), member 3 | -1.78 |
| 1453586_at | NM_009848 | Entpd1 | ectonucleoside triphosphate diphosphohydrolase 1 | -1.79 |
| 1448211_at | NM_133764 | Atp6v0e2 | ATPase, H+ transporting, lysosomal V0 subunit E2 | -1.79 |
| 1433924_at | NM_008817 | Peg3 | paternally expressed 3 | -1.79 |
| 1432198_at | AK018172 | --- |  | -1.79 |
| 1416455_a_at | NM_009964 | Cryab | crystallin, alpha B | -1.79 |
| 1426231_at | NM_001197028 | Vit | vitrin | -1.79 |
| 1428707_at | NM_026988 | Ptms | parathymosin | -1.79 |
| 1416865_at | NM_008001 | Fgd1 | FYVE, RhoGEF and PH domain containing 1 | -1.79 |
| 1459713_s_at | NM_178642 | Ano1 | anoctamin 1, calcium activated chloride channel | -1.79 |
| 1422982_at | NM_013476 | Ar | androgen receptor | -1.79 |
| 1448201_at | NM_009144 | Sfrp2 | secreted frizzled-related protein 2 | -1.80 |
| 1424187_at | NM_026439 | Ccdc80 | coiled-coil domain containing 80 | -1.80 |
| 1435256_at | NM_001081114 | Clip3 | CAP-GLY domain containing linker protein 3 | -1.80 |
| 1418892_at | NM_023275 | Rhoj | ras homolog gene family, member J | -1.80 |
| 1424770_at | NM_145575 | Cald1 | caldesmon 1 | -1.80 |
| 1436367_at | NM_029928 | Ptprb | protein tyrosine phosphatase, receptor type, B | -1.80 |
| 1452766_at | NM_182839 | Tppp | tubulin polymerization promoting protein | -1.80 |
| 1455792_x_at | NM_010882 | Ndn | necdin | -1.80 |
| 1452202_at | NM_001008548 | Pde2a | phosphodiesterase 2A, cGMP-stimulated | -1.81 |
| 1449563_at | NM_001159647 | Cntn1 | contactin 1 | -1.81 |
| 1458341_x_at | NM_153422 | Pde5a | phosphodiesterase 5A, cGMP-specific | -1.81 |
| 1427201_at | NM_181390 | Mustn1 | musculoskeletal, embryonic nuclear protein 1 | -1.81 |
| 1436766_at | NM_001170848 | LOC100504012 /// Luc7l2 | hypothetical LOC100504012 /// LUC7-like 2 (S. cerevisiae) | -1.81 |
| 1436984_at | NM_001198570 | Abi2 | abl-interactor 2 | -1.81 |
| 1456046_at | NM_010740 | Cd93 | CD93 antigen | -1.81 |
| 1449531_at | NM_013534 | Leprel2 | leprecan-like 2 | -1.81 |
| 1418773_at | NM_021890 | Fads3 | fatty acid desaturase 3 | -1.81 |
| 1424379_at | NM_009800 | Car11 | carbonic anhydrase 11 | -1.81 |
| 1436957_at | NM_008067 | Gabra3 | gamma-aminobutyric acid (GABA) A receptor, subunit alpha 3 | -1.81 |
| 1437889_x_at | NM_007542 | Bgn | biglycan | -1.81 |
| 1419056_at | NM_001025364 | Rtn2 | reticulon 2 (Z-band associated protein) | -1.81 |
| 1438114_x_at | NM_010112 | Efs | Embryonal Fyn-associated substrate | -1.81 |
| 1432032_a_at | NM_009711 | Artn | artemin | -1.82 |
| 1428948_at | NM_010610 | Kcnma1 | potassium large conductance calcium-activated channel, subfamily M, alpha member 1 | -1.82 |
| 1427640_a_at | NM_001111026 | Runx1t1 | runt-related transcription factor 1; translocated to, 1 (cyclin D-related) | -1.82 |
| 1422642_at | NM_026514 | Cdc42ep3 | CDC42 effector protein (Rho GTPase binding) 3 | -1.82 |
| 1423180_at | NM_008420 | Kcnb1 | potassium voltage gated channel, Shab-related subfamily, member 1 | -1.82 |
| 1435805_at | NM_001033223 | Lin7a | lin-7 homolog A (C. elegans) | -1.82 |
| 1418086_at | NM_026731 | Ppp1r14a | protein phosphatase 1, regulatory (inhibitor) subunit 14A | -1.83 |
| 1441412_s_at | NM_001165952 | Trim45 | tripartite motif-containing 45 | -1.83 |
| 1449377_at | NM_025449 | Nicn1 | nicolin 1 | -1.83 |
| 1435337_at | NM_172298 | Tshz3 | teashirt zinc finger family member 3 | -1.83 |
| 1428535_at | NM_001081963 | 9430020K01Rik | RIKEN cDNA 9430020K01 gene | -1.83 |
| 1448876_at | NM_021292 | Evc | Ellis van Creveld gene homolog (human) | -1.83 |
| 1438255_at | NM_183186 | Foxn3 | forkhead box N3 | -1.83 |
| 1433956_at | NM_009868 | Cdh5 | cadherin 5 | -1.84 |
| 1450276_a_at | NM_001146196 | Scin | scinderin | -1.84 |
| 1452731_x_at | NM_001024712 | ENSMUSG00000068790 /// Gm10128 /// Gm2897 /// Gm3002 /// Gm3373 /// Gm3558 /// Gm3696 /// Gm8348 | predicted gene, ENSMUSG00000068790 /// alpha-takusan pseudogene /// predicted gene 2897 /// alpha-takusan pseudogene /// predicted gene 3373 /// predicted gene 3558 /// predicted gene 3696 /// predicted pseudogene 8348 | -1.84 |
| 1442698_at | BB252728 | --- |  | -1.84 |
| 1423250_a_at | NM_009367 | Tgfb2 | transforming growth factor, beta 2 | -1.84 |
| 1435771_at | NM_013829 | Plcb4 | phospholipase C, beta 4 | -1.85 |
| 1448162_at | NM_011693 | Vcam1 | vascular cell adhesion molecule 1 | -1.85 |
| 1436763_a_at | NM_010638 | Klf9 | Kruppel-like factor 9 | -1.85 |
| 1449168_a_at | NM_001035532 | Akap2 /// Palm2 | A kinase (PRKA) anchor protein 2 /// paralemmin 2 | -1.86 |
| 1417429_at | NM_010231 | Fmo1 | flavin containing monooxygenase 1 | -1.86 |
| 1449461_at | NM_022020 | Rbp7 | retinol binding protein 7, cellular | -1.86 |
| 1450637_a_at | NM_009636 | Aebp1 | AE binding protein 1 | -1.86 |
| 1435387_at | NM_001033633 | Slc2a13 | solute carrier family 2 (facilitated glucose transporter), member 13 | -1.86 |
| 1435673_at | BB756663 | AI448005 | expressed sequence AI448005 | -1.86 |
| 1418142_at | NM_008428 | Kcnj8 | potassium inwardly-rectifying channel, subfamily J, member 8 | -1.86 |
| 1418796_at | NM_009131 | Clec11a | C-type lectin domain family 11, member a | -1.86 |
| 1423062_at | NM_008343 | Igfbp3 | insulin-like growth factor binding protein 3 | -1.87 |
| 1450923_at | NM_009367 | Tgfb2 | transforming growth factor, beta 2 | -1.87 |
| 1427486_at | NM_029928 | Ptprb | protein tyrosine phosphatase, receptor type, B | -1.87 |
| 1449630_s_at | NM_145515 | Mark1 | MAP/microtubule affinity-regulating kinase 1 | -1.87 |
| 1417900_a_at | NM_001161420 | Vldlr | very low density lipoprotein receptor | -1.87 |
| 1449058_at | NM_010296 | Gli1 | GLI-Kruppel family member GLI1 | -1.87 |
| 1419978_s_at | NM_001166413 | D10Ertd610e | DNA segment, Chr 10, ERATO Doi 610, expressed | -1.87 |
| 1456292_a_at | NM_011701 | Vim | vimentin | -1.88 |
| 1436650_at | NM_001081243 | Filip1 | filamin A interacting protein 1 | -1.88 |
| 1416203_at | NM_007472 | Aqp1 | aquaporin 1 | -1.88 |
| 1455160_at | NR_015483 | 2610203C20Rik | RIKEN cDNA 2610203C20 gene | -1.88 |
| 1435941_at | NM_139228 | Rhbdl3 | rhomboid, veinlet-like 3 (Drosophila) | -1.88 |
| 1422561_at | NM_011782 | Adamts5 | a disintegrin-like and metallopeptidase (reprolysin type) with thrombospondin type 1 motif, 5 (aggrecanase-2) | -1.88 |
| 1437342_x_at | NM_145925 | Pttg1ip | pituitary tumor-transforming 1 interacting protein | -1.88 |
| 1436324_at | XM_001004201 | Stard9 | START domain containing 9 | -1.88 |
| 1418186_at | NM_008185 | Gstt1 | glutathione S-transferase, theta 1 | -1.88 |
| 1460574_at | NM_183221 | Fat4 | FAT tumor suppressor homolog 4 (Drosophila) | -1.89 |
| 1455826_a_at | NM_001145947 | Bace1 | beta-site APP cleaving enzyme 1 | -1.89 |
| 1429113_at | NM_001102563 | 2900092E17Rik /// Prrt2 | RIKEN cDNA 2900092E17 gene /// proline-rich transmembrane protein 2 | -1.89 |
| 1427054_s_at | NM_001014399 | Abi3bp | ABI gene family, member 3 (NESH) binding protein | -1.89 |
| 1433658_x_at | NM_021567 | Pcbp4 | poly(rC) binding protein 4 | -1.89 |
| 1420578_at | NM_001160420 | Optc | opticin | -1.90 |
| 1435399_at | NM_080451 | Synpo2 | synaptopodin 2 | -1.90 |
| 1448902_at | NM_001168475 | Ttc23 | tetratricopeptide repeat domain 23 | -1.90 |
| 1444734_at | BB183877 | A330001L22Rik | RIKEN cDNA A330001L22 gene | -1.90 |
| 1453011_at | NM_001172055 | Bdh2 | 3-hydroxybutyrate dehydrogenase, type 2 | -1.90 |
| 1417092_at | NM_001083935 | Pth1r | parathyroid hormone 1 receptor | -1.91 |
| 1426246_at | NM_011173 | Pros1 | protein S (alpha) | -1.91 |
| 1438672_at | NM_133167 | Parvb | parvin, beta | -1.91 |
| 1452382_at | NR_002870 | Dnm3os | dynamin 3, opposite strand | -1.92 |
| 1417129_a_at | NM_001136072 | Meis2 | Meis homeobox 2 | -1.92 |
| 1419985_s_at | NM_177471 | Ccdc69 | coiled-coil domain containing 69 | -1.92 |
| 1447725_at | BE948505 | C030034E14Rik | RIKEN cDNA C030034E14 gene | -1.92 |
| 1447711_x_at | XR_105385 | 4933412E12Rik | RIKEN cDNA 4933412E12 gene | -1.92 |
| 1452107_s_at | NM_001029836 | Npnt | nephronectin | -1.93 |
| 1434465_x_at | NM_001161420 | Vldlr | very low density lipoprotein receptor | -1.93 |
| 1421579_at | NM_010456 | Hoxa9 | homeobox A9 | -1.93 |
| 1455050_at | NM_178791 | E130203B14Rik | RIKEN cDNA E130203B14 gene | -1.94 |
| 1442977_at | BG075843 | --- |  | -1.94 |
| 1429052_at | NM_001014288 | Ptprd | protein tyrosine phosphatase, receptor type, D | -1.94 |
| 1455425_at | NM_027384 | Tet1 | tet oncogene 1 | -1.94 |
| 1419380_at | NM_033327 | Zfp423 | zinc finger protein 423 | -1.94 |
| 1435275_at | NM_183405 | Cox6b2 | cytochrome c oxidase subunit VIb polypeptide 2 | -1.94 |
| 1416006_at | NM_001012335 | Mdk | midkine | -1.95 |
| 1433434_at | NM_178737 | AW551984 | expressed sequence AW551984 | -1.95 |
| 1421101_a_at | NM_001077398 | Ldb2 | LIM domain binding 2 | -1.95 |
| 1425894_at | NM_145379 | Mrgprf | MAS-related GPR, member F | -1.95 |
| 1420941_at | NM_009063 | Rgs5 | regulator of G-protein signaling 5 | -1.96 |
| 1441506_at | NM_001190451 | Dcn | decorin | -1.96 |
| 1454674_at | NM_183171 | Fez1 | fasciculation and elongation protein zeta 1 (zygin I) | -1.96 |
| 1417590_at | NM_024264 | Cyp27a1 | cytochrome P450, family 27, subfamily a, polypeptide 1 | -1.97 |
| 1456393_at | NM_001195338 | Ncrna00081 | non-protein coding RNA 81 | -1.97 |
| 1428541_at | NM_029930 | Fam115a | family with sequence similarity 115, member A | -1.97 |
| 1448152_at | NM_001122736 | Igf2 | insulin-like growth factor 2 | -1.97 |
| 1420484_a_at | NM_011707 | Vtn | vitronectin | -1.97 |
| 1448194_a_at | NR_001592 | H19 | H19 fetal liver mRNA | -1.97 |
| 1422905_s_at | NM_018881 | Fmo2 | flavin containing monooxygenase 2 | -1.97 |
| 1419589_at | NM_010740 | Cd93 | CD93 antigen | -1.98 |
| 1452666_a_at | NM_178874 | Tmcc2 | transmembrane and coiled-coil domains 2 | -1.98 |
| 1452183_a_at | NR_003633 | Meg3 | maternally expressed 3 | -1.98 |
| 1451204_at | NM_001168318 | Scara5 | scavenger receptor class A, member 5 (putative) | -1.98 |
| 1424375_s_at | NM_174990 | Gimap4 | GTPase, IMAP family member 4 | -1.99 |
| 1435083_at | NM_183315 | Ctxn1 | cortexin 1 | -1.99 |
| 1440173_x_at | NM_011347 | Selp | selectin, platelet | -2.00 |
| 1434202_a_at | NM_183187 | Fam107a | family with sequence similarity 107, member A | -2.00 |
| 1416759_at | NM_001164433 | Mical1 | microtubule associated monoxygenase, calponin and LIM domain containing 1 | -2.00 |
| 1437853_x_at | NM_010882 | Ndn | necdin | -2.00 |
| 1429918_at | NM_175535 | Arhgap20 | Rho GTPase activating protein 20 | -2.00 |
| 1438549_a_at | NM_001163311 | Srr | serine racemase | -2.00 |
| 1426560_a_at | NM_001029836 | Npnt | nephronectin | -2.00 |
| 1417168_a_at | NM_016808 | Usp2 | ubiquitin specific peptidase 2 | -2.01 |
| 1451990_at | NM_001162941 | Mapre2 | microtubule-associated protein, RP/EB family, member 2 | -2.01 |
| 1428301_at | NM_001024712 | ENSMUSG00000068790 /// Gm10128 /// Gm10406 /// Gm2897 /// Gm3373 /// Gm3558 /// Gm3696 | predicted gene, ENSMUSG00000068790 /// alpha-takusan pseudogene /// predicted gene 10406 /// predicted gene 2897 /// predicted gene 3373 /// predicted gene 3558 /// predicted gene 3696 | -2.02 |
| 1418788_at | NM_013690 | Tek | endothelial-specific receptor tyrosine kinase | -2.02 |
| 1457632_s_at | NM_001136072 | Meis2 | Meis homeobox 2 | -2.03 |
| 1437165_a_at | NM_008788 | Pcolce | procollagen C-endopeptidase enhancer protein | -2.03 |
| 1419435_at | NM_009676 | Aox1 | aldehyde oxidase 1 | -2.04 |
| 1455164_at | NM_020260 | Arhgap31 | Rho GTPase activating protein 31 | -2.04 |
| 1438403_s_at | NR_002847 | Malat1 | metastasis associated lung adenocarcinoma transcript 1 (non-coding RNA) | -2.04 |
| 1439066_at | NM_009640 | Angpt1 | angiopoietin 1 | -2.04 |
| 1446408_at | NM_001122950 | Hoxa10 | Homeobox A10 | -2.05 |
| 1434990_at | NM_177167 | Ppm1e | protein phosphatase 1E (PP2C domain containing) | -2.05 |
| 1420719_at | NM_031374 | Tex15 | testis expressed gene 15 | -2.05 |
| 1418697_at | NM_009349 | Inmt | indolethylamine N-methyltransferase | -2.05 |
| 1456759_at | NM_178725 | Lrrc4c | Leucine rich repeat containing 4C | -2.05 |
| 1426852_x_at | NM_010930 | Nov | nephroblastoma overexpressed gene | -2.06 |
| 1420539_a_at | NM_133709 | Chrdl2 | chordin-like 2 | -2.06 |
| 1439699_at | BB525237 | --- |  | -2.06 |
| 1452308_a_at | NM_178405 | Atp1a2 | ATPase, Na+/K+ transporting, alpha 2 polypeptide | -2.06 |
| 1438496_a_at | NM_172779 | Ddx26b | DEAD/H (Asp-Glu-Ala-Asp/His) box polypeptide 26B | -2.08 |
| 1458624_at | NM_001081425 | Rbm24 | RNA binding motif protein 24 | -2.08 |
| 1434893_at | NM_178405 | Atp1a2 | ATPase, Na+/K+ transporting, alpha 2 polypeptide | -2.10 |
| 1421374_a_at | NM_019503 | Fxyd1 | FXYD domain-containing ion transport regulator 1 | -2.10 |
| 1448323_a_at | NM_007542 | Bgn | biglycan | -2.11 |
| 1424886_at | NM_001014288 | Ptprd | protein tyrosine phosphatase, receptor type, D | -2.11 |
| 1449350_at | NM_011859 | Osr1 | odd-skipped related 1 (Drosophila) | -2.14 |
| 1460371_at | NM_028306 | Hspa12b | heat shock protein 12B | -2.16 |
| 1419759_at | NM_011076 | Abcb1a | ATP-binding cassette, sub-family B (MDR/TAP), member 1A | -2.16 |
| 1417574_at | NM_001012477 | Cxcl12 | chemokine (C-X-C motif) ligand 12 | -2.16 |
| 1451447_at | NM_001172099 | Cuedc1 | CUE domain containing 1 | -2.18 |
| 1421477_at | NM_009946 | Cplx2 | complexin 2 | -2.18 |
| 1448136_at | NM_001136077 | Enpp2 | ectonucleotide pyrophosphatase/phosphodiesterase 2 | -2.19 |
| 1452981_at | NM_001159647 | Cntn1 | contactin 1 | -2.21 |
| 1444073_at | NM_001025577 | Maf | avian musculoaponeurotic fibrosarcoma (v-maf) AS42 oncogene homolog | -2.22 |
| 1427465_at | NM_178405 | Atp1a2 | ATPase, Na+/K+ transporting, alpha 2 polypeptide | -2.27 |
| 1455136_at | NM_178405 | Atp1a2 | ATPase, Na+/K+ transporting, alpha 2 polypeptide | -2.28 |
| 1456334_s_at | NR_027963 | Zfp783 | zinc finger protein 783 | -2.29 |
| 1443823_s_at | NM_178405 | Atp1a2 | ATPase, Na+/K+ transporting, alpha 2 polypeptide | -2.37 |
| 1443832_s_at | NM_138741 | Sdpr | serum deprivation response | -2.38 |
| 1448507_at | NM_028889 | Efhd1 | EF hand domain containing 1 | -2.38 |
| 1436332_at | NM_001012401 | Hspb6 | heat shock protein, alpha-crystallin-related, B6 | -2.41 |
| 1416301_a_at | NM_007897 | Ebf1 | early B-cell factor 1 | -2.45 |
| 1429822_at | AK014609 | 4633401B06Rik | RIKEN cDNA 4633401B06 gene | -2.48 |
| 1436713_s_at | NR_003633 | Meg3 | maternally expressed 3 | -2.52 |
| 1452905_at | NR_003633 | Meg3 | maternally expressed 3 | -2.53 |
| 1439380_x_at | NR_003633 | Meg3 | maternally expressed 3 | -2.55 |
| 1435603_at | NM_172463 | Sned1 | sushi, nidogen and EGF-like domains 1 | -2.56 |
| 1418858_at | NM_023617 | Aox3 | aldehyde oxidase 3 | -2.91 |
| 1448326_a_at | NM_013496 | Crabp1 | cellular retinoic acid binding protein I | -3.34 |

**Table S3.** List of genes associated with cell cycle and DNA replication whose transcripts are regulated by *Mig-6* ablation

| **Name** | **Symbol** | **Accession** | **Control vs *Mig-6d/d***  **Fold change** | ***Mig-6d/d* vs *Mig-6d/dErbb2d/d***  **Fold change** |
| --- | --- | --- | --- | --- |
| **DNA pre-replicative complex licensing genes** | | | | |
| Minichromosome maintenance deficient 2 | *Mcm2* | NM_008564 | 1.73 | -1.76 |
| Minichromosome maintenance deficient 3 | *Mcm3* | NM_008563 | 2.26 | -1.6 |
| Minichromosome maintenance deficient 4 | *Mcm4* | NM_008565 | 1.59 | -1.62 |
| Minichromosome maintenance deficient 5 | *Mcm5* | NM_008566 | 1.99 | -1.73 |
| Minichromosome maintenance deficient 6 | *Mcm6* | NM_008567 | 2.24 | -2.28 |
| **Chromatin assembly and modification genes** | | | | |
| Chromatin assembly factor 1, subunit B (p60) | *Chaf1b* | NM_028083 | 1.68 | -2.16 |
| Helicase, lymphoid specific | *Hells* | NM_008234 | 2.74 | -2.96 |
| **DNA replication genes** | | | | |
| Flap structure specific endonuclease 1 | *Fen1* | NM_007999 | 2.19 | -1.88 |
| Proliferating cell nuclear antigen | *Pcna* | NM_011045 | 1.58 | -1.54 |
| **Other cell-cycle-related genes** | | | | |
| Kruppel-like factor 4 | *Klf4* | NM_010637 | 2.55 | -2.22 |
| Kruppel-like factor 15 | *Klf15* | NM_023184 | -1.37 | 1.36 |
| MAD2 (mitotic arrest deficient, homolog)-like 1 | *Mad2l1* | NM_019499 | 2.09 | -1.8 |
| Myeloblastosis oncogene | *Myb* | NM_010848 | 8.29 | -5.3 |
| Thymidine kinase 1 | *Tk1* | NM_009387 | 1.6 | -1.43 |
| Cyclin B1 | *Ccnb1* | NM_172301 | 1.59 | -1.71 |

**Table S4.** Primers used for RT-qPCR

| Gene |  | Primer |
| --- | --- | --- |
| *hMIG-6* |  | Hs00219060_m1 |
| *mMig-6* |  | Mm00505292_m1 |
| *mErbb2* |  | Mm00658541_m1 |
| *mMuc1* |  | Mm00449604_m1 |
| *mClca3* |  | Mm00489959_m1 |
| *mLtf* |  | Mm00434787_m1 |
| *mC3* |  | Mm00437858_m1 |
| *mCdkl1* |  | Mm00806425_m1 |
| *m18s* |  | 4319413E |
| *mMcm2* | Forward | 5'-AGTGGAAGTGGGAAGTGACG-3' |
| Reverse | 5'-CGCAAACTGATCCTACAGCA-3' |
| *mMcm3* | Forward | 5'-CAACCTTGTCATCTGCCTGA-3' |
| Reverse | 5'-GCTGTGTCCTGCGTTTGTTA-3' |
| *mMcm4* | Forward | 5'-AGCAGAAGCCCATGCTAAAG-3' |
| Reverse | 5'-AATGCCAGTACGAGGGTCAG-3' |
| *mMcm5* | Forward | 5'-GTGCCCACTGGATCCATACT-3' |
| Reverse | 5'-GCATCTCACCATGAGGGACT-3' |
| *mMcm6* | Forward | 5'-CCTCGAATGCCTTCTGTCTC-3' |
| Reverse | 5'-GATTTCACAGGGGCACTGAT-3' |
| *mKlf15* | Forward | 5'-GAGACCTTCTCGTCACCGAAA-3' |
| Reverse | 5'-GCTGGAGACATCGCTGTCAT-3' |
| *mKlf4* | Forward | 5'-ACTACCCCTACACTGAGTCCCGAG-3' |
| Reverse | 5'-TAGTGCCTGGTCAGTTCATCGGAG-3' |
| *mHells* | Forward | 5'-GGCTGCGGGACTTGAGAAAG-3' |
| Reverse | 5'-GCAAATGCTGAAGTCTGCGG-3' |
| *mFen1* | Forward | 5'-TCAGCAATTAGTTTGGCAAGGCCG-3' |
| Reverse | 5'-ATTCGCTCTGCTCCGAACATTCCT-3' |
| *mPcna* | Forward | 5'-TGCTCTGAGGTACCTGAACT-3' |
| Reverse | 5'-TGCTTCCTCATCTTCAATCT-3' |
| *mScl25a13* | Forward | 5'-CCTGCGGCATCTTTAGTGACC-3' |
| Reverse | 5'-AATGCTTTGGGGCCCTCTTCTC-3' |
| *mCcnd1* | Forward | 5'-GCGTACCCTGACACCAATCT-3' |
| Reverse | 5'-ATCTCCTTCTGCACGCACTT-3' |
| *mTgfa* | Forward | 5'-ATCCTGTTAGCTGTGTGCCA-3' |
| Reverse | 5'-GGAATCTGGGCACTTGTTGA-3' |
| *m18s* | Forward | 5'-GTAACCCGTTGAACCCCATT-3' |
| Reverse | 5'-CCATCCAATCGGTAGTAGCG-3' |
